# Supplementary material for: Distinct global metabolomic profiles of the model organism Caenorhabditis elegans during interactions with Staphylococcus aureus and Salmonella enterica Serovar Typhi
Source: Royal Society of Chemistry journal article supplement (doi:10.1039/d3mo00040k), 2023-04-27
Supplement: d3mo00040k3.pdf [file d3mo00040k3.pdf]

1 **Distinct global metabolomic profile of the model organism *Caenorhabditis elegans* during**  
2 **the interaction of *Staphylococcus aureus* and *Salmonella enteric* Serovar Typhi**  
3 ***Balasubramanian Chellammal Muthubharathi*<sup>1</sup>, *Velayutham Ravichandiran*<sup>2</sup> and**  
4 ***Krishnaswamy Balamurugan*<sup>1\*</sup>**

5 <sup>1</sup>Department of Biotechnology, Alagappa University, Karaikudi, Tamil Nadu.

6 <sup>2</sup>National Institute of Pharmaceutical Education and Research, Kolkata, India

7

8 **Supplementary files:**

9 **Supplementary Figure 1: Heatmap of significantly differ in expression pattern of top 50**  
10 **metabolites of a) endo-metabolome and b) exo-metabolome of *E. coli* OP50 exposed, *S.***  
11 ***aureus* exposed and *S. Typhi* exposed *C. elegans* (SA- *S. aureus*, ST- *S. Typhi*)**

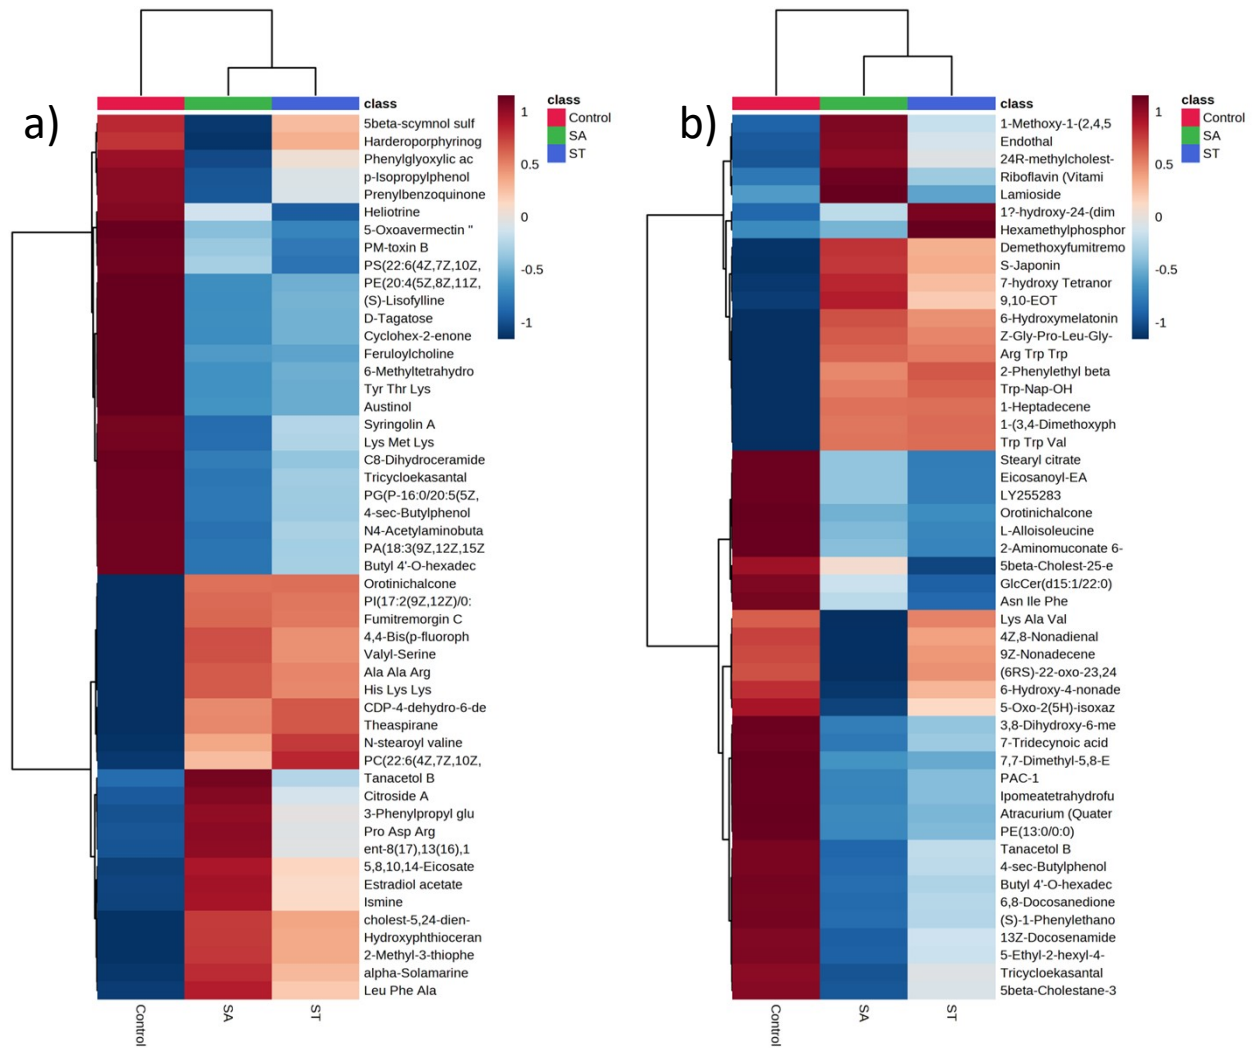

12

13

14

15 **Supplementary Figure 2: Multivariate ROC analysis of 100 features (Cross validation**  
 16 **performance) with 95 % confident interval. ROC analysis of 100 features of endo-**  
 17 **metabolome of a) *S. aureus* & b) *S. Typhi* exposed *C. elegans*; exo-metabolome of c) *S.*  
 18 ***aureus* & d) *S. Typhi* exposed *C. elegans*.****

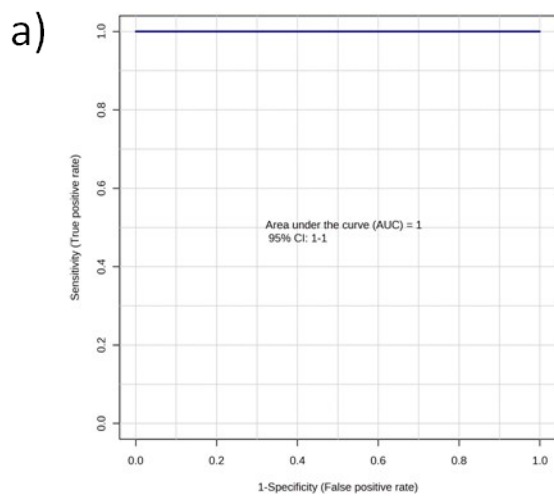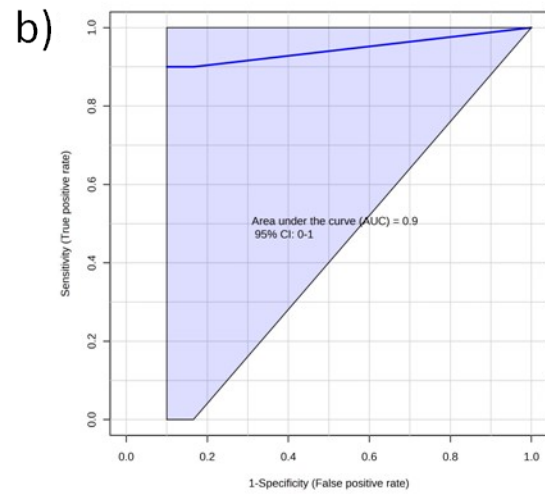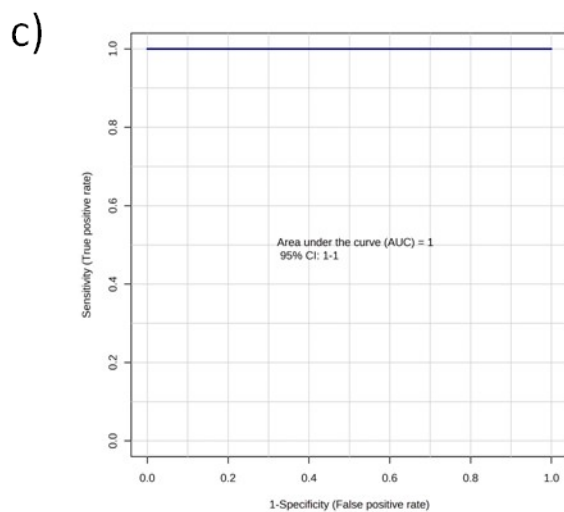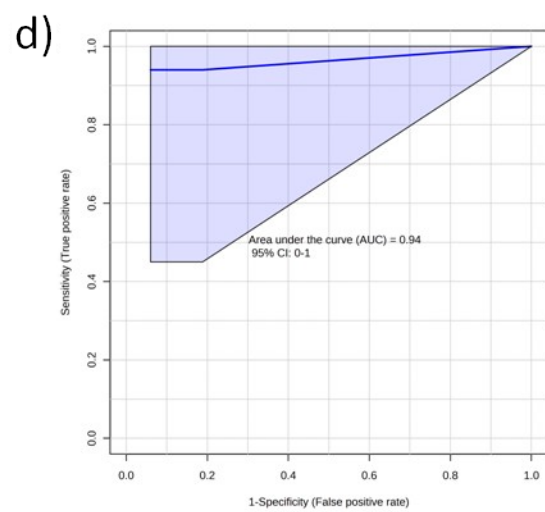

19

20

21 **Supplementary table 1: Metabolites found exclusively in endo- and exo-metabolome of *E.***

22 ***coli* OP50 exposed, *S. aureus* exposed and *S. Typhi* exposed *C. elegans***

23 ***(A separate file has been attached)***

24 **Supplementary Table 2: Enriched metabolic pathways and most abundant identified**

25 **metabolites [endo- & exo- metabolome of *E. coli* OP50 exposed, *S. aureus* exposed and *S.***

26 ***Typhi* exposed *C. elegans***

27

---

**Common Endo-metabolites of candidate pathogenic bacteria exposed *C. elegans* & *E. coli* OP50 fed *C. elegans***

---

| <b>Metabolism</b>                            | <b>Compounds identified</b>                                                                                |
|----------------------------------------------|------------------------------------------------------------------------------------------------------------|
| Purine metabolism                            | Guanine, Guanosine, Adenosine diphosphate ribose, Adenine, 5-Aminoimidazole ribonucleotide, Deoxyadenosine |
| Arginine and proline metabolism              | S-Adenosylmethioninamine, Spermidine, N4-Acetylaminobutanal, Pyrroline hydroxycarboxylic acid              |
| Thiamine metabolism                          | Thiamine, Thiamine monophosphate                                                                           |
| Sphingolipid metabolism                      | Sphingosine, 3-O-Sulfogalactosylceramide, Phytosphingosine                                                 |
| Drug metabolism - other enzymes              | 5-Fluorouridine, NPC, Isonicotinic acid                                                                    |
| D-Arginine and D-ornithine metabolism        | 2-Oxoarginine                                                                                              |
| Phosphonate and phosphinate metabolism       | Phosphocholine                                                                                             |
| Glycerophospholipid metabolism               | Phosphorylcholine, Glycerophosphocholine                                                                   |
| Caffeine metabolism                          | Paraxanthine                                                                                               |
| Tryptophan metabolism                        | Melatonin, 2-Aminomuconic acid semialdehyde                                                                |
| Histidine metabolism                         | N-Formyl-L-aspartate                                                                                       |
| Pentose and glucuronate interconversions     | L-Threo-2-pentulose or L Xylulose                                                                          |
| Selenocompound metabolism                    | Methylselenopyruvate                                                                                       |
| Ether lipid metabolism                       | Glycerophosphocholine                                                                                      |
| beta-Alanine metabolism                      | Spermidine                                                                                                 |
| Lysine degradation                           | Saccharopine                                                                                               |
| Folate biosynthesis                          | Dihydroptericoic acid                                                                                      |
| Galactose metabolism                         | D-Tagatose 1,6-bisphosphate                                                                                |
| Glutathione metabolism                       | Spermidine                                                                                                 |
| Cysteine and methionine metabolism           | S-Adenosylmethioninamine                                                                                   |
| N-Glycan biosynthesis                        | N-Acetyl-D-glucosaminyldiphosphodolichol                                                                   |
| Tyrosine metabolism                          | Tyramine                                                                                                   |
| Drug metabolism - cytochrome P450            | p-Hydroxyfelbamate                                                                                         |
| Metabolism of xenobiotics by cytochrome P450 | 2-(S-Glutathionyl)acetyl chloride                                                                          |

Steroid hormone biosynthesis

2-Methoxyestrone 3-glucuronide

---

**Common Exo-metabolites of candidate pathogenic bacteria exposed *C. elegans* and *E. coli* OP50 fed *C. elegans***

---

|                                          |                                                         |
|------------------------------------------|---------------------------------------------------------|
| Sphingolipid metabolism                  | Sphingosine, Phytosphingosine                           |
| D-Arginine and D-ornithine metabolism    | 2-Oxoarginine                                           |
| Purine metabolism                        | Guanine, Adenine, Deoxyadenosine                        |
| Phosphonate and phosphinate metabolism   | Phosphocholine                                          |
| Glycerophospholipid metabolism           | Phosphocholine, Glycerophosphocholine                   |
| Arginine and proline metabolism          | N4-Acetylaminobutanal, Pyrroline hydroxycarboxylic acid |
| Drug metabolism - other enzymes          | NPC, Isonicotinic acid                                  |
| Tryptophan metabolism                    | 2-Aminomuconic acid 6-semialdehyde, 6-Hydroxymelatonin  |
| Histidine metabolism                     | N-Formyl-L-aspartate                                    |
| Pentose and glucuronate interconversions | L-Threo-2-pentulose                                     |
| Ether lipid metabolism                   | Glycerophosphocholine                                   |
| Pentose phosphate pathway                | 6-Phosphonoglucono-D-lactone                            |
| Steroid hormone biosynthesis             | Tetrahydrocortisone, 2-Methoxyestrone 3-glucuronide     |
| N-Glycan biosynthesis                    | N-Acetyl-D-glucosaminyldiphosphodolichol                |
| Drug metabolism - cytochrome P450        | p-Hydroxyfelbamate                                      |

---

**Exclusive in *E. coli* OP50 fed *C. elegans*' endo-metabolome and not in endo-metabolome candidate pathogenic bacteria exposed *C. elegans***

---

|                                                     |                                                                                                                                                                                                          |
|-----------------------------------------------------|----------------------------------------------------------------------------------------------------------------------------------------------------------------------------------------------------------|
| Purine metabolism                                   | 2-(Formamido)-N1-(5-phospho-D-ribosyl)acetamidine, Deoxyinosine, Hypoxanthine, Inosine triphosphate, 2'-Deoxyinosine triphosphate, 5-hydroxy-2-oxo-4-ureido-2,5-dihydro-1H-imidazole-5-carboxylate, Urea |
| Phenylalanine, tyrosine and tryptophan biosynthesis | Phenylpyruvic acid                                                                                                                                                                                       |
| Porphyrin and chlorophyll metabolism                | Protoporphyrin IX, Coproporphyrinogen I                                                                                                                                                                  |
| Drug metabolism - other enzymes                     | Irinotecan, alpha-Fluoro-beta-alanine                                                                                                                                                                    |
| Vitamin B6 metabolism                               | 2-Oxo-3-hydroxy-4-phosphobutanoic acid                                                                                                                                                                   |
| Phenylalanine metabolism                            | Phenylpyruvic acid                                                                                                                                                                                       |
| Biotin metabolism                                   | Biotin                                                                                                                                                                                                   |

|                                          |                                                                         |
|------------------------------------------|-------------------------------------------------------------------------|
| Steroid hormone biosynthesis             | 21-Hydroxypregnenolone, Estrone sulfate, 2-Methoxyestrone 3-glucuronide |
| Arginine biosynthesis                    | Urea                                                                    |
| Pentose and glucuronate interconversions | D-Xylitol                                                               |
| Terpenoid backbone biosynthesis          | Farnesylcysteine                                                        |
| Galactose metabolism                     | Galactosylglycerol                                                      |
| Glycine, serine and threonine metabolism | Betaine aldehyde                                                        |
| N-Glycan biosynthesis                    | Dolichyl b-D-glucosyl phosphate                                         |
| Tryptophan metabolism                    | 5-Methoxyindoleacetate                                                  |
| Tyrosine metabolism                      | Epinephrine                                                             |

---

**Exclusive in *E. coli* OP50 exposed *C. elegans*' exo-metabolome and not in exo-metabolome of candidate pathogenic bacteria exposed *C. elegans***

---

|                                                     |                                                                                           |
|-----------------------------------------------------|-------------------------------------------------------------------------------------------|
| Pantothenate and CoA biosynthesis                   | Pantetheine 4'-phosphate, Pantothenic acid, D-4'-Phosphopantothenate, Uracil              |
| Vitamin B6 metabolism                               | Pyridoxal 5'-phosphate, 2-Oxo-3-hydroxy-4-phosphobutanoic acid                            |
| Biotin metabolism                                   | Biotin, Biocytin                                                                          |
| Arginine biosynthesis                               | L-Glutamine, Urea                                                                         |
| Purine metabolism                                   | L-Glutamine, Deoxyinosine, Hypoxanthine, Urea                                             |
| Phenylalanine, tyrosine and tryptophan biosynthesis | Phenylpyruvic acid                                                                        |
| Steroid hormone biosynthesis                        | 21-Hydroxypregnenolone, 5-Androstenediol, Estrone sulfate, 2-Methoxyestrone 3-glucuronide |
| D-Glutamine and D-glutamate metabolism              | L-Glutamine                                                                               |
| Nitrogen metabolism                                 | L-Glutamine                                                                               |
| Ubiquinone and other terpenoid-quinone biosynthesis | Vitamin K1                                                                                |
| Pyrimidine metabolism                               | L-Glutamine, Uracil                                                                       |
| N-Glycan biosynthesis                               | Dolichyl phosphate D-mannose, Dolichyl b-D-glucosyl phosphate                             |
| Drug metabolism - other enzymes                     | Irinotecan, alpha-Fluoro-beta-alanine                                                     |
| Caffeine metabolism                                 | Caffeine                                                                                  |
| Phenylalanine metabolism                            | Phenylpyruvic acid                                                                        |

|                                                        |                                 |
|--------------------------------------------------------|---------------------------------|
| Glycosylphosphatidylinositol (GPI)-anchor biosynthesis | Dolichyl phosphate D-mannose    |
| Mannose type O-glycan biosynthesis                     | Dolichyl phosphate D-mannose    |
| Pentose and glucuronate interconversions               | D-Xylitol                       |
| beta-Alanine metabolism                                | Uracil                          |
| Sphingolipid metabolism                                | Ceramide (d18:1/12:0)           |
| Alanine, aspartate and glutamate metabolism            | L-Glutamine                     |
| Glyoxylate and dicarboxylate metabolism                | L-Glutamine                     |
| Fatty acid elongation                                  | 3-Oxotetradecanoyl-CoA          |
| Arginine and proline metabolism                        | 4-Hydroxyproline                |
| Fatty acid degradation                                 | 3-Oxotetradecanoyl-CoA          |
| Tryptophan metabolism                                  | 5-Hydroxy-L-tryptophan          |
| Aminoacyl-tRNA biosynthesis                            | L-Glutamine                     |
| Drug metabolism - cytochrome P450                      | Citalopram aldehyde             |
| Metabolism of xenobiotics by cytochrome P450           | Aflatoxin B1exo-8,9-epoxide-GSH |

---

**Exclusive in *S. aureus* exposed *C. elegans* endo-metabolome not in endo-metabolome of *E. coli* OP50 & *S. Typhi* exposed *C. elegans***

---

|                                                     |                                        |
|-----------------------------------------------------|----------------------------------------|
| alpha-Linolenic acid metabolism                     | 3-Oxo-OPC8-CoA, trans-2-Enoyl-OPC6-CoA |
| Ubiquinone and other terpenoid-quinone biosynthesis | Vitamin K1                             |
| One carbon pool by folate                           | Folic acid                             |
| Glycerolipid metabolism                             | TG(10:0/10:0/10:0)                     |
| Pentose and glucuronate interconversions            | L-Arabinose                            |
| Selenocompound metabolism                           | Selenomethionine                       |
| Pyruvate metabolism                                 | Acetylphosphate                        |
| Propanoate metabolism                               | Propinol adenylate                     |
| Folate biosynthesis                                 | Folic acid                             |
| Porphyrin and chlorophyll metabolism                | Cob(I)yrinate,c diamide                |
| Pyrimidine metabolism                               | Thymine                                |

Drug metabolism - cytochrome P450 2-Ethylidene-1,5-dimethyl-3,3-diphenylpyrrolidine

Steroid hormone biosynthesis Deoxycorticosterone

---

**Exclusive in *S. aureus* exposed *C. elegans* exo-metabolome not in exo-metabolome of *E. coli* OP50 & *S. Typhi* exposed *C. elegans***

---

Terpenoid backbone biosynthesis Dimethylallylpyrophosphate

beta-Alanine metabolism Spermidine

Glutathione metabolism Spermidine

Arginine and proline metabolism Spermidine

---

**Exclusive in *S. Typhi* exposed *C. elegans* endo-metabolome not in endo-metabolome of *E. coli* OP50 & *S. aureus* exposed *C. elegans***

---

Drug metabolism - cytochrome P450 4-Glutathionyl cyclophosphamide, Alcophosphamide, Citalopram propionic acid

Arginine and proline metabolism Phosphocreatine, 4-Guanidinobutanoic acid

Biotin metabolism Biocytin

alpha-Linolenic acid metabolism trans-2-Enoyl-OPC4-CoA

Arginine biosynthesis N-Acetylglutamic acid

Histidine metabolism 3-Methylhistidine

Terpenoid backbone biosynthesis Dimethylallylpyrophosphate

Pentose phosphate pathway 6-Phosphonoglucono-D-lactone

Phosphatidylinositol signaling system 1D-myo-Inositol 1,5-bis(diphosphate) 2,3,4,6-tetrakisphosphate

Porphyrin and chlorophyll metabolism Porphobilinogen

Fatty acid elongation Lauroyl-CoA

Fatty acid degradation Lauroyl-CoA

N-Glycan biosynthesis Dolichyl b-D-glucosyl phosphate

Tryptophan metabolism 6-Hydroxymelatonin

Purine metabolism Deoxyadenosine triphosphate

Steroid hormone biosynthesis Androsterone glucuronide

---

**Exclusive in *S. Typhi* exposed *C. elegans* exo-metabolome not in exo-metabolome of *E. coli* OP50 & *S. aureus* exposed *C. elegans***

---

Selenocompound metabolism Selenomethionine, Trimethylselenonium

Steroid hormone biosynthesis Tetrahydrocortisol, Androsterone glucuronide, Dehydroepiandrosterone



|                                       |                                          |
|---------------------------------------|------------------------------------------|
| alpha-Linolenic acid metabolism       | OPC4-CoA                                 |
| Pantothenate and CoA biosynthesis     | Pantetheine                              |
| Phosphatidylinositol signaling system | Phosphatidylinositol-3,4,5-trisphosphate |
| Inositol phosphate metabolism         | Phosphatidylinositol-3,4,5-trisphosphate |
| Drug metabolism - other enzymes       | 5-Fluorouridine                          |
| Tryptophan metabolism                 | Melatonin                                |
| Tyrosine metabolism                   | Tyramine                                 |
| Drug metabolism - cytochrome P450     | 4-Glutathionyl cyclophosphamide          |
| Purine metabolism                     | 5-Aminoimidazole ribonucleotide          |

28

29 **Supplementary table 3: The significantly upregulated and downregulated metabolites of**  
30 **endo-metabolome during candidate pathogenic bacteria interaction than the control (*E.***  
31 ***coli* OP50 exposed *C. elegans*)**

| Compound name<br>(Up regulated in SA<br>exposure)                                                                                                                          | Fold<br>change<br>(log 10) | Compound name<br>(Down regulated in SA<br>exposure) | Fold<br>change<br>(log 10) | Compound name<br>(Up regulated in ST exposure)                                                                                                                     | Fold<br>change<br>(log 10) | Compound name<br>(Down regulated in ST<br>exposure) | Fold<br>change<br>(log 10) |
|----------------------------------------------------------------------------------------------------------------------------------------------------------------------------|----------------------------|-----------------------------------------------------|----------------------------|--------------------------------------------------------------------------------------------------------------------------------------------------------------------|----------------------------|-----------------------------------------------------|----------------------------|
|                                                                                                                                                                            |                            |                                                     |                            |                                                                                                                                                                    |                            | (S)-Lisofylline                                     | -1.33066                   |
|                                                                                                                                                                            |                            |                                                     |                            |                                                                                                                                                                    |                            | 4-sec-Butylphenol                                   | -1.5261                    |
| 2-Methyl-3-<br>thiophenethiol                                                                                                                                              | 0.584736                   | (S)-Lisofylline                                     | -1.71503                   | 2-Methyl-3-thiophenethiol                                                                                                                                          | 0.463019                   | 5beta-scymanol sulfate                              | -0.35263                   |
| 3-Phenylpropyl<br>glucosinolate                                                                                                                                            | 0.690747                   | 4-sec-Butylphenol                                   | -3.50211                   | 3-Phenylpropyl glucosinolate                                                                                                                                       | 0.036654                   | 5-Oxoavermectin "1b"<br>aglycone                    | -0.14162                   |
| 4,4-Bis(p-<br>fluorophenyl)butyric<br>acid                                                                                                                                 | 0.291838                   | 5beta-scymanol sulfate                              | -2.16221                   | 4,4-Bis(p-<br>fluorophenyl)butyric acid                                                                                                                            | 0.208235                   | 6-<br>Methyltetrahydropterin                        | -1.20552                   |
| 5,8,10,14-<br>Eicosatetraenoic acid,<br>12-hydroxy-, (E,Z,Z,Z)-;<br>12-HETE; 12-Hydroxy-<br>5,8,10,14-<br>eicosatetraenoic acid;<br>12-<br>Hydroxyeicosatetraenoic<br>acid | 0.911476                   | 5-Oxoavermectin "1b"<br>aglycone                    | -0.93058                   | 5,8,10,14-Eicosatetraenoic<br>acid, 12-hydroxy-, (E,Z,Z,Z)-;<br>12-HETE; 12-Hydroxy-<br>5,8,10,14-eicosatetraenoic<br>acid; 12-<br>Hydroxyeicosatetraenoic<br>acid | 0.325073                   | Austinol                                            | -1.43394                   |
| Ala Ala Arg                                                                                                                                                                | 0.332969                   | 6-<br>Methyltetrahydropterin                        | -1.29108                   | Ala Ala Arg                                                                                                                                                        | 0.294183                   | Butyl 4'-O-<br>hexadecanoyl-<br>neohesperidoside    | -1.08807                   |
| alpha-Solamarine                                                                                                                                                           | 0.430817                   | Austinol                                            | -1.6803                    | alpha-Solamarine                                                                                                                                                   | 0.27594                    | C8-Dihydroceramide                                  | -1.60567                   |
| CDP-4-dehydro-6-deoxy-<br>D-glucose                                                                                                                                        | 0.295421                   | Butyl 4'-O-<br>hexadecanoyl-<br>neohesperidoside    | -2.59356                   | CDP-4-dehydro-6-deoxy-D-<br>glucose                                                                                                                                | 0.445594                   | Cyclohex-2-enone                                    | -1.14363                   |

|                                                       |          |                                      |          |                                                       |          |                                      |          |
|-------------------------------------------------------|----------|--------------------------------------|----------|-------------------------------------------------------|----------|--------------------------------------|----------|
| cholest-5,24-dien-3beta-ol 3-O-beta-D-glucopyranoside | 0.43896  | C8-Dihydroceramide                   | -2.11284 | cholest-5,24-dien-3beta-ol 3-O-beta-D-glucopyranoside | 0.344063 | D-Tagatose                           | -1.5429  |
| Citroside A                                           | 0.847243 | Cyclohex-2-enone                     | -1.20331 | Citroside A                                           | 0.052325 | Feruloylcholine                      | -1.14838 |
| ent-8(17),13(16),14-Labdatrien-18-oic acid            | 1.119253 | D-Tagatose                           | -2.10021 | ent-8(17),13(16),14-Labdatrien-18-oic acid            | 0.256008 | Harderoporphyrinogen                 | -0.28927 |
| Estradiol acetate                                     | 0.492893 | Feruloylcholine                      | -1.32584 | Estradiol acetate                                     | 0.040643 | Heliotrine                           | -1.5321  |
| Fumitremorgin C                                       | 0.243259 | Harderoporphyrinogen                 | -2.27447 | Fumitremorgin C                                       | 0.335692 | Lys Met Lys                          | -1.37724 |
| His Lys Lys                                           | 0.426283 | Heliotrine                           | -0.90589 | His Lys Lys                                           | 0.316375 | N4-Acetylaminobutanal                | -1.31069 |
| Hydroxyphthioceranic acid (C39)                       | 0.890869 | Lys Met Lys                          | -2.03929 | Hydroxyphthioceranic acid (C39)                       | 0.637303 | PA(18:3(9Z,12Z,15Z)/17:2(9Z,12Z))    | -1.26358 |
| Ismine                                                | 0.455505 | N4-Acetylaminobutanal                | -1.93232 | Ismine                                                | 0.057552 | PG(P-16:0/20:5(5Z,8Z,11Z,14Z,17Z))   | -1.10612 |
| Leu Phe Ala                                           | 0.696486 | PA(18:3(9Z,12Z,15Z)/17:2(9Z,12Z))    | -1.62984 | Leu Phe Ala                                           | 0.318072 | Phenylglyoxylic acid                 | -0.57203 |
| N-stearoyl valine                                     | 0.024244 | PG(P-16:0/20:5(5Z,8Z,11Z,14Z,17Z))   | -2.01468 | N-stearoyl valine                                     | 0.247816 | p-Isopropylphenol                    | -0.67252 |
| Orotinichalcone                                       | 0.977633 | Phenylglyoxylic acid                 | -1.78879 | Orotinichalcone                                       | 1.02651  | PM-toxin B                           | -1.28172 |
| PC(22:6(4Z,7Z,10Z,13Z,16Z,19Z)/13:0)                  | 0.192519 | p-Isopropylphenol                    | -4.29213 | PC(22:6(4Z,7Z,10Z,13Z,16Z,19Z)/13:0)                  | 0.585626 | Prenylbenzoquinone                   | -0.52132 |
| PE(22:6(4Z,7Z,10Z,13Z,16Z,19Z)/15:0)                  | 0.049322 | PM-toxin B                           | -1.11612 | PE(22:6(4Z,7Z,10Z,13Z,16Z,19Z)/15:0)                  | 0.63848  | PS(22:6(4Z,7Z,10Z,13Z,16Z,19Z)/18:0) | -1.44835 |
| PI(17:2(9Z,12Z)/0:0)                                  | 0.315335 | Prenylbenzoquinone                   | -3.17291 | PI(17:2(9Z,12Z)/0:0)                                  | 0.333648 | Syringolin A                         | -1.05657 |
| Pro Asp Arg                                           | 0.351919 | PS(22:6(4Z,7Z,10Z,13Z,16Z,19Z)/18:0) | -1.03664 | Theaspirane                                           | 0.958223 | Tricycloekasantal                    | -1.7397  |
| Tanacetol B                                           | 0.456605 | Syringolin A                         | -2.08308 | Valyl-Serine                                          | 0.449849 | Tyr Thr Lys                          | -1.4578  |
| Theaspirane                                           | 0.678695 | Tricycloekasantal                    | -2.88689 |                                                       |          | Pro Asp Arg                          | -0.13271 |
| Valyl-Serine                                          | 0.564426 | Tyr Thr Lys                          | -1.64205 |                                                       |          | Tanacetol B                          | -0.25358 |

32

33 **Supplementary table 4: The significantly upregulated and downregulated metabolites of**  
34 **exo-metabolome during candidate pathogenic bacteria interaction than the control (*E. coli***  
35 **OP50 exposed *C. elegans*).**

| Compound name (Up regulated in SA exposure)                                  | Fold change (log 10) | Compound name (Down regulated in SA exposure)                                                                                                             | Fold change (log 10) | Compound name (Down regulated in ST exposure)                                                                                                             | Fold change (log 10) | Compound name (Up regulated in ST infected)              | Fold change (log 10) |
|------------------------------------------------------------------------------|----------------------|-----------------------------------------------------------------------------------------------------------------------------------------------------------|----------------------|-----------------------------------------------------------------------------------------------------------------------------------------------------------|----------------------|----------------------------------------------------------|----------------------|
| 1-(3,4-Dimethoxyphenyl)-1,2-ethanediol 1-O-b-D-glucoside                     | 0.428786             | (6RS)-22-oxo-23,24,25,26,27-pentanorvitamin D3 6,19-sulfur dioxide adduct / (6RS)-22-oxo-23,24,25,26,27-pentanorcholecalciferol 6,19-sulfurdioxide adduct | -1.93672             | (6RS)-22-oxo-23,24,25,26,27-pentanorvitamin D3 6,19-sulfur dioxide adduct / (6RS)-22-oxo-23,24,25,26,27-pentanorcholecalciferol 6,19-sulfurdioxide adduct | -0.08874             | 1-(3,4-Dimethoxyphenyl)-1,2-ethanediol 1-O-b-D-glucoside | 0.351605             |
| 1-Heptadecene                                                                | 0.452724             | (S)-1-Phenylethanol                                                                                                                                       | -2.22319             | (S)-1-Phenylethanol                                                                                                                                       | -0.472               | 1-Heptadecene                                            | 0.330151             |
| 1-Methoxy-1-(2,4,5-trimethoxyphenyl)-2-propanol                              | 0.965471             | 13Z-Docosenamide                                                                                                                                          | -2.62022             | 13Z-Docosenamide                                                                                                                                          | -1.27589             | 1-Methoxy-1-(2,4,5-trimethoxyphenyl)-2-propanol          | 0.042796             |
| 24R-methylcholest-22E-en-3beta,4beta,5alpha,6alpha,8beta,14alpha,15alpha,25R | 0.928296             | 1α-hydroxy-24-(dimethoxyphosphoryl)-25,26,27-trinorvitamin D3 / 1α-hydroxy-24-                                                                            | -0.11133             | 2-Aminomuconate 6-semialdehyde                                                                                                                            | -1.26691             | Hexamethylphosphoramide                                  | 1.066289             |

|                                      |          |                                                      |          |                                                                                       |          |                                                                                                                                                     |
|--------------------------------------|----------|------------------------------------------------------|----------|---------------------------------------------------------------------------------------|----------|-----------------------------------------------------------------------------------------------------------------------------------------------------|
| ,26-nonol                            |          | (dimethoxyphosphoryl)-25,26,27-trinorcholecalciferol |          |                                                                                       |          |                                                                                                                                                     |
| 2-Phenylethyl beta-D-glucopyranoside | 0.257579 | 2-Aminomuconate 6-semialdehyde                       | -0.95941 | 3,8-Dihydroxy-6-methoxy-7(11)-eremophilen-12,8-olide                                  | -1.33323 | 2-Phenylethyl beta-D-glucopyranoside 0.328514                                                                                                       |
| 6-Hydroxymelatonin                   | 0.283146 | 3,8-Dihydroxy-6-methoxy-7(11)-eremophilen-12,8-olide | -1.48411 | 4-sec-Butylphenol                                                                     | -0.63387 | 6-Hydroxymelatonin 0.160474                                                                                                                         |
| 7-hydroxy Tetranorlloprost           | 0.709466 | 4-sec-Butylphenol                                    | -2.69327 | 4Z,8-Nonadienal                                                                       | -0.2823  | 7-hydroxy Tetranorlloprost 0.267326                                                                                                                 |
| 9,10-EOT                             | 0.930467 | 4Z,8-Nonadienal                                      | -1.06848 | 5beta-Cholest-25-ene-3alpha,7alpha,12alpha,26-tetrol                                  | -1.65311 | 9,10-EOT 0.326302                                                                                                                                   |
| Arg TrpTrp                           | 0.22936  | 5beta-Cholest-25-ene-3alpha,7alpha,12alpha,26-tetrol | -0.4481  | 5beta-Cholestane-3alpha,26-diol                                                       | -0.86506 | Arg TrpTrp 0.15541                                                                                                                                  |
| Demethoxyfunitremorgin C             | 0.523887 | 5beta-Cholestane-3alpha,26-diol                      | -1.46482 | 5-Ethyl-2-hexyl-4-methyloxazole                                                       | -0.32983 | Demethoxyfunitremorgin C 0.199925                                                                                                                   |
| Lamioside                            | 0.476462 | 5-Ethyl-2-hexyl-4-methyloxazole                      | -3.75027 | 5-Oxo-2(5H)-isoxazolepropanenitrile                                                   | -0.46799 | 1alpha-hydroxy-24-(dimethoxyphosphoryl)-25,26,27-trinorvitamin D3 / 1alpha-hydroxy-24-(dimethoxyphosphoryl)-25,26,27-trinorcholecalciferol 0.591177 |
| Riboflavin (Vitamin B2)              | 0.601615 | 5-Oxo-2(5H)-isoxazolepropanenitrile                  | -1.13671 | 6,8-Docosanedione                                                                     | -1.15321 | S-Japonin 0.394269                                                                                                                                  |
| S-Japonin                            | 1.054933 | 6,8-Docosanedione                                    | -2.29053 | 6-Hydroxy-4-nonadecanone                                                              | -0.26873 | TrpTrp Val 0.230647                                                                                                                                 |
| TrpTrp Val                           | 0.280488 | 6-Hydroxy-4-nonadecanone                             | -1.74213 | 7,7-Dimethyl-5,8-Eicosadienoic Acid                                                   | -1.11901 | Trp-Nap-OH 0.228575                                                                                                                                 |
| Trp-Nap-OH                           | 0.236097 | 7,7-Dimethyl-5,8-Eicosadienoic Acid                  | -1.50148 | 7-Tridecynoic acid                                                                    | -1.3257  | Z-Gly-Pro-Leu-Gly-Pro 0.010976                                                                                                                      |
| Z-Gly-Pro-Leu-Gly-Pro                | 0.135713 | 7-Tridecynoic acid                                   | -1.334   | 9Z-Nonadecene                                                                         | -0.06466 |                                                                                                                                                     |
|                                      |          | 9Z-Nonadecene                                        | -1.92597 | Asn Ile Phe                                                                           | -2.39073 |                                                                                                                                                     |
|                                      |          | Asn Ile Phe                                          | -1.58698 | Atracurium (Quaternary acid)                                                          | -1.78443 |                                                                                                                                                     |
|                                      |          | Atracurium (Quaternary acid)                         | -1.92172 | Butyl 4'-O-hexadecanoyl-neohesperidoside                                              | -1.15873 |                                                                                                                                                     |
|                                      |          | Butyl 4'-O-hexadecanoyl-neohesperidoside             | -2.74982 | Eicosanoyl-EA                                                                         | -2.54928 |                                                                                                                                                     |
|                                      |          | Eicosanoyl-EA                                        | -1.98939 | GlcCer(d15:1/22:0)                                                                    | -2.44808 |                                                                                                                                                     |
|                                      |          | GlcCer(d15:1/22:0)                                   | -1.04321 | Ipomeatetrahydrofuran                                                                 | -1.20838 |                                                                                                                                                     |
|                                      |          | Hexamethylphosphoramidate                            | -0.1967  | L-Alloisoleucine                                                                      | -1.34798 |                                                                                                                                                     |
|                                      |          | Ipomeatetrahydrofuran                                | -1.77517 | LY255283                                                                              | -1.28955 |                                                                                                                                                     |
|                                      |          | L-Alloisoleucine                                     | -1.24423 | Lys Ala Val                                                                           | -0.03017 |                                                                                                                                                     |
|                                      |          | LY255283                                             | -1.06476 | Orotinichalcone                                                                       | -2.23979 |                                                                                                                                                     |
|                                      |          | Lys Ala Val                                          | -1.75849 | PAC-1                                                                                 | -2.04836 |                                                                                                                                                     |
|                                      |          | Orotinichalcone                                      | -1.89731 | PE(13:0/0:0)                                                                          | -2.30978 |                                                                                                                                                     |
|                                      |          | PAC-1                                                | -2.22259 | Stearyl citrate                                                                       | -1.53054 |                                                                                                                                                     |
|                                      |          | PE(13:0/0:0)                                         | -2.76055 | Tanacetol B                                                                           | -0.8456  |                                                                                                                                                     |
|                                      |          | Stearyl citrate                                      | -0.69271 | Tricycloekasantal                                                                     | -0.23168 |                                                                                                                                                     |
|                                      |          | Tanacetol B                                          | -1.17684 | Lamioside                                                                             | -0.42487 |                                                                                                                                                     |
|                                      |          | Tricycloekasantal                                    | -3.46125 | Riboflavin (Vitamin B2)                                                               | -0.18396 |                                                                                                                                                     |
|                                      |          |                                                      |          | 24R-methylcholest-22E-en-3beta,4beta,5alpha,6alpha,8beta,14alpha,15alpha,25R,26-nonol | -0.0027  |                                                                                                                                                     |

36

37

38

39

40

41
