# Supplementary material for: Distinct global metabolomic profiles of the model organism Caenorhabditis elegans during interactions with Staphylococcus aureus and Salmonella enterica Serovar Typhi
Source: Royal Society of Chemistry journal article supplement (doi:10.1039/d3mo00040k), 2023-04-27
Supplement: d3mo00040k4.xlsx [file d3mo00040k4.xlsx]

## Sheet: Supplementary table 1
Supplementary table 1
2114 -exclusively in Control (E. coli OP50 exposed C. elegans) Endo-metabolome and not in exo-metabolome	987 - exclusively in Control (E. coli OP50 exposed C. elegans) Exo-meteabolome and not in endo-metabolome	1962 - exclusively in "Control (E. coli OP50 exposed C. elegans) Endo-metabolome and not in S. aureus or S. Typhi exposed C. elegans	666-exclusively in S. aureus exposed C. elegans Endo-metabolome and not in S. Typhi and E. coli OP50 exposed C. elegans	809 -exclusively in S. Typhi exposed C. elegans Endo-metabolome and not in S. aureus and E. coli OP50 exposed C. elegans	1863 -exclusively in Control (E. coli OP50 exposed C. elegans) Exo-metabolome and not in S. aureus and S. Typhi exposed C. elegans	77-exclusively in S. aureus exposed C. elegans exo-metabolome and not in S. Typhi or E. coli OP50 exposed C. elegans	1080 -exclusively in S. Typhi exposed C. elegans exo-metabolome and not in S. aureus or E. coli OP50 exposed C. elegans
(-)-11-nor-9-carboxy-Δ9-THC-d3	(-)-(E)-1-(4-Hydroxyphenyl)-7-phenyl-6-hepten-3-ol	(-)-11-hydroxy-9,10-dihydrojasmonic acid 11-beta-D-glucoside	(-)-Neplanocin A	(-)-(E)-1-(4-Hydroxyphenyl)-7-phenyl-6-hepten-3-ol	(-)-(E)-1-(4-Hydroxyphenyl)-7-phenyl-6-hepten-3-ol	(17alpha,23S)-17,23-Epoxy-29-hydroxy-27-norlanosta-1,8-diene-3,15,24-trione	(-)-Jamine
(-)-Folicanthine	(-)-Euphomine	(-)-11-nor-9-carboxy-Δ9-THC-d3	(±)-SLV 319	(-)-Euphomine	(-)-11-hydroxy-9,10-dihydrojasmonic acid 11-beta-D-glucoside	(5Z)-1,25-dihydroxy-3-thiavitamin D3 / (5Z)-1,25-dihydroxy-3-thiacholecalciferol	(-)-Linderatin
(-)-Linderatin	(-)-Hygroline	(-)-Epinephrine	(±)-UR-144 N-(4-hydroxypentyl) metabolite	(-)-Jamine	(-)-Helvolic acid	1-(8-[5]-ladderane-octanyl)-2-(8-[3]-ladderane-octanyl)-sn-glycerophosphocholine	(-)-Neolinderatin
(-)-Neolinderatin	(-)-Neplanocin A	(-)-Isolonchocarpin	(23S,25R)-14alpha,17alpha,23-trihydroxyspirost-5-en-3beta-yl O-alpha-L-rhamnopyranosyl-(1-2)-beta-D-glucopyranoside	(-)-Methallenestrilphenol	(-)-Isolonchocarpin	10,11-Dihydro-10,11-dihydroxyprotriptyline	(-)-Pyrifolidine
(-)-Pellotine	(+)-Tephrorin B	(-)-Pellotine	(2S)-2'-Methoxykurarinone	(+/-)-5-[(tert-Butylamino)-2'-hydroxypropoxy]-1,2,3,4-tetrahydro-1-naphthol	(+)-gamma-Hydroxy-L-homoarginine	11-Methoxy-vinorine	(-)-Sedamine
(-)-Solenopsin A	(+/-)-2,16,16-trimethyl-5,8,11,14-all-cis-docosatetraenoyl-2'-fluoroethyamine	(-)-Tortuosamine	(2S,2'S)-Pyrosaccharopine	(±)11,12-EpETrE-d8	(+)-Scalarin	1-Octen-3-yl glucoside	(-)-Tortuosamine
(-)-Tortuosamine	(±)11,12-DHET-d11	(+)-gamma-Hydroxy-L-homoarginine	(3xi,6E)-1,7-Diphenyl-6-hepten-3-ol	(±)-Flurbiprofen	(+)-Tephrorin B	2-(1h-1,2,4-triazol-5-yl)-1h-isoindole-1,3(2h)-dione	(+)-Desoxyscalarin
(+)-Desoxyscalarin	(±)11,12-EpETrE-d8	(+)-Scalarin	(5E)-(3S)-1alpha,25-dihydroxy-3-deoxy-3-thiavitamin D3 3-oxide / (5E)-(3S)-1alpha,25-dihydroxy-3-deoxy-3-thiacholecalciferol 3-oxide	(±)-Leptophos	(+/-)-2,16,16-trimethyl-5,8,11,14-all-cis-docosatetraenoyl-2'-fluoroethyamine	2-(3-pyridyl)-Benzimidazole	(+)-threo-2-Amino-3,4-dihydroxybutanoic acid
(+)-Eudesmin	(±)2-Methyl Arachidonoyl-2'-Fluoroethylamide;	(+/-)-2,16,-dimethyl-5,8,11,14-all-cis-docosatetraenoyl-2'-fluoroethylamine	(5E,17Z)-18-bromo-octadeca-5,17-diene-15-ynoic acid	(22E,24E,24bE)-1α,25-dihydroxy-26,27-dimethyl-22,23,24,24a,24b,24c-hexadehydro-24a,24b,24c-trihomovitamin D3 / (22E,24E,24bE)-1α,25-dihydroxy-26,27-dimethyl-22,23,24,24a,24b,24c-hexadehydro-24a,24b,24c-trihomocholecalciferol	(±)11,12-DHET-d11	2,6-Dihydroxypseudooxynicotine	(+/-)-2,8-Epithio-cis-p-menthane
(+)-Setoclavine	(±)Fenfluramine	(+/-)-6-Acetonyldihydrochelerythrine	(6E,8E)-4,6,8-Megastigmatriene	(25S)-26-Hydroxy-24-methylenecycloartan-3-one	(±)11,12-EpETrE-d8	2-Chloro-1-propanol	(+/-)-3-[(2-methyl-3-furyl)thio]-2-butanone
(+)-threo-2-Amino-3,4-dihydroxybutanoic acid	(10S)-Juvenile hormone III diol phosphate	(±)13-Azaprostanoic acid	(E,E)-1,7-Diphenyl-4,6-heptadien-3-ol	(2R,4R)-tert-butyl 4-(hydroxymethyl)-2-phenylthiazolidine-3-carboxylate	(±)2-Methyl Arachidonoyl-2'-Fluoroethylamide;	2-Ethylethcathinone	(+/-)-5-[(tert-Butylamino)-2'-hydroxypropoxy]-1,2,3,4-tetrahydro-1-naphthol
(+/-)-2,16,-dimethyl-5,8,11,14-all-cis-docosatetraenoyl-2'-fluoroethylamine	(1R,6S)-6-Amino-5-oxocyclohex-2-ene-1-carboxylate	(±)-alpha-Narcotine	(E,E)-3,7,11-Trimethyl-2,6,10-dodecatrienyl decanoate	(2S,4S)-Monatin	(±)-4-Methylene-2-pyrrolidinecarboxylic acid	2-hydroxy-4- (methylthio) butyric acid	(±)-Desethylhydroxychloroquine
(+/-)-6-Acetonyldihydrochelerythrine	(23S)-23,25-dihdroxy-24-oxovitamine D3 23-(beta-glucuronide)	(±)-JWH 018 N-(4-hydroxypentyl) metabolite-d5	(R,E)-S-2-acetamido-13-(methylamino)-13-oxotridec-3-enyl ethanethioate	(2S,4S)-Pinnatanine	(±)8-Gingerol	2-Hydroxyiminodibenzyl	(±)-Flurbiprofen
(±)1,2-Didecanoyl-glycerol (10:0)	(25R)-26,26,26-trifluoro-1α,25-dihydroxyvitamin D3 / (25R)-26,26,26-trifluoro-1α,25-dihydroxycholecalciferol	(10E)-19-fluorovitamin D3 / (10E)-19-fluorocholecalciferol	(S)-cis-N-methylstylopine	(3b,16a,20R)-3,16,20,22,25-Pentahydroxy-5-cucurbiten-11-one 3-[glucosyl-(1->6)-glucoside]	(±)-JWH 018 N-(4-hydroxypentyl) metabolite-d5	3-Hexaprenyl-4,5-Dihydroxybenzoic acid	(±)-SLV 319
(±)-alpha-Narcotine	(25S)-26-Hydroxy-24-methylenecycloartan-3-one	(14alpha,17beta,20S,22R)-14,20-Epoxy-17-hydroxy-1-oxowitha-3,5,24-trienolide	(S1)-Methoxy-3-heptanethiol	(3b,21b)-12-Oleanene-3,21,28-triol 28-[arabinosyl-(1->3)-arabinosyl-(1->3)-arabinoside]	(10S)-Juvenile hormone III diol phosphate	4,4'-Thiobis-2-butanone	(25R)-5alpha-spirostan-3beta,6alpha,23S-triol 6-O-beta-D-glucopyranoside
(±)-CP 47,497-C8-homolog-d7	(2alpha,3alpha,5alpha,22R,23R)-2,3,22,23-Tetrahydroxy-25-methylergost-24(28)en-6-one	(1alpha,3beta,20S,22R,24S,25S)-Pubescenin	(Z)-2-Hexacos-17-enamidoethanesulfonic acid	(3beta,17alpha,23S)-17,23-Epoxy-3,28,29-trihydroxy-27-norlanost-8-en-24-one	(17Z)-1α,25-dihydroxy-26,27-dimethyl-17,20,22,22,23,23-hexadehydrovitamin D3 / (17Z)-1α,25-dihydroxy-26,27-dimethyl-17,20,22,22,23,23-hexadehydrocholecalciferol	4-Chloroacetanilide	(2R,3R,4R)-2-Amino-4-hydroxy-3-methylpentanoic acid
(10E)-19-fluorovitamin D3 / (10E)-19-fluorocholecalciferol	(2E,6E)-2,6-bis(2-phenylhydrazono)cyclohex-4-ene-1,3-dione	(1R*,3R*,3'S*)-1,2,3,4-Tetrahydro-1-(2-thio-3-pyrrolidinyl)-beta-carboline-3-carboxylic acid	1-(1-Propenylsulfinyl)propyl propyl disulfide	(7'S,8'S)-4,7'-Epoxy-3,8'-bilign-7-ene-3',5-dimethoxy-4',9,9'-triol 4'-glucoside	(1R,6S)-6-Amino-5-oxocyclohex-2-ene-1-carboxylate	5'-(3',4'-dihydroxyphenyl)-gamma-valerolactone sulfate	(2S,2'S)-Pyrosaccharopine
(14alpha,17beta,20S,22R)-14,20-Epoxy-17-hydroxy-1-oxowitha-3,5,24-trienolide	(2S,4S)-Monatin	(1xi,2xi)-1-(4-Hydroxyphenyl)-1,2,3-propanetriol 2-O-beta-D-glucopyranoside	1(2H)-Naphthalenone, 4-(3,4-dichlorophenyl)-3,4-dihydro-, (4S)-	(E,E)-3,7,11-Trimethyl-2,6,10-dodecatrienyl nonanoate	(25R)-26,26,26-trifluoro-1α,25-dihydroxyvitamin D3 / (25R)-26,26,26-trifluoro-1α,25-dihydroxycholecalciferol	5-Amino-6-ribitylamino uracil	(3a,5b,7a,12a), 3,12-dihydroxy-7-(sulfooxy)-Cholan-24-oic acid
(17alpha,23S)-17,23-Epoxy-29-hydroxy-27-norlanosta-1,8-diene-3,15,24-trione	(2S,4S)-Pinnatanine	(22E)-(25S)-26,26,26-trifluoro-1α,25-dihydroxy-22,23-didehydrovitamin D3 / (22E)-(25S)-26,26,26-trifluoro-1α,25-dihydroxy-22,23-didehydrocholecalciferol	1-(2H-1,3-Benzodioxol-5-yl)-2-[2,6-dimethoxy-4-(prop-2-en-1-yl)phenoxy]propyl benzoate	(E,E)-4,4''-Bi(N-4-hydroxycinnamoylserotonin)	(25R)-3alpha,7alpha-dihydroxy-5beta-cholestan-27-oyl taurine	9Z,13-Tetradecadien-11-ynal	(3b,20R,22R)-3,20,27-Trihydroxy-1-oxowitha-5,24-dienolide 3-glucoside
(1alpha,3beta,20S,22R,24S,25S)-Pubescenin	(3beta,24(241)Z)-24-Ethylidenelanost-9(11)-en-3-ol	(23S)-26,26,26,27,27,27-hexafluoro-1α,23,25-trihydroxyvitamin D3 / (23S)-26,26,26,27,27,27-hexafluoro-1α,23,25-trihydroxycholecalciferol	1-(8-[5]-ladderane-octanyl)-2-(8-[3]-ladderane-octanyl)-sn-glycero-3-phospho-(1'-sn-glycerol)	(R)-(E)-Sulforaphene	(25S)-26-Hydroxy-24-methylenecycloartan-3-one	Acetylhydrazinopthalazinone	(3b,6a,12b,20S,23E)-Dammar-23-ene-3,6,12,20,25-pentol 6,20-diglucoside
(1R*,3R*,3'S*)-1,2,3,4-Tetrahydro-1-(2-thio-3-pyrrolidinyl)-beta-carboline-3-carboxylic acid	(3beta,5alpha,6beta,24R)-Stigmastane-3,5,6-triol	(25R)-5alpha-spirostan-3beta,6alpha-diol 6-O-beta-D-glucopyranoside	1,1,2-Trichloro-1,2,2-trifluoroethane	(S)-Codamine	(25S)-5alpha-cholestan-3beta,4beta,6alpha,7beta,8beta,15alpha,16beta,26-octol	Actinidine	(3R,2'S)-Myxol 2'-α-L-fucoside
(1xi,2xi)-1-(4-Hydroxyphenyl)-1,2,3-propanetriol 2-O-beta-D-glucopyranoside	(3S,5R,6R,6'S)-6,7-Didehydro-5,6-dihydro-3,5,6'-trihydroxy-13,14,20-trinor-3'-oxo-beta,epsilon-caroten-19',11'-olide 3-acetate	(25S)-Spirostane-3b,5b,6a-triol 3-[4''-rhamnosylglucoside]	1,2,3,4,7,8-Hexachlorodibenzofuran	(S)-N-[3-(3,4-Methylenedioxyphenyl)-2-(acetylthio)methyl-1-oxoprolyl]-(S)-alanine benzyl ester	(2R*,3R*)-1,2,3-Butanetriol	ADMA	(6E)-Piperamide-C7:1
(20R,24R)-20-fluoro-1α,24-dihydroxy-26,27-cyclovitamin D3 / (20R,24R)-20-fluoro-1α,24-dihydroxy-26,27-cyclocholecalciferol	(5alpha,6beta,14alpha,20R,22R)-5,6,14,20,27-Pentahydroxy-1-oxowith-24-enolide	(2R*,3R*)-1,2,3-Butanetriol	1,25-Dihydroxyvitamin D3-26,23-lactone	1-(2E,6E,10E-phytatrienyl)-2-(2E,6E10E-phytatrienyl)-sn-glycero-3-phosphocholine	(2R,2'R)-3,3'-disulfanediylbis(2-acetamidopropanoic acid)	Ala-Ser-OH	(8E)-Piperamide-C9:1
(20S)-24-Hydroxy-19-norgeminivitamin D3	(6E,8E)-4,6,8-Megastigmatriene	(2R,2'R)-3,3'-disulfanediylbis(2-acetamidopropanoic acid)	1,2-Dihydroxy-8-methylnaphthalene	1-(2E-phytaenyl)-2-(2E-phytaenyl)-sn-glycero-3-phosphocholine	(2S,3S,4S)-5,7,9,11-Tridecatetrayne-1,2,3,4-tetrol	Ammodendrine	(8R,8'R)-Secoisolariciresinol 9-glucoside
(21-Methyl-8Z-pentatriacontene	(7alpha,10beta)-1(10->19)-Abeo-7-acetoxyisoobacun-3,10-olide	(2R,4R)-tert-butyl 2-phenyl-4-vinylthiazolidine-3-carboxylate	1,2-Dimethoxy-13-methyl-[1,3]benzodioxolo[5,6-c]phenanthridine	1-(4-Amino-2-methylpyrimid-5-ylmethyl)-3-(beta-hydroxyethyl)-2-methylpyridinium	(2S,4S)-Monatin	Asn His Val	(E)-1,2-bis(6-methoxyquinolin-4-yl)ethene
(22E)-(25S)-26,26,26-trifluoro-1α,25-dihydroxy-22,23-didehydrovitamin D3 / (22E)-(25S)-26,26,26-trifluoro-1α,25-dihydroxy-22,23-didehydrocholecalciferol	(all-E)-1,7,9-Heptadecatriene-11,13,15-triyne	(2'S)-Deoxymyxol 2'-(2,4-di-O-methyl-α-L-fucoside)	1,3,7-Trimethyluric acid	1-(5-Methyl-3-pyridinyl)-1-decanone	(2S,4S)-Pinnatanine	Benztropine	(E)-4-stilbenol
(22E)-26,26,26,27,27,27-hexafluoro-1α,25-dihydroxy-22,23-didehydrovitamin D3 / (22E)-26,26,26,27,27,27-hexafluoro-1α,25-dihydroxy-22,23-didehydrocholecalciferol	(E)-4,8-Dimethyl-1,3,7-nonatriene	(2'S)-Deoxymyxol 2'-α-L-fucoside	10'-Apo-beta-caroten-10'-al	1-(6-[3]-ladderane-hexanoyl)-2-(8-[3]-ladderane-octanyl)-sn-glycero-3-phospho-(1'-sn-glycerol)	(3''-Apiosyl-6''-malonyl)astragalin	Buturon	(E)-Avenanthramide D
(22S)-Acetoxy-3alpha,15alpha-dihydroxylanosta-7,9(11),24-trien-26-oic acid	(E)-Arachidin II	(2S,4S,6S)-2-[2-(4-Hydroxy-3-meyhoxyphenyl)ethyl]tetrahydro-6-(4,5-dihydroxy-3-methoxyphenyl)-2H-pyran-4-yl 4-acetate	11,15,19-Trimethylheptatriacontane	1-(8-[5]-ladderane-octanoyl)-2-(8-[3]-ladderane-octanyl)-sn-glycero-3-phospho-(1'-sn-glycerol)	(3beta,24(241)Z)-24-Ethylidenelanost-9(11)-en-3-ol	C-12 NBD-dihydro-Ceramide	(E)-Piperolein A
(23S,24R,25S)-23,24-dihydroxy-spirost-5-en-3beta-yl O-alpha-L-rhamnopyranosyl-(1-2)-beta-D-glucopyranoside	(E,E)-3,7,11-Trimethyl-2,6,10-dodecatrienyl octanoate	(3alpha,5beta,11beta,17beta)-9-Fluoro-17-methylandrostane-3,11,17-triol	12alpha-Fluoro-11beta,17beta-dihydroxyandrosta-1,4-dien-3-one	1-(O-alpha-D-glucopyranosyl)-(1,3R,27R)-octaconsanetriol	(3beta,5alpha,6beta,24R)-Stigmastane-3,5,6-triol	Centellasapogenol A	(E,E)-2,4-Decadienoic isobutylamide
(25R)-5alpha-spirostan-3beta,6alpha,23S-triol 6-O-beta-D-glucopyranoside	(E,E)-4,4''-Bi(N-4-hydroxycinnamoylserotonin)	(3''-Apiosyl-6''-malonyl)astragalin	12-Dehydroporson	1,10-Phenanthroline	(3S)-3,6-Diaminohexanoate	cholest-5,24-dien-3beta-ol 3-O-beta-D-glucopyranoside	(R)-Pantothenic acid 4'-O-b-D-glucoside
(25R)-5alpha-spirostan-3beta,6alpha-diol 6-O-beta-D-glucopyranoside	(R)-(E)-Sulforaphene	(3R,2'S)-Myxol 2'-α-L-fucoside	16-hydroxy-18-bromo-8E,17E19Z-tricosatrien-4,6-diynoic acid	1,2,3,4-Tetrachlorobenzene	(3S,2'S)-4-Ketomyxol 2'-α-L-fucoside	Codonocarpine	(S)-Neolitsine
(25S)-5beta-spirostan-3beta-yl beta-D-glucoside	(R)-Rhazinilam	(3S,2'S)-4-Ketomyxol 2'-α-L-fucoside	17alpha-Chloroethynylestradiol	1,2,4-Trichlorobenzene	(3S,5R,6R,6'S)-6,7-Didehydro-5,6-dihydro-3,5,6'-trihydroxy-13,14,20-trinor-3'-oxo-beta,epsilon-caroten-19',11'-olide 3-acetate	D1927	(S)-Nerolidol 3-O-[a-L-Rhamnopyranosyl-(1->4)-a-L-rhamnopyranosyl-(1->2)-b-D-glucopyranoside]
(25S)-Spirostane-3b,5b,6a-triol 3-[4''-rhamnosylglucoside]	(R)-Skyrin 2-xyloside	(3S,5R,6R)-3,5-dihydroxy-6,7-didehydro-5,6-dihydro-12'-apo-beta-caroten-12'-al	19-Chloro-3beta-hydroxyandrost-5-en-17-one acetate	1,2,4-Trigalloyl-beta-D-glucopyranose	(3S,7E,9S)-9-Hydroxy-4,7-megastigmadien-3-one 9-glucoside	Delavirdine	[4,8'':4'',8''''-Terflavan]-3,3'',3'''',4',4''',4'''',4''''',5,5'',5'''',7,7'',7''''-tridecol
(2R,3R,4R)-2-Amino-4-hydroxy-3-methylpentanoic acid	(R,E)-S-2-acetamido-13-(methylamino)-13-oxotridec-3-enyl ethanethioate	(3S,7E,9S)-9-Hydroxy-4,7-megastigmadien-3-one 9-glucoside	19-Hydroxy-8-O-methyltetrangulol	1,2-Di(2-pyridyl)ethylene	(6R)-vitamin D3 6,19-[4-{2-(6,7-dimethoxy-4-methyl-3-oxo-3,4-dihydroquinoxalinyl)ethyl}-1,2,4-triazoline-3,5-dione] adduct / (6R)-cholecalciferol 6,19-[4-{2-(6,7-dimethoxy-4-methyl-3-oxo-3,4-dihydroquinoxalinyl)ethyl}-1,2,4-triazoline-3,5-dione] adduct	DG(14:0/0:0/14:0) (d5)	1-(10E-Undecenyl)-2-acetyl-sn-glycero-3-phosphocholine
(2'S)-Deoxymyxol 2'-(2,4-di-O-methyl-α-L-fucoside)	(S)-cis-N-methylstylopine	(3xi,6xi)-Cyclo(alanylvalyl)	1-Acetylcyclohexyl acetate	1,2-Di-O-myristoyl-3-O-(6-sulfoquinovopyranosyl)glycerol	(6S)-vitamin D2 6,19-sulfur dioxide adduct / (6S)-ergocalciferol 6,19-sulfur dioxide adduct	DMPP	1-(10-methylhexadecanyl)-2-(8-[3]-ladderane-octanyl)-sn-glycerophosphocholine
(2'S)-Deoxymyxol 2'-α-L-fucoside	(S)-N-[3-(3,4-Methylenedioxyphenyl)-2-(acetylthio)methyl-1-oxoprolyl]-(S)-alanine benzyl ester	(4-Hydroxybenzoyl)choline	1-Guanidino-1-deoxy-scyllo-inositol	1,3,5-Trichloro-(2-methylsulfonyl)benzene	(E)-4,8-Dimethyl-1,3,7-nonatriene	Ergoline-8-methanol, 10-methoxy-6-methyl-, (8b)-	1-(2,6,6-Trimethyl-2-cyclohexen-1-yl)-1,6-heptadien-3-one
(2S,4S,6S)-2-[2-(4-Hydroxy-3-meyhoxyphenyl)ethyl]tetrahydro-6-(4,5-dihydroxy-3-methoxyphenyl)-2H-pyran-4-yl 4-acetate	[12]-Gingerdione	(4R,5S,7R,11S)-11,12-Dihydroxy-1(10)-spirovetiven-2-one 11-glucoside	1'H-5alpha-Cholest-2-eno[3,2-b]indole	10S,11R-epoxy-punaglandin 4	(E)-Arachidin II	Furodysinin	1(3)-glyceryl-6-keto-PGF1α
(3a,5b,7a,12a)-24-[(carboxymethyl)amino]-1,12-dihydroxy-24-oxocholan-3-yl-b-D-Glucopyranosiduronic a	1-(3,4-Dimethoxyphenyl)-1,2-ethanediol 1-O-b-D-glucoside	(5Z)-4,4-difluoro-1α--hydroxyvitamin D3 / (5Z)-4,4-difluoro-1α--hydroxycholecalciferol	1H-Imidazole-4-carboxamide, 5-[3-(hydroxymethyl)-3-methyl-1-triazenyl]-	11-(3-acetoxy-1-propynyl)-1α,25-dihydroxy-9,11-didehydrovitamin D3 / 11-(3-acetoxy-1-propynyl)-1α,25-dihydroxy-9,11-didehydrocholecalciferol	(E,E)-4,4''-Bi(N-4-hydroxycinnamoylserotonin)	Galabiosylceramide (d18:1/18:0)	1-(6-[5]-ladderane-hexanoyl)-2-(8-[3]-ladderane-octanyl)-sn-glycerol
(3alpha,5beta,11beta,17beta)-9-Fluoro-17-methylandrostane-3,11,17-triol	1-(5-Methyl-3-pyridinyl)-1-decanone	(6S)-vitamin D2 6,19-sulfur dioxide adduct / (6S)-ergocalciferol 6,19-sulfur dioxide adduct	1-Isothiocyanato-7-(methylsulfinyl)heptane	11-Methoxy-vinorine	(R)-(E)-Sulforaphene	Glycobismine A	1-(8-[5]-ladderane-octanyl)-2-(8-[3]-ladderane-octanyl)-sn-glycero-3-phospho-(1'-sn-glycerol)
(3-Methylcrotonyl)glycine methyl ester	1-(6-[3]-ladderane-hexanoyl)-2-(8-[3]-ladderane-octanyl)-sn-glycerophosphoethanolamine	(9R,13R)-1a,1b-dihomo-jasmonic acid	1-Isothiocyanato-7-(methylthio)heptane	11-Methylheptacosan-2-one	(R)-(Homo)2-citrate	hexane	1-(8Z,11Z,14Z-Eicosatrienoyl)-sn-glycero-3-phosphocholine
(3R,2'S)-Myxol 2'-α-L-fucoside	1-(O-alpha-D-mannopyranosyl)-29-keto-(1,3R,31R)-dotriacontanetriol	(E)-2-(Methoxycarbonylmethyl)butenedioate	1-Isothiocyanato-8-(methylthio)octane	11α-(fluoromethyl)-1α,25-dihydroxyvitamin D3 / 11α-(fluoromethyl)-1α,25-dihydroxycholecalciferol	(R)-1-O-b-D-glucopyranosyl-1,3-octanediol	Leu Ala Asp	1-(O-alpha-D-glucopyranosyl)-(1,3R,27R)-octaconsanetriol
(3S,5R,6R)-3,5-dihydroxy-6,7-didehydro-5,6-dihydro-12'-apo-beta-caroten-12'-al	1,1'-(OH)2-3,4-Didehydrolycopene	(E)-2-Tetracosenoic acid	1-Methyl-2-cyanopyridinium	13-Methyl-1-hentriacontene	(R)-3-((R)-3-Hydroxybutanoyloxy)butanoate	Leu Leu Gln	1,1,2-Triphenylpropane
(3S,5R,6S,7E,9x)-7-Megastigmene-3,6,9-triol 9-glucoside	1,1,2-Trichloro-1,2,2-trifluoroethane	(E,E)-2,4-Decadienoic isobutylamide	1-NA-PP1	14-O-(beta-D-glucopyranosyl)-7S,14R-dihydroxy-7,9,13,17-tetramethyl-2E,4E,8E,10E,12E,16E-octadecahexaenoic acid	(R)-AMAA	Leukotriene C4 methyl ester	1,1-Diphenyl-2-(4-methoxyphenyl)propene
(3xi,6xi)-Cyclo(alanylvalyl)	1,2,3-Tris(chloromethoxy)propane	(R)-(Homo)2-citrate	1-O-Caffeoyl-(b-D-glucose 6-O-sulfate)	15(S)-15-methyl PGF2α isopropyl ester	(R)-Rhazinilam	Linoleoyl Ethanolamide	1,25-Dihydroxy-20S-21-(3-hydroxy-3-methylbutyl)-23-yne-26,27-hexafluorovitamin D3
(4-Hydroxybenzoyl)choline	1,2,4-Trigalloyl-beta-D-glucopyranose	(R)-1-O-b-D-glucopyranosyl-1,3-octanediol	1-Octen-3-ol-3-o-beta-D-xylopyranosyl(1->6)-beta-D-glucopyranoside	15:1 Cholesteryl ester	(R)-Skyrin 2-xyloside	Manbeta1-4Glcbeta-Cer(d18:1/16:0)	1,25-Dihydroxyvitamin D3-26,23-lactone
(4R,5S,7R,11S)-11,12-Dihydroxy-1(10)-spirovetiven-2-one 11-glucoside	1,2-Benzenediol, 4-[[4-(4-fluorophenyl)-3-piperidinyl]methoxy]-, (3S-trans)-	(R)-3-((R)-3-Hydroxybutanoyloxy)butanoate	1-Octen-3-yl glucoside	16,16-dimethyl Prostaglandin E2 p-(p-acetamidobenzamido) phenyl ester	(R*,S*)-4-[1-Ethyl-2-(4-fluorophenyl)butyl]phenol	Mercaptoacetyl-Phe-Leu	1,2-Di(2-pyridyl)ethylene
(5,12,13-Triaza-indeno[1,2-b]anthracen-13-yl)-acetic acid ethyl ester	1,2-Benzisoxazole, 6-fluoro-3-(4-piperidinyl)-	(R)-AM1241	1-Phenyl-2,4-pentadiyn-1-one	17,18-dehydro-clavulone I	(S)-3-Mercaptohexyl butyrate	Metformin	1,2-di-(9Z,12Z,15Z-octadecatrienoyl)-3-(8-(2E,4Z-decadienoyloxy)-5,6-octadienoyl)-sn-glycerol
(5Z)-1,25-dihydroxy-3-thiavitamin D3 / (5Z)-1,25-dihydroxy-3-thiacholecalciferol	1,3,8-Trihydroxy-4-methyl-2,7-diprenylxanthone	(R)-AMAA	1-Propanamine, N,N-dimethyl-3-(5-oxidodibenzo[b,e]thiepin-11(6H)-ylidene)-, (E)- (9CI)	17beta-(Acetylthio)estra-1,3,5(10)-trien-3-ol acetate	(S)-Annocherine A	Methyl 2,6-dihydroxy-4-quinolinecarboxylate	1,2-Dibromo-3-chloropropane
(8R,8'R)-Secoisolariciresinol 9-glucoside	1,3-Dimethyluracil	(R)-Pantothenic acid 4'-O-b-D-glucoside	1-tetradecanoyl-2-hexadecanoyl-sn-glycero-3-phosphosulfocholine	17-Hydroxypregnenolone sulfate	(S)-ATPA	Metyrapol	1,2-dihexadecanoyl-sn-glycero-3-phosphosulfocholine
(all-E)-1,7-bis(4-hydroxyphenyl)-1,4,6-heptatrien-3-one	1,3-Dipropyl-8-cyclopentylxanthine [DPCPX]	(S)-3-Mercaptohexyl butyrate	1α,25-dihydroxy-11β-(2-hydroxyethyl)vitamin D3 / 1α,25-dihydroxy-11β-(2-hydroxyethyl)cholecalciferol	17-trifluoromethylphenyl trinor PGF2α isopropyl ester	(S)-cis-N-methylstylopine	N-Acetyl-D-fucosamine	1,2-dihydrostilbene
(all-E)-6'-Apo-y-caroten-6'-al	11beta-PGF2alpha-EA	(S)-Annocherine A	1α,25-dihydroxy-26,26,26,27,27,27-hexafluoro-16,17,23,23,24,24-hexadehydro-19-norvitamin D3 / 1α,25-dihydroxy-26,26,26,27,27,27-hexafluoro-16,17,23,23,24,24-hexadehydro-19-norcholecalciferol	18:2 Campesteryl ester	(S)-Lisofylline	Nitrilacarb	1,2-Dioctadecanoyl-3-(galactosyl-B-1-6-galactosyl-B-1)-glycerol
(Cyclohexylmethyl)pyrazine	13(S),14(S)-epoxy Fluprostenol isopropyl ester	(S)-N-(4,5-Dihydro-1-methyl-4-oxo-1H-imidazol-2-yl)alanine	1α-hydroxy-22-(3-methylphenyl)-23,24,25,26,27-pentanorvitamin D3 / 1α-hydroxy-22-(3-methylphenyl)-23,24,25,26,27-pentanorcholecalciferol	18:3 Stigmasteryl ester	(S)-N-[3-(3,4-Methylenedioxyphenyl)-2-(mercaptomethyl)-1-oxoprolyl]glycine	N-tryptophanyl-35-aminobacteriohopane-32,33,34-triol	1,3,7-Trimethyluric acid
(E,E)-2,4-Decadienoic isobutylamide	14-chlorotetracosane-1,15-disulfate	(S)-N-Methylcanadine	2-([4-(2-Chlorophenyl)-5-methoxycarbonyl-3-ethoxycarbonyl-6-methyl-2-pyridyl]methoxyacetic acid	18Z,21Z-Heptacosadien-10-one	(S)-N-Methylcanadine	Oxypinnatanine	11-bromo-undecanoic acid
(R)-AM1241	14-Fluoro-11E-tetradecenyl acetate	(x)-1,2-Propanediol 1-O-b-D-glucopyranoside	2-(1-Propenyl)-delta1-piperideine	1-Acetyl-3,14,20-trihydroxywitha-5,24-dienolide 3-glucoside	(x)-1,2-Propanediol 1-O-b-D-glucopyranoside	PA(12:0/18:2(9Z,12Z))	12beta-hydroxy-24-norcholesta-1,4,22E-trien-3-one
(R)-Pantothenic acid 4'-O-b-D-glucoside	14-fluoro-myristic acid	(x)-2-Heptanol glucoside	2,2-Bis(bromomethyl)propane-1,3-diol	1-Acetylaspidoalbidine	(x)-2-Heptanol glucoside	PA(17:1(9Z)/13:0)	12-Hydroxyergometrine
(S)-25-Hydroxy-14,16-hentriacontanedione	15-keto Fluprostenol isopropyl ester	(Z)-2-Pentacos-16-enamidoethanesulfonic acid	2,2-Dibromo-2-cyanoacetamide	1-Cyano-2-hydroxy-3-butene	(Z)-3-(1-Formyl-1-propenyl)pentanedioic acid	PA(22:0/16:0)	13,17-Dimethylpentatetracontane
(S)-N-(4,5-Dihydro-1-methyl-4-oxo-1H-imidazol-2-yl)alanine	16-Epivellosimine	(Z)-Narceine imide	2',3',5'-triacetyl-5-Azacytidine	1-Ethyl-2-benzimidazolinone	1-(1-Pyrrolidinyl)-2-propanone	PC(19:0/0:0)	13,17-Dimethyltritetracontane
(S)-Neolitsine	16-phenoxy tetranor PGF2α cyclopropyl methyl amide	1-(1-Pyrrolidinyl)-2-propanone	2,3,6-Trichlorobiphenyl	1-hexadecanyl-2-(8-[3]-ladderane-octanyl)-sn-glycerophosphocholine	1-(2,3-Dihydro-1H-pyrrolizin-5-yl)-1,4-pentanedione	PDM 2	13-beta-D-Glucosyloxydocosanoate
(S)-Nerolidol 3-O-[a-L-Rhamnopyranosyl-(1->4)-a-L-rhamnopyranosyl-(1->2)-b-D-glucopyranoside]	17,18-dehydro-clavulone I	1-(2E,6E-phytadienyl)-2-(2E,6E-phytadienyl)-sn-glycero-3-phosphocholine	2,3-Dehydrosilybin	1-Hexadecyl Lysophosphatidic Acid	1-(2-Furanylmethyl)-1H-pyrrole	Pentacosanoic acid	13-Methyl-1-hentriacontene
(Z)-2-Pentacos-16-enamidoethanesulfonic acid	17beta-Hydroxy-2alpha-(methoxymethyl)-17-methyl-5alpha-androstan-3-one	1-(2-Furanylmethyl)-1H-pyrrole	2,3-Diacetoxy-7,8-Epoxy-24,29-Dinor-1,3,5-Friedelatriene-20-Carboxylic Acid	1-Isothiocyanato-2-phenylethane	1-(3,4-Dihydroxyphenyl)-1-decene-3,5-dione	PG(14:1(9Z)/0:0)	14,15-LTD4
(Z)-2-Tetracos-15-enamidoethanesulfonic acid	17beta-Hydroxy-7alpha-mercaptoandrost-4-en-3-one 7-propionate	1-(3-Aminopropyl)-4-aminobutanal	2,3-Dihydro-5-(5-methyl-2-furanyl)-1H-pyrrolizine	1-Isothiocyanato-6-(methylthio)hexane	1-(3-Methyl-2-butenoyl)-6-apiosylglucose	p-Hydroxypropoxyphene	14Z-Tricosene-10-one
(Z)-Narceine imide	17-phenyl trinor Prostaglandin A2	1-(3-Methyl-2-butenoyl)-6-apiosylglucose	2,4,14-Eicosatrienoic acid isobutylamide	1-O-alpha-D-glucopyranosyl-1,2-eicosandiol	1-(4-Hydroxyphenyl)-1-decene-3,5-dione	Pindolol	15(R)-17-phenyl trinor Prostaglandin F2α ethyl amide
1-(10E-Undecenyl)-2-acetyl-sn-glycero-3-phosphocholine	17-phenyl trinor Prostaglandin F2α ethyl amide-d4	1-(6-[3]-ladderane-hexanyl)-2-(8-[3]-ladderane-octanyl)-sn-glycerophosphocholine	2,4,6-Tribromophenol	1-O-alpha-D-glucopyranosyl-1,2-nonadecandiol	1-(5-Hydroxy-2-pyrimidinyl)piperazine	Proacaciberin	15-methoxy-tricosanoic acid
1-(10-methylhexadecanyl)-2-(8-[3]-ladderane-octanyl)-sn-glycerophosphocholine	18-fluoro-9E-octadecenoic acid	1-(6-[5]-ladderane-hexanoyl)-2-(8-[3]-ladderane-octanyl)-sn-glycerophosphocholine	2,4-Dimethyl-5-vinylthiazole	1-O-Desmethyltetrabenazine glucuronide	1-(6-[3]-ladderane-hexanoyl)-2-(8-[3]-ladderane-octanyl)-sn-glycerophosphoethanolamine	PS(20:2(11Z,14Z)/12:0)	16:0 Sitosteryl ester
1-(2E,6E-phytadienyl)-2-(2E,6E-phytadienyl)-sn-glycero-3-phosphocholine	19-norcholestanol	1-(6-[5]-ladderane-hexanyl)-2-(8-[3]-ladderane-octanyl)-sn-glycerophosphocholine	2,9-Bis(3-methyl-2E-pentenoyl)-2b,9a-dihydroxy-4Z,10(14)-oplopadien-3-one	1α-hydroxy-24-(dimethylphosphoryl)-25,26,27-trinorvitamin D3 / 1α-hydroxy-24-(dimethylphosphoryl)-25,26,27-trinorcholecalciferol	1-(6-[5]-ladderane-hexanoyl)-2-(8-[3]-ladderane-octanyl)-sn-glycerophosphoethanolamine	PS(O-20:0/19:1(9Z))	16:1 Campesteryl ester
1-(2-Pyrimidyl)piperazine	1-Acetyl-3,14,20-trihydroxywitha-5,24-dienolide 3-glucoside	1-(8-[5]-ladderane-octanoyl)-2-(8-[3]-ladderane-octanyl)-sn-glycerophosphocthanolamine	20:2 Stigmasteryl ester	2- (2,6-Dimethoxyphenoxyethyl)Aminomethyl-1,4-Benzodioxane (WB 4101)	1-(8-[3]-ladderane-octanoyl-2-(8-[3]-ladderane-octanyl)-sn-glycerol	Ptaquiloside	16:1-Glc-Stigmasterol
1-(2-Thienyl)-1-heptanone	1-Acetylcyclohexyl acetate	1-(9,14-dimethyl-pentadecanyl-2-(8-[3]-ladderane-octanyl)-sn-glycerol	20:3-Glc-Campesterol	2-(2-Benzenesulfonamido-5-pyrimidinyloxy)acetic acid	1-(O-alpha-D-glucopyranosyl)-3-keto-(1,25R)-hexacosanediol	Selagine	16-Acetylpriverogenin A
1(3)-glyceryl-6-keto-PGF1α	1beta,2alpha,3beta,19alpha-Tetrahydroxy-12-ursen-28-oic acid 28-O-[b-D-Glucopyranosyl-(1->2)-b-D-glucopyranosyl] ester	1-(O-alpha-D-glucopyranosyl)-(1,3R,25S,27R)-octacosanetetraol	21-Hydroxydydrogesterone glucoronide	2-(8-[3]-ladderane-octanyl)-sn-glycero-3-phosphoethanolamine	1-(O-alpha-D-mannopyranosyl)-29-keto-(1,3R,31R)-dotriacontanetriol	Ser Ile Gln	16alpha,17alpha-Epoxy-20-oxopregn-5-en-3beta-yl acetate
1-(5Z,8Z,11Z,14Z,17Z-Eicosapentaenoyl)-sn-glycero-3-phosphocholine	1-Cyano-2-hydroxy-3-butene	1-(O-alpha-D-glucopyranosyl)-3-keto-(1,27R)-octacosanediol	2-Aminopyrazine	2,2-Bis(4-hydroxyphenyl)hexafluoropropane	1,1'-(OH)2-3,4-Didehydrolycopene	Spermidine	16-hydroxy-18-bromo-8E,17E19Z-tricosatrien-4,6-diynoic acid
1-(6-[5]-ladderane-hexanoyl)-2-(8-[3]-ladderane-octanyl)-sn-glycerophosphocholine	1H-Imidazole-4-carboxamide, 5-[3-(hydroxymethyl)-3-methyl-1-triazenyl]-	1-(O-alpha-D-glucopyranosyl)-3-keto-(1,27R,29R)-triacontanetriol	2-Angeloyl-9-(3-methyl-2E-pentenoyl)-2b,9a-dihydroxy-4Z,10(14)-oplopadien-3-one	2,2-Dimethyl-3,4-bis(4-methoxyphenyl)-2H-1-benzopyran-7-ol acetate	1,1,1-Trichloro-2-(4-hydroxyphenyl)-2-(4-methoxyphenyl)ethane	Thr Glu Thr	17beta-(Acetylthio)estra-1,3,5(10)-trien-3-ol acetate
1-(6-[5]-ladderane-hexanyl)-2-(8-[3]-ladderane-octanyl)-sn-glycerophosphocholine	1-Hydroxy-3-methyl-9H-carbazole	1,1,3,3-tetraphenylurea	2'-Apo-beta-carotenal	2,3,3-Triphenylacrylonitrile	1,1,3,3-tetraphenylurea	Tussilagine	17beta,21beta-epoxy-16alpha-ethoxyhopan-3beta-ol
1-(8-[5]-ladderane-octanoyl)-2-(8-[3]-ladderane-octanyl)-sn-glycerophosphocthanolamine	1-Hydroxychlordene	1,1'-[1,12-Dodecanediylbis(oxy)]bisbenzene	2-Bromomaleylacetate	2,3-dinor Fluprostenol	1,1'-[1,12-Dodecanediylbis(oxy)]bisbenzene	Val Asn Arg	17-Octadecene-5,7,15-triynoic acid, 18-bromo-, (E)-
1-(O-alpha-D-glucopyranosyl)-3-keto-(1,27R)-octacosanediol	1-Isothiocyanato-2-(methylthio)ethane	1,17-Heptadecanediol	2-Diethylaminoethanol	2,3-Diphenyl-3-(2-pyridinyl)acrylonitrile	1,17-Heptadecanediol	Val His Arg	17-oxo-20Z-hexacosenoic acid
1-(O-alpha-D-glucopyranosyl)-3-keto-(1,27R,29R)-triacontanetriol	1-Isothiocyanato-6-(methylthio)hexane	1,1-Diethoxyethane	2-Hydroxyfluorene	2,4,12-Octadecatrienoic acid isobutylamide	1,1-Diethoxyethane	Val Trp Glu	17-tetracosenal
1,1-Diphenyl-2-(4-methoxyphenyl)propene	1-Isothiocyanato-7-(methylsulfinyl)heptane	1,1-Dihexyloxyethane	2-Methyl-4-propyl-1,3-oxathiane	2,4,5-Tribromo-1-(4-chlorobenzoyl)imidazole	1,1-Dihexyloxyethane	Val Tyr Pro	17-trifluoromethylphenyl trinor PGF2α isopropyl ester
1,1'-Ethylidenebistryptophan	1-Isothiocyanato-7-(methylthio)heptane	1,1'-Ethylidenebistryptophan	2-Methylbutyroylcarnitine	2,4',6,6'-Tetranitro-2',4-azoxytoluene	1,2,3,4-Tetrahydro-6-propanoylpyridine	Vinylacetylglycine	17-trifluoromethylphenyl trinor PGF2α methyl ester
1,2,3,4,6,7,8-Heptachlorodibenzodioxin	1-Isothiocyanato-8-(methylthio)octane	1,2,3,4-Tetrahydro-1-phenyl-4-(1-phenylethyl)naphthalene	2-Methylene-5-(2,5-dioxotetrahydrofuran-3-yl)-6-oxo--10,10-dimethylbicyclo[7: 2: 0]undecane	2,5-Dimethyl-4-ethoxy-3(2H)-furanone	1,2,3-Tris(chloromethoxy)propane	Yellow AB	17α-(N-Acetyl-D-glucosaminyl)-estradiol 3-D-glucuronide
1,2,3,4-Tetrachlorodibenzodioxin	1-Methyl-2-cyanopyridinium	1,2,3,4-Tetrahydro-6-propanoylpyridine	2-Oxo-10-methylthiodecanoic acid	20-Dihydrodexamethasone	1,2,4-Nonadecanetriol		18-fluoro-9Z,12Z-octadecadienoic acid
1,2,3,4-tetrahydro-2,5,8-trimethyl naphthalene	1-O-beta-D-Glucopyranosyl-2,3-di-O-(8-hexadecenoyl)glycerol	1,20-Eicosanediol	2-Pentacosanamidoethanesulfonic acid	22:5 Cholesteryl ester	1,2,4-Trigalloyl-beta-D-glucopyranose		18-Fluoro-octadecanoic acid
1,28-Dicaffeoyloctacosanediol	1-O-Caffeoyl-(b-D-glucose 6-O-sulfate)	1,2-Benzoquinone	2-Phenylaminoadenosine	26,26,26,27,27,27-hexafluoro-25-hydroxy-16,17,23,23,24,24-hexadehydrovitamin D3 / 26,26,26,27,27,27-hexafluoro-25-hydroxy-16,17,23,23,24,24-hexadehydrocholecalciferol	1,20-Eicosanediol		19-Methoxypomolic acid 3-arabinoside
1,28-Octacosanediol diferulate	1-Octen-3-ol-3-o-beta-D-xylopyranosyl(1->6)-beta-D-glucopyranoside	1,2-Dihydro-1,1,6-trimethylnaphthalene	2α-(benzyloxy)-1α,25-dihydroxy-19-norvitamin D3 / 2α-(benzyloxy)-1α,25-dihydroxy-19-norcholecalciferol	28:2(5Z,9Z)(6Br)	1,2-Benzoquinone		1-Acetyl-3,27-dihydroxywitha-5,24-dienolide 3-glucoside
1,2-Anthracenediol	1-O-Desmethyltetrabenazine glucuronide	1,2-Distearoyl phosphatidyl serine	3-(2-chloro-10H-phenothiazin-10-yl)propan-1-amine	28:5(10Z,13Z,16Z,19Z,22Z)	1,2-Distearoyl phosphatidyl serine		1alpha,3beta,22R-Trihydroxyergosta-5,24E-dien-26-oic acid 3-O-b-D-glucoside 26-O-b-D-glucosyl ester
1,2-dihydrostilbene	1-Palmitoyl-2-(5-keto-8-oxo-6-octenoyl)-sn-glycero-3-phosphatidylcholine	1,2-tetracosanediol	3-(4-Methyl-3-pentenyl)thiophene	2-Amino-2-Norbornanecarboxylic acid	1,2-tetracosanediol		1alpha,5alpha-Epidithio-17a-oxa-D-homoandrostan-3,17-dione
1,2-Di-O-palmitoyl-3-O-(6-sulfoquinovopyranosyl)glycerol	1-Tritriacontanol	1,3,7-Trimethyluric Acid - 13C4,15N3 (2,4,5,6-13C4, 1,3,9-15N3)	3-(Isothiocyanatomethyl)-1-methoxy-1H-indole	2-Amino-3-hydroxy-5-nitrobenzophenone	1,3,7-Trimethyluric Acid - 13C4,15N3 (2,4,5,6-13C4, 1,3,9-15N3)		1-Ethyl-2-benzimidazolinone
1,2-O-Diacetylzephyranthine	1α,2α,25-trihydroxy-19-norvitamin D3 / 1α,2α,25-trihydroxy-19-norcholecalciferolcholecalciferol	1,3-di-(octadec-9Z-enoyl)-(1-cyano-2-methylene-propane-1,3-diol)	3,3'-Dichloro-4,4'-diaminodiphenyl ether	2-Amino-5-nitrobenzophenone	1,3,8-Trihydroxy-4-methyl-2,7-diprenylxanthone		1-hexadecanyl-2-(8-[3]-ladderane-octanyl)-sn-glycerol
1,7-Dimethylguanosine	1α-hydroxy-23-[3-(1-hydroxy-1-methylethyl)phenyl]-22,22,23,23-tetradehydro-24,25,26,27-tetranorvitamin D3 / 1α-hydroxy-23-[3-(1-hydroxy-1-methylethyl)phenyl]-22,22,23,23-tetradehydro-24,25,26,27-tetranorcholecalciferol	1,7-Dimethylguanosine	3,4,7-Trimethyl-2E,6-octadien-1-ol	2-Aminomethylpyrimidine	1,3-Octadiene		1-Hydroxyvitamin D3 3-D-glucopyranoside
1-[2-(4-Hydroxyphenyl)-1-benzofuran-3-yl]ethanone	2-(3-Phenylpropyl)tetrahydrofuran	1-[2-(4-Hydroxyphenyl)-1-benzofuran-3-yl]ethanone	3,4-Dehydrochlorambucil	2-Chloro-1,3-dimethoxy-5-methylbenzene	1,5-Dibutyl methyl hydroxycitrate		1-NBD-decanoyl-2-decanoyl-sn-Glycerol
10-Deoxygeniposidic acid	2-(4-Methyl-5-thiazolyl)ethyl hexanoate	10-deacetylbaccatin III	3,4-Dihydro-7-methoxy-2-methylene-3-oxo-2H-1,4-benzoxazine-5-carboxylic acid	2-Chloro-1-propanol	10-deacetylbaccatin III		1-O-(3R,4-dihydroxy-2-methylene-butanoyl)-beta-D-glucopyranose
10-Deoxymethymycin	2,2'-Bisphenol F	10-Deoxygeniposidic acid	3,4-Dihydrospirilloxanthin	2-Hydroxy-6-oxo-6-(2-hydroxyphenyl)-hexa-2,4-dienoate	10-methyl-1-dodecanol		1-Octacosene
10-Hydroxycamtothecin	2,2-Dimethyl-3-(4-methoxyphenyl)-4-ethyl-6-(1-pyrrolidinylmethyl)-2H-1-benzopyran-7-ol	10-Deoxymethymycin	33-Deoxy-33-hydroperoxyfurohyperforin	2-Hydroxypentyl glucosinolate	11,12,15-trihydroxy palmitic acid		1-Octadecyl Lysophosphatidic Acid
10-nitro-9E-octadecenoic acid	2,2-Dimethyl-3,4-bis(4-methoxyphenyl)-2H-1-benzopyran-7-ol acetate	10-Hydroxycamtothecin	3-Deacetyl Khivorin	2-Isopropyl-1,4-hexadiene	11,13-Dihydrotaraxinic acid glucosyl ester		1-Phenyl-2,4-pentadiyn-1-one
11-alpha-O-beta-D-Glucopyranosyl-16alpha-O-methylneoquassin	2,3,4-Trihydroxybenzylhydrazide	10-methyl-1-dodecanol	3-decaprenyl-4,5-dihydroxybenzoic acid	2-Isopropyl-3,5-dimethoxy-6-methylpyrazine	11,13-dimethoxy-12-hydroxy-9-octadecenoic acid		1-Phenylbiguanide
11-Chloro-8E,10E-undecadien-1-ol	2,3,5-Trichloro-cis,cis-muconate	10-nitro-9E-octadecenoic acid	3-Hydroxy-10'-apo-b,y-carotenal	2-Methylpyridine	11beta,17beta-Dihydroxy-9alpha-fluoro-17alpha-methyl-5beta-androstan-3-one		1-tetradecanyl-2-(8-[3]-ladderane-octanyl)-sn-glycerol
11-dehydro Thromboxane B2-d4	2,3-Diacetoxy-7,8-Epoxy-24,29-Dinor-1,3,5-Friedelatriene-20-Carboxylic Acid	11,12,15-trihydroxy palmitic acid	3-hydroxymyristoyl-CoA	2-N-Dodecyltetrahydrothiophene	11-beta-hydroxyandrosterone-3-glucuronide		1α,25-dihydroxy-11β-(2-hydroxyethyl)vitamin D3 / 1α,25-dihydroxy-11β-(2-hydroxyethyl)cholecalciferol
11-Deoxocucurbitacin I	2,3-Diethylpyrazine	11,13-Dihydrotaraxinic acid glucosyl ester	3-hydroxypalmitoyl-CoA	2-O-(beta-D-galactopyranosyl-(1->6)-beta-D-galactopyranosyl) 2S,3R-dihydroxynonanoic acid	11beta-PGF2alpha-EA		1α,25-dihydroxy-26,26,26,27,27,27-hexafluoro-16,17,23,23,24,24-hexadehydro-19-norvitamin D3 / 1α,25-dihydroxy-26,26,26,27,27,27-hexafluoro-16,17,23,23,24,24-hexadehydro-19-norcholecalciferol
11-Hydroxyprogesterone 11-glucuronide	2,3-Dihydro-5-(5-methyl-2-furanyl)-1H-pyrrolizine	11,13-dimethoxy-12-hydroxy-9-octadecenoic acid	3-Indolebutyric acid	2-Octaprenyl-6-hydroxyphenol	12alpha-Hydroxyamoorstatin		1α-hydroxy-22-(3-methylphenyl)-23,24,25,26,27-pentanorvitamin D3 / 1α-hydroxy-22-(3-methylphenyl)-23,24,25,26,27-pentanorcholecalciferol
11-O-Demethyl-17-O-deacetylvindoline	2,4,14-Eicosatrienoic acid isobutylamide	11-alpha-O-beta-D-Glucopyranosyl-16alpha-O-methylneoquassin	3-Methyl-3H-imidazo[4,5-f]quinoxalin-2-amine	2-Octaprenyl-6-methoxyphenol	12-HETE-T		2- (2,6-Dimethoxyphenoxyethyl)Aminomethyl-1,4-Benzodioxane (WB 4101)
12-Hydroxyergometrine	2,4-Dichloroaniline	11beta,17beta-Dihydroxy-9alpha-fluoro-17alpha-methyl-5beta-androstan-3-one	3-O-(Rhaa1-3Glcb1-2Glcb1-4Galb)-(25R)-12-oxo-5alpha-spirostan-3beta-ol	2-Thiopheneacetic acid, 5-(hydroxyphenylmethyl)-α-methyl-	12-Hydroxyergometrine glucoronide		2-(3-Methylbutyl)-1H-pyrrolo[2,3-b]pyridine
12R-acetoxy-7Z-punaglandin 4	2,4-Dichlorophenoxyacetic Acid, Methyl Ester	11-beta-hydroxyandrosterone-3-glucuronide	3'-O-Aminopropyl-25-hydroxyvitamin D3	3-(4-Chloro-benzyl)-5-(2-methoxy-phenyl)-[1,2,4]oxadiazole	12-O-Palmitoyl-16-hydroxyphorbol 13-acetate		2-(4-Methyl-5-thiazolyl)ethyl decanoate
12S-acetoxy-punaglandin 1	2,4-Undecadiene-8,10-diynoic acid 2,3-dehydropiperidide	11-dehydro Thromboxane B2-d4	3-Oxo-OPC8-CoA	3',4'-Methylenedioxy-alpha-pyrrolidinopropiophenone	12-Tricosanol		2-(9R-(15Z-docosenoyloxy)-3-methyl-2Z-decenoyloxy)-ethanesulfonic acid
13(S)-HODE-biotin	2-[4,6-Bis(2,4-dimethylphenyl)-1,3,5-triazin-2-yl]-5-(octyloxy)phenol	11-Deoxocucurbitacin I	4-(2-Hydroxy-3-isopropylaminoproxy)-benzyloxy acetic acid	3,5,3',5'-Tetra-tert-butyldiphenoquinone	13(1)-Oxo-magnesium-protoporphyrin IX 13-monomethyl ester		2,12,14,16,17-pentachlorotetracosane-1,15-disulfate
13,14-dihydro-15(R,S)-hydroxy-16,16-difluoro Prostaglandin E1-d4	21-Hydroxypregn-4-ene-3,20-dione hydrogen succinate	11-Deoxytetrodotoxin	4,7,10,13,16-Docosapentaynoic acid	3,5-Dichloro-2-methylmuconate	13(S),14(S)-epoxy Fluprostenol isopropyl ester		2,2'-Bipyridylamine
13-beta-D-Glucosyloxydocosanoate	22:1 Campesteryl ester	11-Hydroxyprogesterone 11-glucuronide	4-[(2-Hydroxy-1-naphthalenyl)azo]benzenesulfonic acid	3,5-Dinitrocatechol (Or-486)	13,14-dihydro-16,16-difluoro PGJ2		2,3,3-Triphenylacrylonitrile
13-Methyl-1-tritriacontene	23-methyl-5Z,9Z-tetracosadienoic acid	12alpha-Bromo-11beta-hydroxypregn-4-ene-3,20-dione	4-[(5-amino-1-methyl-1H-indol-3-yl)methyl]-3-methoxy-N-[(2-methylphenyl)sulfonyl]-Benzamide	3,7,11,15,18,22,26,30-octamethyldotriacontane-1,32-diol	13-Deoxytedanolide		2,3-Bis-O-(geranylgeranyl)glycerol 1-phosphate
13-sophorosyloxydocosanoic acid	24-methylene-cholesterol sulfate	12-HETE-T	4-Amino-2-hydroxylamino-6-nitrotoluene	3,7,11,15,19-Pentamethyleicosa-2E,6E,10E,14E,18-pentaen-1-ol	14-chlorotetracosane-1,15-disulfate		2,3-di-0-hexanoyl-alpha-glucopyranose
14,15-LTD4	26-(2-Glucosyl-6-acetylglucosyl]-1,3,11,22-tetrahydroxyergosta-5,24-dien-26-oate	12-Hydroxyergometrine	4'-Chloro-2-hydroxyaurone	3-10-Luteinizing hormone-releasing factor	14-fluoro-myristic acid		2,3-Dinor-6-keto-PGF1a
14-Hydroxy-6-O-methylerythromycin A	27-Nor-5b-cholestane-3a,7a,12a,24,25-pentol	12-Hydroxyergometrine glucoronide	4-Chloronitrobenzene	35-aminobacteriohopane-32,33,34-triol	14-methyl-1-pentadecanol		2,3-Diphenyl-3-(2-pyridinyl)acrylonitrile
14Z-Tricosene-10-one	28:2(5Z,9Z)(22Me)	12-O-Palmitoyl-16-hydroxyphorbol 13-acetate	4-Ethyl-5-propylthiazole	35S-Methylokadaic acid 7-hexadecanoate	15(R),19(R)-hydroxy PGF2α		2,3-Secoporrigenin
15-methoxy-tricosanoic acid	28-hydroxy-octacosanoic acid	12R-acetoxy-7Z-punaglandin 4	4-Guanidinobutanamide	3a,7b,12a-Trihydroxyoxocholanyl-Glycine	15(R)-17-phenyl trinor PGF2α isopropyl ester		2,4-Dinitrophenol
15-methyl-1,2-heneicosanediol	2-Amino-2-Norbornanecarboxylic acid	12S-acetoxy-punaglandin 1	4-Hydroxy-3-nitrosobenzamide	3alpha-Acetomethoxy-11alpha-oxo-12-ursen-24-oic acid	15-deoxy-Δ12,14-Prostaglandin J2-biotin		2,4-Dodecadienoic acid pyrrolidide
16:1-Glc-Stigmasterol	2-Amino-3-hydroxy-5-nitrobenzophenone	12-Tricosanol	4-Hydroxy-4-(3-pyridyl)-butanoic acid	3-bromohexadecanoic acid	15-methyl-1,2-eicosanediol		2,5-Dimethyl-4-ethoxy-3(2H)-furanone
16:3 Cholesteryl ester	2-Amino-4-nitrotoluene	13(1)-Oxo-magnesium-protoporphyrin IX 13-monomethyl ester	4-Hydroxy-9-fluorenone	3-Decaprenyl-4-hydroxybenzoic acid	16(R)-AFP 07 (free acid)		2,7-Anhydro-alpha-N-acetylneuraminic acid
16alpha,17alpha-Epoxy-20-oxopregn-5-en-3beta-yl acetate	2-Amino-5-nitrobenzophenone	13-(2-Methylcrotonoyl)oxylupanine	4-Hydroxyglucobrassicin	3-Deoxy-D-manno-octulosonyl-lipid IV(A)	16:0-Glc-Campesterol		2,9-Dimethyl-2,9-diazatricyclo[10.2.2.25,8]octadeca-5,7,12,14,15,17-hexaene-3,10-diol, 9CI
17beta-[Bis(2-hydroxyethyl)amino]androst-5-en-3beta-ol	2-Decaprenyl-3-methyl-6-methoxy-1,4-benzoquinone	14-methyl-1-pentadecanol	4-Hydroxy-N-desmethyltamoxifen	3-Epipapyriferic acid	16-Epivellosimine		20:0-Glc-Sitosterol
17beta-Hydroxy-4,17-dimethyl-4-azaandrost-5-en-3-one	2'-Deoxycytidine diphosphate (dCDP)	15(R),19(R)-hydroxy PGF2α	4'-Hydroxytamoxifen	3-Hydroxy-7-aminonitrazepam	16-iodo-hexadecanoic acid		20:3-Glc-Campesterol
17beta-Hydroxy-5alpha-androst-1-en-3-one propionate	2-deoxyecdysone 22-phosphate	15(R)-17-phenyl trinor PGF2α isopropyl ester	4-Methylhexan-3-one	3-Hydroxy-carbofuran	16-phenoxy tetranor PGF2α cyclopropyl methyl amide		20-Dihydrodexamethasone
17-Ethynyl-5alpha-androstan-17beta-ol	2H-1-Benzopyran-2-one, 6-(1,2-dihydroxyethyl)-7-hydroxy-8-methoxy- glucuronide	15-methoxy-tricosanoic acid	4-Pentyn-1-ol	3'-Keto-3'-deoxy-ATP	17,18-dehydro-clavulone I		20-oxo-heneicosanoic acid
17-hydroxyandrostane-3-glucuronide	2-Hydroxy-6-oxo-6-(2-hydroxyphenyl)-hexa-2,4-dienoate	15-methyl-1,2-eicosanediol	4-Quinolone-3-Carboxamide CB2 Ligand	3-Mercaptohexyl hexanoate	17beta-Hydroxy-2alpha-(methoxymethyl)-17-methyl-5alpha-androstan-3-one		22:1-Glc-Stigmasterol
17-Hydroxypancuronium	2-Hydroxybenzaldehyde O-[xylosyl-(1->6)-glucoside]	15-methyl-1,2-heneicosanediol	5-(alpha-Phenylethyl)semioxamazide	3-Methylcyclohexanethiol	17-phenyl trinor Prostaglandin F2α ethyl amide-d4		22-Acetylpriverogenin B
17-Ketostypolhydroperoxide	2-Hydroxyfluorene	16:3 Cholesteryl ester	5-(Difluoromethoxy)-2-[[(3,4-dimethoxy-2-pyridinyl)methyl]thio]-1H-benzimidazole	3-Methyl-L-histidine	17β-Estradiol 3-(β-D-glucuronide)		22-epi-Hippurin-1
17-oxo-20Z-hexacosenoic acid	2-Methyl-4-propyl-1,3-oxathiane	16-iodo-hexadecanoic acid	5,8-Epoxy-5,8-dihydro-3-hydroxy-8'-apo-b,y-carotenal	3-O-(2-O-(2E-decenoyl)-alpha-L-rhamnopyranosyl)-3-hydroxydecanoic acid	18-fluoro-9E-octadecenoic acid		22R-hydroxycholesterol(d7)
17-phenyl trinor PGF2α cyclohexyl amide	2-O-(beta-D-galactopyranosyl-(1->6)-beta-D-galactopyranosyl) 2S-hydroxyundecanoic acid	17beta-[Bis(2-hydroxyethyl)amino]androst-5-en-3beta-ol	5'-Deoxy-5'-fluoroadenosine	3-O-Caffeoyl-1-O-methylquinic acid	19-(3-methyl-butanoyloxy)-villanovane-13alpha,17-diol		23,23-difluoro-1α,25-dihydroxyvitamin D3 / 23,23-difluoro-1α,25-dihydroxycholecalciferol
17-trifluoromethylphenyl trinor PGF2α	2-Phenylaminoadenosine	17beta-Hydroxy-4,17-dimethyl-4-azaandrost-5-en-3-one	5-Hydroxy-3',4'-methylenedioxy-6'',6''-dimethylpyrano[2'',3'':7,8]isoflavone	3α-Hydroxy-15-oxo-5β-chol-8-en-24-oic Acid	19-epi-Cathenamine		24,24-Difluoro-1,25,26-trihydroxyvitamin D3
17α-(N-Acetyl-D-glucosaminyl)-estradiol 3-D-glucuronide	2-Pyrrolidinone, 4-(2-aminoethyl)-1-ethyl-3,3-diphenyl- (AHR 5904)	17beta-Hydroxy-5alpha-androst-1-en-3-one propionate	5-Hydroxy-7-methoxy-2-tritriacontyl-4H-1-benzopyran-4-one	4,4'-Diaponeurosporen-4-al	19-norcholestanol		24-ethyl-5alpha-cholest-25-en-3alpha,12alpha,16alpha-triol
18-fluoro-9Z,12Z-octadecadienoic acid	3-((3-Cholamidopropyl)dimethylammonium)-1-propanesulfonate	17-hydroxyandrostane-3-glucuronide	5-Hydroxymethylcimetidine	4,5-didemethylsimmondsin	1'-Acetoxyeugenol acetate		24-Nor-5β-chol-22-ene-3α,7α,12α-triol
18-Fluoro-octadecanoic acid	3-(m-Aminophenyl)-2-(p-methoxyphenyl)acrylonitrile	17-Hydroxypancuronium	5-L-Glutamyl-L-alanine	4-Amino-3- (5-Chlorothien-2-Yl)Butanoic Acid	1-Acetyl-3,14,20-trihydroxywitha-5,24-dienolide 3-glucoside		25-fluoro-1α-hydroxyvitamin D3 / 25-fluoro-1α-hydroxycholecalciferol
1-Arachidonoyl Glycerol-d5	3-(N-Maleimidopropionyl)-biocytin	17-oxo-20Z-hexacosenoic acid	5-O-β-D-Mycaminosyltylactone	4'-Apo-beta,psi-caroten-4'-al	1beta,2alpha,3beta,19alpha-Tetrahydroxy-12-ursen-28-oic acid 28-O-[b-D-Glucopyranosyl-(1->2)-b-D-glucopyranosyl] ester		25-hydroxy-1α-hydroxymethyl-16,17-didehydrovitamin D3 / 25-hydroxy-1α-hydroxymethyl-16,17-didehydrocholecalciferol
1-Benzyloxycarbonylaminophenethyl Chloromethyl Ketone	3,3',4,4'-Tetrachloroazobenzene	17-phenyl trinor PGF2α amide	5Z,9Z,19Z-hexacosatrienoic acid	4-Chloroacetanilide	1-Dodecene		26,27-diethyl-1α,25-dihydroxy-22-thia-20-epivitamin D3 / 26,27-diethyl-1α,25-dihydroxy-22-thia-20-epicholecalciferol
1-Cyclohexyl-11-heneicosanone	3,3-Dibromo-2-n-butylacrylic acid	17-phenyl trinor PGF2α cyclohexyl amide	6,6'-Dibromoindigotin	4-Cyanoindole	1H-Imidazole-1-acetic acid		2-Acetylpyrazine
1-Dehydro-9-fluoro-11-oxotestololactone	3,3'-diindolylmethane	17-trifluoromethylphenyl trinor PGF2α	6-[5]-ladderane-1-hexanol	4'-Desmethylpapaverine glucuronide	1-Hydroxy-2-acetamidofluorene		2-AI
1-Deoxy-D-glucitol	3,3-diiodoacrylic acid	17-trifluoromethylphenyl-13,14-dihydro trinor Prostaglandin F1α	6-Bromo-5E,9Z,13Z,24Z-heptacosatetraenoic acid	4-Glutathionyl cyclophosphamide	1-Hydroxy-2-aminoethylphosphonate		2alpha,3alpha-(Difluoromethylene)-5alpha-androstan-17beta-ol acetate
1-eicosanoyl-2-docosanoyl-sn-glycero-3-phosphosulfocholine	3,3'-Dimethylbenzidine	17β-Estradiol 3-(β-D-glucuronide)	8,9-Difluoro-8E,10E-dodecadien-1-ol	4-Guanidinobutanoic acid	1-Isothiocyanato-2-(methylthio)ethane		2alpha-Fluoro-17beta-hydroxyandrost-4-en-3-one
1-hexadecanyl-2-(8-[3]-ladderane-octanyl)-sn-glycerol	3,5-Dinitro-L-tyrosine	19-epi-Cathenamine	8-Hydroxyapigenin 8-(2'',4''-disulfatoglucuronide)	4-hydroxy Nonenal Glutathione	1-Isothiocyanato-6-(methylthio)hexane		2-Aminoethylphosphocholate
1-Hexanethiol	3,7,11,15,18,22,26,30-octamethyldotriacontane-1,32-diol	19-Hydroxycinnzeylanol 19-glucoside	8β-Hydroxycarapin, 3,8-Hemiacetal	4-Hydroxy-2',3,3',5',6'-pentachlorobiphenyl	1-Isothiocyanato-7-(methylsulfinyl)heptane		2'-Apo-beta-carotenal
1'-Hydroxyzafirlukast	3-[(2-Methyl-3-furanyl)thio]-4-heptanone	1-Aminocyclohexanecarboxylic acid	AAPH	4'-Hydroxyanigorootin	1-Isothiocyanato-8-(methylthio)octane		2-Hexaprenyl-6-methoxy-1,4-benzoquinol
1-Methylguanosine	3a,7b,12a-Trihydroxyoxocholanyl-Glycine	1-Cyclohexyl-11-heneicosanone	Abu-Asp-OH	4-Hydroxyvalsartan	1-Methyl-4-nitro-5-(S-Gluctathionyl) Imidazole		2-Isopropyl-3,5-dimethoxy-6-methylpyrazine
1-Nitro-5-glutathionyl-6-hydroxy-5,6-dihydronaphthalene	3alpha-Acetomethoxy-11alpha-oxo-12-ursen-24-oic acid	1-eicosanoyl-2-docosanoyl-sn-glycero-3-phosphosulfocholine	Acarbose (component 1)	5'-((Z)-Feruloyl) 3-(2'-methylarabinosylxylose)	1-Methyl-4-phenyl-1,2,3,6-tetrahydropyridine N-oxide		2-Isopropyl-5-methylfuran
1-O-(4-hydroxy-2-methylene-butanoyl)-beta-D-glucopyranose	3-Chloro-4-hydrazinophenylmethylsulfonylmethyl sulfone	1-hexadecanyl-2-(8-[3]-ladderane-octanyl)-sn-glycerol	Acetochlor	5-(3-Methyltriazen-1-yl)imidazole-4-carboxamide	1-methyl-N-(9-methyl-9-azabicyclo[3.3.1]non-3-yl)-7-(sulfooxy)-, endo- glucuronide		2-methyl-4-phenyl Thiazole
1-O-[2-(Acetylamino)-2-deoxy-alpha-D-glucopyranosyl]-D-myo-Inositol	3'-Deaminofusarochromanone	1H-Imidazole-1-acetic acid	Acetyl phosphate	5,6-Dihydro-11-methoxyyangonin	1-Naphthylacetylspermine		2-N-Dodecyltetrahydrothiophene
1-Oleoyl-2-acetyl-sn-glycerol	3-Deazaneplanocin A	1-Hydroxy-2-aminoethylphosphonate	Acetylhydrazinopthalazinone	5,9-Heptacosadiene	1-Nonadecanol		2-O-(beta-D-galactopyranosyl-(1->6)-beta-D-galactopyranosyl) 2S,3R-dihydroxytridecanoic acid
1-Palmitoyl-2-(5-hydroxy-8-oxo-6-octenoyl)-sn-glycero-3-phosphatidylcholine	3-Epipapyriferic acid	1'-Hydroxyzafirlukast	Actinorhodin	5alpha-Cholestane	1-O-(8R-hydroxy-8-methyl-3Z,9-decadienoyl)-beta-D-glucopyranose		2-Octaprenyl-3-methyl-5-hydroxy-6-methoxy-1,4-benzoquinone
1-Palmitoyllysophosphatidylcholine	3-Fluoromethcathinone	1-Methyl-4-nitro-5-(S-Gluctathionyl) Imidazole	AG-041R	5-Amino-2-p-toluidinobenzenesulfonic acid	1-O-beta-D-Glucopyranosyl-2,3-di-O-(8-hexadecenoyl)glycerol		2-Octaprenyl-3-methyl-6-methoxy-1,4-benzoquinone
1-Phenyl-3-(phenylsulfonyl)-2-propen-1-one	3-Hydroxy-2-(4-morpholinylmethyl)estra-1,3,5(10)-trien-17-one	1-Methyl-4-phenyl-1,2,3,6-tetrahydropyridine N-oxide	Ala Glu Thr	5H-Benzo[5,6]cyclohepta[1,2-b]pyridin-6-ol, 8-chloro-6,11-dihydro-11-(4-piperidinylidene)-	1-Octadecanol		2-Octaprenyl-6-methoxyphenol
1-Propene, 1,1,3,3-tetrafluoro-2-(fluoromethoxy)-3-methoxy-	3-Hydroxy-carbofuran	1-Methylguanosine	Ala Lys Trp	5-Hydroxy-7,4'-dimethoxy-6,8-di-C-prenylflavanone 5-O-galactoside	1-Octen-3-ol-3-o-beta-D-xylopyranosyl(1->6)-beta-D-glucopyranoside		2-Oxoticlopidine
1-Stearoyl-2-Arachidonoyl PC-d8	3''-HydroxyPravastatin	1-Nitro-5-glutathionyl-6-hydroxy-5,6-dihydronaphthalene	Aliarin	5Z,27Z-Tritriacontadiene	1-Palmitoyl-2-(5-hydroxy-8-oxo-6-octenedioyl)-sn-glycero-3-phosphatidylcholine		2-Thiopheneacetic acid, 5-(hydroxyphenylmethyl)-α-methyl-
1-Stearoyl-2-Arachidonoyl-sn-Glycerol-d8	3-methoxy Limaprost	1-Nonadecanol	All trans decaprenyl diphosphate	5α-Cholestan-3β-Ol-6-One	1-Pyrrolidinepropanol, a-(4-hydroxycyclohexyl)-a-phenyl-, cis-		2-Undecyl-4(1H)-quinolinone
1α,25-dihydroxy-11-(4-hydroxymethylphenyl)-9,11-didehydrovitamin D3 / 1α,25-dihydroxy-11-(4-hydroxymethylphenyl)-9,11-didehydrocholecalciferol	3-methyl sulfolene	1-O-(4-hydroxy-2-methylene-butanoyl)-beta-D-glucopyranose	Alliofuroside A	5β-Chol-2-en-24-oic Acid	1-tetradecanol		3,4,7-Trimethyl-2E,6-octadien-1-ol
1α,25-dihydroxy-22-oxavitamin D3 3-hemiglutarate/ 1α,25-dihydroxy-22-oxacholecalciferol 3-hemiglutarate	3-Methyl-3H-imidazo[4,5-f]quinoxalin-2-amine	1-O-[2-(Acetylamino)-2-deoxy-alpha-D-glucopyranosyl]-D-myo-Inositol	Alosetron	6-(((4aR,8aS)-octahydroquinolin-1(2H)-yl)sulfonyl)-1,2,3,4-tetrahydroquinoline	1-tetradecanoyl-2-(8-[3]-ladderane-octanyl)-sn-glycero-3-phospho-(1'-sn-glycerol)		3,4-Dehydrochlorambucil
1α,25-dihydroxy-24a-homo-26,27-dimethyl-22-thiavitamin D3 / 1α,25-dihydroxy-24a-homo-26,27-dimethyl-22-thiacholecalciferol	3'-N-Acetyl-4'-O-(14-methylheptadecanoyl)fusarochromanone	1-Octadecanol	alpha-D-Mannoheptulopyranose	6-(2-Hydroxyethyl)-5,6-dihydrosanguinarine	1-Tritriacontanol		3,4-Dihydrospirilloxanthin
1α,25-dihydroxy-25,25-diphenyl-26,27-dinorvitamin D3 / 1α,25-dihydroxy-25,25-diphenyl-26,27-dinorcholecalciferol	3-O-(2-O-(2E-decenoyl)-alpha-L-rhamnopyranosyl)-3-hydroxydecanoic acid	1-Palmitoyl-2-(5-hydroxy-8-oxo-6-octenoyl)-sn-glycero-3-phosphatidylcholine	AM2201	6-(Isopropylthio)purine	1α-fluoro-25-hydroxy-16,17,23,23,24,24-hexadehydrovitamin D3 / 1α-fluoro-25-hydroxy-16,17,23,23,24,24-hexadehydrocholecalciferol		3,5-Dibromo-4-hydroxybenzamide
1α,25-dihydroxy-26,27-dimethyl-22-thiavitamin D3 / 1α,25-dihydroxy-26,27-dimethyl-22-thiacholecalciferol	3-O-cis-Coumaroylmaslinic acid	1-Propene, 1,1,3,3-tetrafluoro-2-(fluoromethoxy)-3-methoxy-	Amlexanox	6,7-Epoxy-3Z,9Z-tricosadiene	1α-hydroxy-23-[3-(1-hydroxy-1-methylethyl)phenyl]-22,22,23,23-tetradehydro-24,25,26,27-tetranorvitamin D3 / 1α-hydroxy-23-[3-(1-hydroxy-1-methylethyl)phenyl]-22,22,23,23-tetradehydro-24,25,26,27-tetranorcholecalciferol		3,5-Pyridinedicarboxylic acid, 4-(2,1,3-benzoxadiazol-4-yl)-2,6-dimethyl-, mono(1-methylethyl) ester
1α,25-Dihydroxyvitamin D3 25-trimethylsilyl ether	3-O-Mycarosylerythronolide B	1-Pyrrolidinepropanol, a-(4-hydroxycyclohexyl)-a-phenyl-, cis-	Amrinone	6alpha-Hydroxy-5beta-cholan-24-oic Acid	2-(4-Methyl-5-thiazolyl)ethyl hexanoate		3,6,9-Heptacosatriene
2-([4-(2-Chlorophenyl)-3-ethoxycarbonyl-6-methyl-2-picolinyl]methoxyacetic acid	3-Oxopregn-4-ene-20beta-carboxaldehyde dioxime	1-Stearoyl-2-Arachidonoyl PC-d8	Anastrozole	6-bromo-eicosa-5E,9Z-dienoic acid	2-(hydroxymethyl)-Pyrimidine		3,7-Dihydroxy-25-methoxycucurbita-5,23-dien-19-al
2-(2-Thienylmethylene)-1,6-dioxaspiro[4.4]non-3-ene	3-Oxotetradecanoyl-CoA	1-Stearoyl-2-Arachidonoyl-sn-Glycerol-d8	Araliasaponin I	6-Gingesulfonic acid	2(α-D-Mannosyl)-D-glycerate		3,7-Dimethyl-3-octene-1,2,6,7-tetrol
2-(3-Methylbutyl)-1H-pyrrolo[2,3-b]pyridine	3-trans-Caffeoyltormentic acid	1-tetradecanol	Archangelolide	6-Hydroxyluteolin 6,7-disulfate	2,2',3,3',4',5,6'-Heptabromodiphenyl ether		33-Deoxy-33-hydroperoxyfurohyperforin
2-(4'-Chlorophenyl)-3,3-dichloropropenoate	4'-(Dimethylamino)azoxybenzene n-oxide	1-tetradecanoyl-2-(8-[3]-ladderane-octanyl)-sn-glycero-3-phospho-(1'-sn-glycerol)	Arg Gln His	6-Hydroxymelatonin	2,2,4,4-Tetramethyl-6-(1-oxobutyl)-1,3,5-cyclohexanetrione		3alpha,7alpha,12alpha-Trihydroxy-5beta-23E-cholestan-26-oic acid
2-(4-Methyl-5-thiazolyl)ethyl decanoate	4-(o-Carboxybenzamido)glutaramic acid	1α,25-dihydroxy-11-(4-hydroxymethylphenyl)-9,11-didehydrovitamin D3 / 1α,25-dihydroxy-11-(4-hydroxymethylphenyl)-9,11-didehydrocholecalciferol	Arg Lys Val	6-Sinapoylglucoraphenin	2,2'-Bisphenol F		3-Amino-4,7-dihydroxycoumarin
2-(4-Methyl-5-thiazolyl)ethyl octanoate	4,4'-(Diphenylethenylidene)bis[N,N-dimethylbenzenamine]	1α,25-dihydroxy-24a-homo-26,27-dimethyl-22-thiavitamin D3 / 1α,25-dihydroxy-24a-homo-26,27-dimethyl-22-thiacholecalciferol	Arg Met Phe	6-Thioxanthine	2,2-Dimethyl-3-(4-methoxyphenyl)-4-propyl-2H-1-benzopyran-7-ol acetate		3beta-Hydroxy-16-phosphonopregn-5-en-20-one monoethyl ester
2-(acetylamino)-1,5-anhydro-2-deoxy-3-O-b-D-galactopyranosyl-D-arabino-Hex-1-enitol	4,4'-Diaminodiphenyl ether	1α,25-dihydroxy-25,25-diphenyl-26,27-dinorvitamin D3 / 1α,25-dihydroxy-25,25-diphenyl-26,27-dinorcholecalciferol	Argenteane	6α-Hydroxy-castasterone	2,3,4-Trihydroxybenzylhydrazide		3beta-Hydroxy-5alpha-pregnan-20-one acetate
2-(Formamido)-N1-(5-phospho-D-ribosyl)acetamidine	4,4'-Dichlorobenzophenone	1α,25-Dihydroxyvitamin D3 25-trimethylsilyl ether	Argininic acid	6α-hydroxycholestanol(d7)	2,3,5-Trichloro-cis,cis-muconate		3-Geranyl-4,2',4',6'-tetrahydroxy-5-prenyldihydrochalcone
2-(Methylthio)phenol	4,4'-Methylene bis(2-methylaniline)	2-([4-(2-Chlorophenyl)-3-ethoxycarbonyl-6-methyl-2-picolinyl]methoxyacetic acid	Argyrolobine	7-(4-Hydroxyphenyl)-1-phenyl-4-hepten-3-one	2,3,7,8-Tetrachlorodibenzofuran		3-hydroxypalmitoyl-CoA
2-(Methylthiomethyl)-3-phenyl-2-propenal	4,7,10,13,16-Docosapentaynoic acid	2-(2-Thienylmethylene)-1,6-dioxaspiro[4.4]non-3-ene	Armillarivin	7,3'-Dihydroxy-4'-methoxyflavan	2,3-DCPE		3-Methylcyclohexanethiol
2-(N-morpholino)ethanesulfonic acid	4a-Peroxy-tetrahydrobiopterin	2-(4'-Chlorophenyl)-3,3-dichloropropenoate	Artonin Q	7,8-dichloro-hexadecanoic acid	2,3-Diacetoxy-7,8-Epoxy-24,29-Dinor-1,3,5-Friedelatriene-20-Carboxylic Acid		3-Nonaprenyl-4-hydroxybenzoic acid
2-(S-Glutathionyl)acetyl chloride	4-Chloromethandienone	2-(4-Methyl-5-thiazolyl)ethyl octanoate	Asn Asp Gly	7-Hydroxy-6-methyl-8-ribityl lumazine	2,3-Diethylpyrazine		3-O-beta-D-Galactopyranosylcinnamtannin B1
2,2',3-Trihydroxybiphenyl	4-Deoxyannoreticuin	2-(Formamido)-N1-(5-phospho-D-ribosyl)acetamidine	Asn Ser Tyr	7-Methylinosine	2,3-Dihydro-5-(5-methyl-2-furanyl)-1H-pyrrolizine		3α-androstanediol glucuronide
2,2',4,4',5,5'-Hexabromodiphenyl ether	4E-Undecene-6,8,10-triynoic acid	2-(Methylthio)phenol	Asp Arg Ser	8'-apo-beta-carotenol	2,3-Dihydro-6-methyl-5-(5-methyl-2-furanyl)-1H-pyrrolizine		4,5'-Dimethylangelicin
2,2',4,5'-Tetrabromodiphenyl ether	4-Hydroxy-4-(3-pyridyl)-butanoic acid	2-(Methylthiomethyl)-3-phenyl-2-propenal	Asp Glu Lys	8α-estra-1,3,5(10)-trien-3,17β-diol	2,4,14-Eicosatrienoic acid isobutylamide		4,5-diphenyl-1,2,3-Thiadiazole
2,2,4-Trimethyl-3-(4-fluorophenyl)-2H-1-benzopyran-7-ol acetate	4-Hydroxybenzenesulfonic acid	2-(N-morpholino)ethanesulfonic acid	Asp Ser	9-chloro-10-hydroxy-hexadecanoic acid	2',4',4-Trihydroxy-3'-prenylchalcone 4'-O-glucoside		4-Acetyl-2-prenylphenol glucoside
2,2'-Bipyridylamine	4-Hydroxybenzyl isothiocyanate	2(α-D-Mannosyl)-D-glycerate	Asp-Ser-OH	9-Fluoro-11beta,16alpha-dihydroxypregn-4-ene-3,20-dione	2,4.6-Trichloroanisole		4-Aminoethylbenzenesulfonyl Fluoride
2',2'-Dimethyl(pyrano-5',6':3:4)-1,5-dihydroxy-6-methoxy-10-methylacridone	4-Hydroxylevamisole	2,2',3-Trihydroxybiphenyl	Athidathion	9-Hydroxytridecyl docosanoate	2,4-diamino-butyric acid		4-Chloro-alpha-[4-[2-(diethylamino)ethoxy]phenyl]-alpha-phenylbenzeneethanol
2,3,3',4,5-Pentachlorobiphenyl	4'-O-Demethylrebeccamycin	2,2',4,4',5,5'-Hexabromodiphenyl ether	Avermectin B1a	A 80987	2,4-Dibromophenol		4-Demethylsimmondsin 2'-(E)-ferulate
2,3,4,7,8-Pentachlorodibenzofuran	5-(2'-Carboxyethyl)-4,6-Dihydroxypicolinate	2,2',4,5'-Tetrabromodiphenyl ether	BAY-41-8543	a-[1-(diethylamino)ethyl]-p-hydroxy-Benzyl alcohol	2,4-Dichloroaniline		4-Glutathionyl cyclophosphamide
2,3,5,6-Tetrachloro-4,4'-biphenyldiol	5-(3,4-Dihydroxy-1,5-cyclohexadien-1-yl)-5-ethylbarbituric acid	2,2-Dimethyl-3-(4-methoxyphenyl)-4-propyl-2H-1-benzopyran-7-ol acetate	Bensulfuron-methyl	Abacavir	2,4-Dichlorophenoxybutyric Acid		4-Hydroxy-16,18-tritriacontanedione
2,3,9,10-Tetrahydroxyberbine	5-(Methylthio)-2-[(methylthio)methyl]-2-pentenal	2,3,3',4,5-Pentachlorobiphenyl	Benthiavalicarb isopropyl	Acenaphthene	2,4-dihydroxy-2-heptenedioc acid		4-Hydroxy-2',3,5,5'-tetrachlorobiphenyl
2,3-di-0-hexanoyl-alpha-glucopyranose	5,10-Methylene-H4SPT	2,3,4,7,8-Pentachlorodibenzofuran	Benzo[a]pyrene-trans-11,12-dihydrodiol	Acephate	2,4-Dihydroxy-nitrophenol		4-Hydroxy-9-fluorenone
2,3-Dihydroxyvaleric acid	5,6-Dihydro-11-methoxyyangonin	2,3,5,6-Tetrachloro-4,4'-biphenyldiol	Berbamine	Acepromazine	2,4-Undecadiene-8,10-diynoic acid 2,3-dehydropiperidide		4-Hydroxy-N-desmethyltamoxifen
2,3-Diphenyl-1-indanone	5-Carboxypyranopelargonidin 3-O-beta-glucopyranoside	2,3,9,10-Tetrahydroxyberbine	beta-D-Glucopyranosyl anthranilate	Aclarubicin	2,5-Dibenzyl-3-hydroxy-6-methoxypyrazine		4-Hydroxynornantenine
2,3-epoxyphylloquinone	5-Chloro-1-piperidin-4-yl-1,3-dihydrobenzimidazol-2-one; R 29676	2,3-DCPE	Betamipron	Acyclovir	2,5-Dichloro-carboxymethylenebut-2-en-4-olide		4-Hydroxypenbutolol
2,3-Secoporrigenin	5'-Dehydroadenosine	2,3-di-0-hexanoyl-alpha-glucopyranose	beta-Snyderol	Adenosine thiamine diphosphate	2,6-Diamino-7-hydroxy-azelaic acid		4-Oxo-norfloxacin
2,4-Dinitrophenol	5-Hexatriacontanone	2,3-Dihydro-6-methyl-5-(5-methyl-2-furanyl)-1H-pyrrolizine	bis(4-fluorophenyl)-Methanone	Adlupulone	2,6-Dichlorophenol-4-(1,4-naphthoquinone imine)		5-(3,4-Dihydroxyphenyl)-5-ethylbarbituric acid
2,5-Diamino-6-(5-phospho-D-ribitylamino)pyrimidin-4(3H)-one	5Z,9Z,19Z-hexacosatrienoic acid	2,3-Dimercaptopropane-1-sulfonic acid	Bispyribac	Aerophobin 1	2,6-Dimethyl-2,4E,6E-octatriene		5-(3-Buten-1-ynyl)-2,2'-bithiophene
2,6-Diamino-4-nitrotoluene	5α-Cholestan-3β-Ol-6-One	2',4',4-Trihydroxy-3'-prenylchalcone 4'-O-glucoside	Bongkrekic acid	Aethusin	2,6-Dimethyl-3-[(2-methyl-3-furanyl)thio]-4-heptanone		5alpha-Cholane
2,6-Dichloroindophenol	5-δ-Hydroxybutyl Hydantoin	2,4-diamino-butyric acid	Borrerine	AG-126	2,6-Dimethyl-7-octene-1,6-diol 8-O-glucoside		5alpha-Cholestane
2-[4-(3-Hydroxypropyl)-2-methoxyphenoxy]-1,3-propanediol 1-glucoside	6-(((4aR,8aS)-octahydroquinolin-1(2H)-yl)sulfonyl)-1,2,3,4-tetrahydroquinoline	2,4-Dichlorophenoxybutyric Acid	BQ 485	AG-879	2,8-decadiene-4,6-diyn-1-al		5-Aminoimidazole ribonucleotide
2-[Octahydro-4,7-dimethyl-1-oxocyclopenta[c]pyran-3-yl]nepetalactam	6-(alpha-D-Glucosaminyl)-1D-myo-inositol	2,4-dihydroxy-2-heptenedioc acid	Bremazocine	AL 8810	2,8-Dihydroxyquinoline-beta-D-glucuronide		5'-Deoxy-5'-fluoroadenosine
20:2(5Z,9Z)(11Me,15Me,19Me)	6-Epi-7-isocucurbic acid glucoside	2,4-Dihydroxy-nitrophenol	Bupirimate	a-L-Arabinofuranosyl-(1->2)-[a-D-mannopyranosyl-(1->6)]-D-mannose	2-[3-Carboxy-3-(methylammonio)propyl]-L-histidine		5-Fluorouridine
20-fluoro-9Z-eicosenoic acid	6-hydroxy-2,4-hexadienal	2,5-Diamino-6-(5-phospho-D-ribitylamino)pyrimidin-4(3H)-one	Bupropion	Alcophosphamide	202-791		5-Hydroxymethylcimetidine
20-hydroxy-LTE4	6-Hydroxycyanidin 3-glucoside	2,5-Dibenzyl-3-hydroxy-6-methoxypyrazine	Butralin	Alliin	21-Fluoro-11beta,17-dihydroxy-6alpha-methylpregn-4-ene-3,20-dione		5-Methyl-2-thiophenecarboxaldehyde
20-oxo-heneicosanoic acid	6-Hydroxydexamethasone	2,5-Dichloro-carboxymethylenebut-2-en-4-olide	Cabazitaxel	Alliospiroside C	21-Fluoro-11beta-hydroxypregn-4-ene-3,20-dione		5-Methylcytidine
20-trifluoro-LTB4	6-Hydroxykaempferol 7,4'-dimethyl ether 3-sulfate	2,6-Diamino-7-hydroxy-azelaic acid	Calamin	Allopumiliotoxin 267A	21-Hydroxypregn-4-ene-3,20-dione hydrogen succinate		5-Nitro-2-Phenylpropylaminobenzoic Acid [Nppb]
22-Acetylpriverogenin B	6-Hydroxykynurenate	2,6-Dichlorophenol-4-(1,4-naphthoquinone imine)	Caloxanthin sulfate	alpha,alpha'-diethyl-3,4,4'-stilbenetriol	21-hydroxypregnenolone		5-O-Desmethyldonepezil
22R-hydroxycholesterol(d7)	6-Hydroxymelatonin	2,6-Dimethyl-3-[(2-methyl-3-furanyl)thio]-4-heptanone	Calpurnine	alpha,alpha'-Trehalose 4,6-dioleate	22:1 Campesteryl ester		5-O-Feruloylnigrumin
24,24-Difluoro-1,25,26-trihydroxyvitamin D3	6-Hydroxyondansetron sulfate	2,6-Dimethyl-7-octene-1,6-diol 8-O-glucoside	Cannabidiolic acid	alpha,alpha'-Trehalose 6-palmitate	23-Hydroxyphysalolactone		5-Pentacosyl-1,3-benzenediol
24,25-epoxy-1α-hydroxyvitamin D3 / 24,25-epoxy-1α-hydroxycholecalciferol	6-Imino-5-oxocyclohexa-1,3-dienecarboxylate	2,8-Dihydroxyquinoline-beta-D-glucuronide	Carajurin	alpha,beta-Didehydrotryptophan	24-(dimethoxyphosphoryl)-25,26,27-trinorvitamin D3 / 24-(dimethoxyphosphoryl)-25,26,27-trinorcholecalciferol		5Z,27Z-Tritriacontadiene
24a,24b-epoxy-23-tetradehydro-24a,24b-dihomo-1α,25-dihydroxyvitamin D3 / 24a,24b-epoxy-23-tetradehydro-24a,24b-dihomo-1α,25-dihydroxycholecalciferol	6-N,4-diphenyl-1,4-dihydro-1,3,5-triazine-2,6-diamine	2-[3-Carboxy-3-(methylammonio)propyl]-L-histidine	Carboxyterbinafine	Alvimopan	24,24-difluoro-1α,25-dihydroxy-26,27-dimethyl-24a-homovitamin D3 / 24,24-difluoro-1α,25-dihydroxy-26,27-dimethyl-24a-homocholecalciferol		5α-Cholestane-3α,7α,26-triol
25-Cinnamoyl-vulgaroside	6α-Hydroxycampestanol	2-[4-(3-Hydroxypropyl)-2-methoxyphenoxy]-1,3-propanediol 1-glucoside	Cartilagineal	AM2201 7-hydroxyindole metabolite	24,24-Difluoro-25-hydroxy-26,27-dimethylvitamin D3		6,8a-Seco-6,8a-deoxy-5-oxoavermectin ''1b'' aglycone
25-hydroxy-1α-hydroxymethyl-16,17-didehydrovitamin D3 / 25-hydroxy-1α-hydroxymethyl-16,17-didehydrocholecalciferol	6α-Hydroxy-castasterone	2-[Octahydro-4,7-dimethyl-1-oxocyclopenta[c]pyran-3-yl]nepetalactam	Carvedilol glucuronide	AM2232	24-methylene-cholesterol sulfate		6-[5]-ladderane-1-hexanol
25-Hydroxy-24-epi-brassinolide	7,3'-Dihydroxy-4'-methoxyflavan	202-791	Catalpol	AM3102	26-(2-Glucosyl-6-acetylglucosyl]-1,3,11,22-tetrahydroxyergosta-5,24-dien-26-oate		6alpha-Fluoropregn-4-ene-3,11,20-trione
25-Hydroxyvitamin D2 25-(beta-glucuronide)	7alpha,12alpha,25-Trihydroxycholest-4-en-3-one	21-Fluoro-11beta-hydroxypregn-4-ene-3,20-dione	Catechin 7,3'-di-O-gallate	Amodiaquine	26,26,26,27,27,27-hexafluoro-1α,24-dihydroxyvitamin D3 / 26,26,26,27,27,27-hexafluoro-1α,24-dihydroxycholecalciferol		6'-Apiosyllotaustralin
25-O-(2''-beta-D-glucopyranosyl-beta-D-glucopyranosyl)-25-hydroxy-11E-eicosenoic acid	7-Aminonitrazepam	21-hydroxypregnenolone	CAY10443	Anabasamine	26,26,26,27,27,27-hexafluoro-25-hydroxy-23,23,24,24-tetradehydrovitamin D3 / 26,26,26,27,27,27-hexafluoro-25-hydroxy-23,23,24,24-tetradehydrocholecalciferol		6beta,19-Epoxy-17beta-hydroxyandrost-4-en-3-one
26,26,26,27,27,27-hexafluoro-1α,25-dihydroxy-23,23,24,24-tetradehydrovitamin D3 / 26,26,26,27,27,27-hexafluoro-1α,25-dihydroxy-23,23,24,24-tetradehydrocholecalciferol	7-Methoxy-6-methyl-2H-1-benzopyran-2-one	23-Hydroxyphysalolactone	CAY10502	Anandamide (20:3, n-3)	26-Glucosyl-1,3,11,22-tetrahydroxyergosta-5,24-dien-26-oate		6-Chloro-1,3,5-triazine-2,4(1H,3H)-dione
26,26,26-trifluoro-25-hydroxyvitamin D3 / 26,26,26-trifluoro-25-hydroxycholecalciferol	7-Methylinosine	24,24-difluoro-1α,25-dihydroxy-24a-homovitamin D3 / 24,24-difluoro-1α,25-dihydroxy-24a-homocholecalciferol	CAY10508	Anatalline	26-hydroxycholesterol 3-sulfate		6-Deoxodolichosterone
26,27-diethyl-1α,25-dihydroxy-22-thia-20-epivitamin D3 / 26,27-diethyl-1α,25-dihydroxy-22-thia-20-epicholecalciferol	7-O-Methyllicoricidin	24,24-difluoro-1α,25-dihydroxy-26,27-dimethyl-24a-homovitamin D3 / 24,24-difluoro-1α,25-dihydroxy-26,27-dimethyl-24a-homocholecalciferol	CAY10618	Androsterone glucuronide	27:2(5Z,9Z)(6Br)		6-HydroxyKetanserin
28-Glucosyl-3b,23-dihydroxy-12,19(29)-ursadien-28-oate 3-arabinoside	7-Sulfocholyltaurine	24,24-Difluoro-25-hydroxy-26,27-dimethylvitamin D3	CDP-DG(12:0/12:0)	Anthragallol	2alpha,7beta,15beta,18-tetraacetoxy-cholest-5-en-3alpha-ol		6-Methyl-2-methylene-6-octene-1,3,8-triol
28-Glucosyloleanolic acid 3-[arabinosyl-(1->2)-6-methylglucuronide]	8'-apo-beta-carotenol	24a,24b-epoxy-23-tetradehydro-24a,24b-dihomo-1α,25-dihydroxyvitamin D3 / 24a,24b-epoxy-23-tetradehydro-24a,24b-dihomo-1α,25-dihydroxycholecalciferol	Ceftibuten	Antrafenine	2alpha-Hydroxypyracrenic acid		6'-Sialyllactosamine
29-demethylgeodisterol-O-sulfite	8α-estra-1,3,5(10)-trien-3,17β-diol	25-Hydroxy-24-epi-brassinolide	Centellasapogenol A	Aquifoliunine EIV	2-Amino-1,6-dimethylfuro[3,2-e]imidazo[4,5-b]pyridine		6-Sinapoylglucoraphenin
2alpha,3alpha-(Difluoromethylene)-5alpha-androstan-17beta-ol acetate	9,10-Dihydrokadsurenone	25-O-(2''-beta-D-glucopyranosyl-beta-D-glucopyranosyl)-25-hydroxy-11E-eicosenoic acid	Cer(d18:0/13:0)	Arachidonic Acid Leelamide	2-Amino-2-Norbornanecarboxylic acid		7,8-dichloro-hexadecanoic acid
2alpha-Fluoro-17beta-hydroxyandrost-4-en-3-one	9alpha-Hydroxyandrosta-1,4-diene-3,17-dione	26,26,26,27,27,27-hexafluoro-1α,25-dihydroxy-23,23,24,24-tetradehydrovitamin D3 / 26,26,26,27,27,27-hexafluoro-1α,25-dihydroxy-23,23,24,24-tetradehydrocholecalciferol	Cer(d18:0/17:0)	Arachidonoyl Ethanolamide-d8	2-Amino-3,4-dihydroxypentanedioic acid		7alpha-hydroxy-4-cholesten-3-one-d7
2-Amino-4-oxo-6-(1',2',3'-trihydroxypropyl)-diquinoid-7,8-dihydroxypterin	9-chloro-10-hydroxy-hexadecanoic acid	26,26,26,27,27,27-hexafluoro-25-hydroxy-23,23,24,24-tetradehydrovitamin D3 / 26,26,26,27,27,27-hexafluoro-25-hydroxy-23,23,24,24-tetradehydrocholecalciferol	Cer(d18:2/20:0)	Arachidonoylmorpholine	2-Amino-4-nitrotoluene		7-Aminomethyl-7-carbaguanine
2'-Aminobiphenyl-2,3-diol	9-Fluoroprednisolone	26,26,26-trifluoro-25-hydroxyvitamin D3 / 26,26,26-trifluoro-25-hydroxycholecalciferol	Ceramide (d18:1/22:0)	Arg Arg Lys	2-Amino-5-nitrobenzophenone		7-Hydroxychlorpromazine
2-Aminoethylphosphocholate	A 922500	26-Glucosyl-1,3,11,22-tetrahydroxyergosta-5,24-dien-26-oate	Chalcone	Arg Gly His	2-Aminoacridone		7-Methyl-3-methylene-1,6,7-octanetriol
2-Butyl-1-octanol	a-[1-(diethylamino)ethyl]-p-hydroxy-Benzyl alcohol	28-Glucosyl-3b,23-dihydroxy-12,19(29)-ursadien-28-oate 3-arabinoside	Cheritamine	Arg Gly Met	2-Aminoadenosine		7-Methylxanthosine
2-carboxy-2-amino-3-O-(13'-methyltetradecanoyl)-4-hydroxy-17-methyloctadec-5-ene-1-sulfonic acid	AB005	29-demethylgeodisterol-O-sulfite	Chivosazole B	Arg Gly Trp	2-Carboxy-1-[5-(2-carboxy-1-pyrrolidinyl)-2-hydroxy-2,4-pentadienylidene]pyrrolidinium		7Z,9Z-Heptadecadiene
2'-Carboxy-4-[bis(2-chloroethyl)amino]-2-methylazobenzene	Abienol	2-Acetyl-1,5,6,7-tetrahydro-6-hydroxy-7-(hydroxymethyl)-4H-azepine-4-one	Chlorambucil	Arg Phe Phe	2-Carboxyarabinitol 5-phosphate		7α-(Thiomethyl)spironolactone
2D-5-O-Methyl-2,3,5/4,6-pentahydroxycyclohexanone	Acidissiminin epoxide	2-Amino-3,4-dihydroxypentanedioic acid	Chlorbicyclen	Arg Thr Thr	2-Chloro-1,4-naphthoquinone		8-Allyl-2-phenyl-8H-1,3a,8-triaza-cyclopenta[a]indene
2'-Deoxyinosine triphosphate	Acyclovir	2-Amino-4-oxo-6-(1',2',3'-trihydroxypropyl)-diquinoid-7,8-dihydroxypterin	Chlormadinone acetate	Argiotoxin 636	2-deoxyecdysone 22-phosphate		8-Hydroxycarteolol
2-Ethyl-1-hexanol sulfate	Adenosine 5-O-(3-thiotriphophate)	2-Aminoacridone	Chloromarmin	Aromatized deshydroxy-C-1027 chromophore	2-Deoxystreptidine		9,10,12,13-tetrabromo-stearic acid
2-Ethylethcathinone	Adifoline	2-Benzoxazolol	cholesteryl beta-D-glucoside	Artemoin A	2-Ethylacrylylcarnitine		9,9-dibromo-8-nonenoic acid
2-glyceryl-PGF2α	Adlupulone	2-Carboxy-1-[5-(2-carboxy-1-pyrrolidinyl)-2-hydroxy-2,4-pentadienylidene]pyrrolidinium	Cilazapril	AS 1-2	2H-1-Benzopyran-2-one, 6-(1,2-dihydroxyethyl)-7-hydroxy-8-methoxy- glucuronide		A 80987
2H-1-Benzopyran-2-one, 6-(1,2-dihydroxyethyl)-7-hydroxy-8-methoxy-	Adouetine Z	2-carboxy-2-amino-3-O-(13'-methyltetradecanoyl)-4-hydroxy-17-methyloctadec-5-ene-1-sulfonic acid	Cinnatriacetin A	Asn Met Pro	2-Hydroxy-1,4-benzoquinone		A2E
2H-1-Benzopyran-6-acetic acid, 7-hydroxy-8-methoxy-2-oxo-	Aerophobin 1	2-Carboxyarabinitol 5-phosphate	CITCO	Asperuloside	2-Hydroxy-3-carboxy-6-oxo-7-methylocta-2,4-dienoate		A47934
2H-Indol-2-one, 1,3-dihydro-7-hydroxy-4-[2-(propylamino)ethyl]- glucuronide	Aflatoxin B1exo-8,9-epoxide-GSH	2-Chloro-1,4-naphthoquinone	Clindamycin	Asp-Gly-OH	2-Hydroxy-6-oxo-6-(2-hydroxyphenyl)-hexa-2,4-dienoate		AAPH
2-Hydroxy-24-keto-octacosanolide	AG-041R	2-C-Methyl-D-erythritol 4-phosphate	Clitidine 5'-phosphate	Assamsaponin B	2-Hydroxybenzaldehyde O-[xylosyl-(1->6)-glucoside]		Abacavir
2-hydroxy-4- (methylthio) butyric acid	AG-1296	2'-Deoxyinosine triphosphate	Cob(I)yrinate a,c diamide	Astrasieversianin XVI	2-Hydroxydesmethylimipramine glucuronide		Abu-Ile-OH
2-Hydroxy-6-oxonona-2,4-diene-1,9-dioate	Agavegenin A	2-Deoxystreptidine	Cofaryloside	Atheroline	2-Hydroxyfluorene		Acenaphthene
2-Hydroxyethanesulfonate	Agelasine	2-Ethyl-1-hexanol sulfate	Compound II(R/S)	Atracurium	2-Methoxyestrone 3-glucuronide		Acetriazoic Acid
2-Hydroxytrimipramine	AL-294	2-Ethylacrylylcarnitine	Compound IV	Austalide G	2-Methyl-3-hydroxy-5-formylpyridine-4-carboxylate		Acetyl-maltose
2-Iodo-6-methoxyphenol	Ala Arg Ser	2H-1-Benzopyran-2-one, 6-(1,2-dihydroxyethyl)-7-hydroxy-8-methoxy-	Cucurbitacin I 2-glucoside	Avenestergenin A1	2-methyl-hopane-17beta,21beta-homohopanol		Acidissiminol epoxide
2-Methoxy-3-(1-methylpropyl)pyrazine	Ala Asp His	2H-1-Benzopyran-6-acetic acid, 7-hydroxy-8-methoxy-2-oxo-	Cyanidin 3-arabinoside	Avermectin B2a	2-Naphthalenesulfonic acid		Acrifoline
2-methyl-4-phenyl Thiazole	Ala Gln Lys	2-Hydroxy-1,4-benzoquinone	Cyclopamine	Avermectin B2b aglycone	2-O-(beta-D-galactopyranosyl-(1->6)-beta-D-galactopyranosyl) 2S-hydroxytridecanoic acid		Acrovestone
2-Methylaminoadenosine	Alangimarine	2-Hydroxy-3-carboxy-6-oxo-7-methylocta-2,4-dienoate	Cycloxydim	Azaspiracid 2	2-O-[2-O-(alpha-D-Mannopyranosyl)-alpha-D-glucopyranosyl]-3-phospho-D-glycerate		Actinamine
2-methylbacteriohopane-32,33,34,35-tetrol	a-L-Arabinofuranosyl-(1->2)-[a-D-mannopyranosyl-(1->6)]-D-mannose	2-hydroxy-4- (methylthio) butyric acid	Cyproheptadine (hydroxylated aromatic)	Azelastine	2-Oxo-3-hydroxy-4-phosphobutanoate		Acutissimin A
2-Nor-1,3-seco-1α,25-dihydroxyvitamin D3	All trans decaprenyl diphosphate	2-Hydroxy-6-oxonona-2,4-diene-1,9-dioate	Cys Cys Phe	Azoxystrobin	2-Oxosuberate		Akeboside Ste
2-O-(beta-D-galactopyranosyl-(1->6)-beta-D-galactopyranosyl) 2S,3R-dihydroxytridecanoic acid	all-trans-pentaprenyl diphosphate	2-Hydroxydesmethylimipramine glucuronide	Cys Glu Pro	bacteriohopane-32,33-diol-34,35-dicarbamate	2-Phenylaminoadenosine		Ala Glu His
2-O-beta-D-Glucopyranuronosyl-D-mannose	alNAcbeta1-4(NeuGcalpha2-3)Galbeta1-4Glcbeta-Cer(d18:1/24:0)	2-Hydroxyethanesulfonate	Cys His Trp	Baicalein 5,6,7-trimethyl ether	2-Phenylethyl butanoate		Ala Pro Ala
2-Octylglycerol	alpha-Ergocryptine	2-Iodo-6-methoxyphenol	Dalfopristin	Balsalazide	2-Phosphinomethylmalate		Ala Trp Tyr
2-O-p-Coumaroyltartronic acid	AM2201 7-hydroxyindole metabolite	2-Methyl-3-hydroxy-5-formylpyridine-4-carboxylate	Danazol	Benazepril	2-Phthalimidoglutaramic acid		Aldrin
2-O-Protocatechuoylalphitolic acid	AM2232	2-methylbacteriohopane-32,33,34,35-tetrol	Decaprenyl phosphate	Benz[a]acridine	2-Pyrrolidinone, 4-(2-aminoethyl)-1-ethyl-3,3-diphenyl- (AHR 5904)		alpha,alpha'-diethyl-3,4,4'-stilbenetriol
2-Phenyl-1,3-propanediyl monocarbamate	Ametryn	2-methyl-hopane-17beta,21beta-homohopanol	Dehydroconicasterol	Benzhydrylpiperazine	2α-Fluoro-19-nor-22-oxa-1α,25-dihydroxyvitamin D3		alpha,alpha'-Trehalose 6-palmitate
2R-hydroperoxy-9Z,12Z,15Z-octadecatrienoic acid	Amphibine A	2-Naphthalenesulfonic acid	Deltaline	BIBF 1120	3-(1-Hydroxymethyl-1-propenyl)pentanedioic acid		alpha-Eucaine
2-thio-Acetyl MAGE	Anandamide (20:3, n-3)	2-O-beta-D-Glucopyranuronosyl-D-mannose	Deoxycorticosterone	Biocytin	3-(4-Hydroxy-3-methoxyphenyl)-1,2-propanediol 2-O-(galloyl-glucoside)		Alpha-linolenyl carnitine
2-Undecyl-4(1H)-quinolinone	Anethole	2-O-p-Coumaroyltartronic acid	Deoxygedunin	Borrelidin	3-(m-Aminophenyl)-2-(p-methoxyphenyl)acrylonitrile		Alvimopan
2α-chloro-1β,25-dihydroxyvitamin D3 / 2α-chloro-1β,25-dihydroxycholecalciferol	Angolensic Acid, Methyl Ester	2-O-Protocatechuoylalphitolic acid	Deoxykhivorin	Bromacil	3,17-Dihydroxyvecuronium		Aminofructose 6-phosphate
2β-methyl-20-epi-1β,25-dihydroxyvitamin D3 / 2β-methyl-20-epi-1β,25-dihydroxycholecalciferol	Anhydroicaritin 3-rhamnosyl-(1->2)-rhamnoside	2-Oxo-3-hydroxy-4-phosphobutanoate	Deoxythymidine diphosphate-l-rhamnose	Bromopride	3,4-DAA		Aminohippuric acid
3-(2'-Methylthio)ethylmalic acid	Arg Arg Asn	2-Phenyl-1,3-propanediyl monocarbamate	Dextrorphan glucuronide	Butachlor	3,4-Dicaffeoyl-1,5-quinolactone		Amitenone
3-(3,4-Dihydroxyphenyl)-1-propanol 3'-glucoside	Arg Arg Ile	2-Phenylethyl butanoate	DG(12:0/16:1(9Z)/0:0)[iso2]	Butroxydim	3,4-Dichlorophenol		Amlaic acid
3,3',5-Triiodothyropropionic acid	Arg Asn Asp	2-Phosphinomethylmalate	DG(13:0/18:1(9Z)/0:0)[iso2]	C-13(2)-Carboxypyropheophorbide a	3,4-Dihydroxy-2-butanone 4-phosphate		Ampicillin
3',4'-Anhydrovinblastine	Arg Asp Trp	2-Phthalimidoglutaramic acid	DG(13:0/20:4(5Z,8Z,11Z,14Z)/0:0)[iso2]	Calpeptin	3,5,6-Trihydroxy-5-(hydroxymethyl)-2-methoxy-2-cyclohexen-1-one		AM-toxin I
3,4-Dehydrothiomorpholine-3-carboxylate	Arg Glu Arg	2α-chloro-1β,25-dihydroxyvitamin D3 / 2α-chloro-1β,25-dihydroxycholecalciferol	DG(20:1(11Z)/14:0/0:0)	Capillin	3,5-Dihydroxy-phenylglycine		Anatalline
3,5-Dibromo-4-hydroxybenzamide	Arg Glu Phe	3-(2'-Methylthio)ethylmalic acid	DG(20:2(11Z,14Z)/20:0/0:0)	Capsorubinidione	3,5-Diiodo-4-hydroxyphenylpyruvate		Androsterone glucuronide
3,5-Dichloro-4-hydroxyphenylpyruvate	Arg Gly His	3-(3,4-Dihydroxyphenyl)-1-propanol 3'-glucoside	DG(20:3(8Z,11Z,14Z)/18:4(6Z,9Z,12Z,15Z)/0:0)	Cardanolide skeleton	3,5-Dinitro-L-tyrosine		Anhydrorhodovibrin
3,5-Didecanoylpyridine	Arg Gly Pro	3-(4-Hydroxy-3-methoxyphenyl)-1,2-propanediol 2-O-(galloyl-glucoside)	DG(22:6(4Z,7Z,10Z,13Z,16Z,19Z)/20:2(11Z,14Z)/0:0)	Carmabin A	3,6-Dihydro-4-(4-methyl-3-pentenyl)-1,2-dithiin		Anilazine
3,6,8-Trimethylallantoin	Arg Gly Trp	3,17-Dihydroxyvecuronium	DG(22:6(4Z,7Z,10Z,13Z,16Z,19Z)/22:4(7Z,10Z,13Z,16Z)/0:0)	Carmofur	3,6-Dihydronicotinic acid		Anisessine
3,6-Epoxy-5,5',6,6'-tetrahydro-b,b-carotene-3',5,5',6'-tetrol	Arg His His	3,3',5-Triiodothyropropionic acid	DGCC(16:0/20:5)	CAY10565	3,6-Dimethoxyestra-1,3,5(10),6,8-pentaene-17beta-carboxylic acid methyl ester		Anisomycin
3,7-Dimethyl-3-octene-1,2,6,7-tetrol	Arg Lys Lys	3',4'-Anhydrovinblastine	Diethatyl-ethyl	CAY10585	3-[(2-Methyl-3-furanyl)thio]-4-heptanone		Annohexocin
3,8-Dimethyldec-7-en-1-yl trihydrogen diphosphate	Arg Thr Thr	3,4-DAA	Diethylpropion(metabolite X-glucuronide)	CB-13	35-aminobacteriohopane-30,31,32,33,34-pentol		Ansamitocin P3
3-[(2-Mercapto-1-methylpropyl)thio]-2-butanol	Arg Trp Trp	3,4-Dehydrothiomorpholine-3-carboxylate	Difluprednate	CDP-4-dehydro-3,6-dideoxy-D-glucose	3a,7b,12a-Trihydroxyoxocholanyl-Glycine		Antanapeptin A
3alpha,15alpha-Diacetoxy-(22R)-hydroxylanosta-7,9(11),24-trien-26-oic acid	Argiotoxin 636	3,4-Dicaffeoyl-1,5-quinolactone	Dihydro-2,4,6-tris(2-methylpropyl)-4h-1,3,5-dithiazine	CDP-DG(18:0/22:6(4Z,7Z,10Z,13Z,16Z,19Z))	3-Acetyl-1,2-dithiolane		antioside
3alpha,7alpha,12alpha-Trihydroxy-5beta-23E-cholestan-26-oic acid	Armillyl orsellinate	3,4-Dichlorophenol	Dihydro-4,6-dimethyl-2-(1-methylethyl)-4H-1,3,5-dithiazine	Cephalothin	3-Acetyl-2,5-dimethylfuran		Aphyllic Acid
3beta,15alpha-Diacetoxylanosta-8,24-dien-26-oic acid	Artemoin A	3,5,6-Trihydroxy-5-(hydroxymethyl)-2-methoxy-2-cyclohexen-1-one	Dihydroptaeroxylin	Cer(d18:0/15:0)	3-Amino-2-naphthoic acid		Arachidonic Acid Leelamide
3beta-Fluoro-5beta-pregnan-20-one	Artonin Q	3,5-Dibromo-4-hydroxybenzamide	Dihydrostreptomycin	Cer(d18:0/22:0)	3-Benzoyloxy-11-oxo-12-ursen-28-oic acid		Arachidonoyl Cyclopropylamide
3beta-Hydroxy-16-phosphonopregn-5-en-20-one monoethyl ester	Asn Asn Asn	3,5-Dichloro-4-hydroxyphenylpyruvate	Diisopropyl sulfate	Cer(d18:0/h17:0)	3b-Hydroxy-6b-(3-chloro-2-hydroxy-2-methylbutanoyloxy)-7(11)-eremophilen-12,8b-olide		Arachidonoylmorpholine
3beta-Methoxy-7-multiflorene	Asn Asn Gln	3,5-Diiodo-4-hydroxyphenylpyruvate	Dimethylenetriurea	Cer(d18:2/15:0)	3-Carboxypropyl trimethylammonium		Arachidyl linoleate
3b-Pregnadienolone 3-[rhamnosyl-(1->4)-rhamnosyl-(1->4)-rhamnosyl-(1->4)-glucoside]	Asp Asp Trp	3,6,8-Trimethylallantoin	dinor-12-oxo Phytodienoic Acid-d5	Cer(t18:0/16:0(2OH))	3-Deazaneplanocin A		Arbutin
3-Chloro-8β-Hydroxycarapin, 3,8-Hemiacetal	Asp Glu Lys	3,6-Dihydronicotinic acid	Dioncophylline C	Cetiedil	3-Deoxy-3-azido-25-hydroxyvitamin D3		Archaeol
3-dodecanoyl-NBD Cholesterol	Asparagoside B	35-aminobacteriohopane-30,31,32,33,34-pentol	Dipiperamide A	CG 4305	3'-Glucosyl-2',4',6'-trihydroxyacetophenone		Arg Arg Phe
3-Furanmethanol glucoside	Astaxanthin glucoside	35-aminobacteriohopane-31,32,33,34-tetrol	Dipropetryn	Chalcomycin	3-Hydroxy-2-(4-methylbenzoyl)-4H-1-benzopyran-4-one		Arg Cys His
3-Geranyl-4,2',4',6'-tetrahydroxy-5-prenyldihydrochalcone	Asticolorin A	3-Acetyl-1,2-dithiolane	DL-Methionine sulfoxide	Chalepensin	3-Hydroxy-2-(4-morpholinylmethyl)estra-1,3,5(10)-trien-17-one		Arg Gly Tyr
3-hexanoyl-NBD Cholesterol	ATB-343	3alpha,15alpha-Diacetoxy-(22R)-hydroxylanosta-7,9(11),24-trien-26-oic acid	Dolichyl beta-D-mannosyl phosphate	Chlordane	3-Hydroxy-carbofuran		Arg Ile Tyr
3-Hexaprenyl-4,5-Dihydroxybenzoic acid	Austalide G	3beta-(3-methyl-butanoyloxy)-villanovane-13alpha,17-diol	D-Phe-Pro-Arg-CH2Cl	Chlorzoxazone	3-hydroxy-dodecanedioic acid		Argininic acid
3-Hydroxylidocaine glucuronide	Avermectin B1b monosaccharide	3beta,15alpha-Diacetoxylanosta-8,24-dien-26-oic acid	Ergoline-8-methanol, 10-methoxy-1,6-dimethyl-	Chondrillasterol 3-[glucosyl-(1->2)-glucosyl-(1->2)-glucoside]	3-Hydroxyethylbacteriochlorophyllide a		Armillane
3-Hydroxy-OPC8-CoA	Avermectin B2b aglycone	3beta-Fluoro-5beta-pregnan-20-one	Erinacine C	Chondrillasterol 3-[glucosyl-(1->4)-glucoside]	3-Hydroxy-N-methylpyridinium		Armillarivin
3-Hydroxypicolinic acid	Avizafone	3beta-Methoxy-7-multiflorene	Erythrinin A	Chymostatin	3-Hydroxynorzotepine sulfate		Aromatized deshydroxy-C-1027 chromophore
3-Methylcholanthrene	Azelastine	3b-Hydroxy-6b-(3-chloro-2-hydroxy-2-methylbutanoyloxy)-7(11)-eremophilen-12,8b-olide	Eschscholtzxanthone	Cilastatin	3''-HydroxyPravastatin		Aryl beta-D-glucoside
3-Morpholinosydnonimine	Azoxystrobin	3b-Pregnadienolone 3-[rhamnosyl-(1->4)-rhamnosyl-(1->4)-rhamnosyl-(1->4)-glucoside]	ethyl-2,4-dimethyl-Thiazole-5-Carboxylate	Cinnamtannin B2	3-hydroxy-tetradecanedioic acid		AS-1269574
3'-N'-Acetylfusarochromanone	Bannamurpanisin	3-Carboxypropyl trimethylammonium	Etoxazole	Cinnarizine	3-Methyldioxyindole		Asclepin
3-O-(2-O-(2E-decenoyl)-alpha-L-rhamnopyranosyl-(1-2)-alpha-L-rhamnopyranosyl)-3-hydroxydecanoic acid	Barban	3-Deoxy-3-azido-25-hydroxyvitamin D3	Eugenyl Benzoate	Citalopram alcohol	3-O-(2-O-(2E-decenoyl)-alpha-L-rhamnopyranosyl)-3-hydroxydecanoic acid		Asn Asn Gly
3-O-(alpha-l-rhamnopyranosyl-(1-4)-beta-D-glucopyranosyl)-26-O-(beta-D-glucopyranosyl)-(25R)-spirost-5-en-3beta-ol	BAY-11-7082	3-dodecanoyl-NBD Cholesterol	Euphornin	Citalopram propionic acid	3-O-L-rhamnosyl-3-hydroxydecanoyl-3-hydroxydecanoic acid		Asn Glu Ile
3-O-(Glcb)-6-O-(Glcb)-(25R)-5alpha-spirostan-3beta,6alpha,23S-triol	BAY-60-7550	3-Furanmethanol glucoside	Evans blue	Citbrasine	3-O-Methylisoproterenol		Asn Pro
3-O-acetylecdysone 2-phosphate	BEC	3'-Glucosyl-2',4',6'-trihydroxyacetophenone	Evasterioside E	CL(18:2(9Z,12Z)/18:2(9Z,12Z)/18:2(9Z,12Z)/18:3(6Z,9Z,12Z))	3-O-Methylniveusin A		Asp Arg Ala
3'-O-methylbatatasin III	Benazepril	3-Hydroxy-2-(4-methylbenzoyl)-4H-1-benzopyran-4-one	Evodiamine	CL(22:6(4Z,7Z,10Z,13Z,16Z,19Z)/18:2(9Z,12Z)/18:2(9Z,12Z)/18:1(11Z))	3-O-Mycarosylerythronolide B		Asp His His
3-O-Methylrimiterol glucuronide	Benazeprilat	3-Hydroxyethylbacteriochlorophyllide a	Falcarindione	CL(22:6(4Z,7Z,10Z,13Z,16Z,19Z)/20:3(8Z,11Z,14Z)/18:2(9Z,12Z)/18:1(11Z))	3-O-Protocatechuoylceanothic acid		Asp His Lys
3-O-Sulfogalactosylceramide	Bendroflumethiazide	3-Hydroxymorphinan	Fasciculol E	Clemastine	3-Oxa-9-azoniatricyclo[3.3.1.02,4]nonane, 9-ethyl-7-hydroxy-9-methyl-		Asp Phe Asp
3-oxo-tricosanoic acid	Benthiavalicarb isopropyl	3-Hydroxy-N-methylpyridinium	Fenofibryl glucuronide	clobetasone	3-Oxopregn-4-ene-20beta-carboxaldehyde dioxime		Aspidin
3-Phenylpropyl glucosinolate	Benzaldehyde	3-Hydroxynorzotepine sulfate	FK-866	Clofibrate	3-Oxotetradecanoyl-CoA		Aspulvinone H
3'-Prenylrubranine	Benzethonium	3-Hydroxy-OPC8-CoA	Fluconazole	CoA(18:0(3OH))	3-propylmalic acid		Atherosperminine
3-Tritriacontanone	Berberrubine	3-Hydroxypicolinic acid	Fluenetil	CoA(20:5(5Z,8Z,11Z,14Z,17Z))	3-Sulfocatechol		Avermectin A2a aglycone
3-Vinylbacteriochlorophyllide d	Biapenem	3-Hydroxysintaxanthin	Fluprostenol isopropyl ester	Coenzyme Q9	3-Thiophenemethanol		Azaspiracid 3
3Z,6Z,9Z-Tricosatriene	Biocytin	3-Methyldioxyindole	Fluprostenol serinol amide	Conivaptan	3-trans-Caffeoyltormentic acid		Azoprocarbazine
3Z-Hexenyl 2R-hydroxy-3-methylbutyrate	Bis(2,5-dimethyl-3-furanyl) disulfide	3'-N'-Acetylfusarochromanone	Foeniculoside III	Cortisol 21-acetate	3α,5α-Tetrahydronorethindrone glucuronide		Batrachotoxin
3α,21-Dihydroxy-5β-pregnane-11,20-dione	Bis(2-furanylmethyl) sulfide	3-O-(2-O-(2E-decenoyl)-alpha-L-rhamnopyranosyl-(1-2)-alpha-L-rhamnopyranosyl)-3-hydroxydecanoic acid	Folic acid	Cumyluron	4-(2-Furanyl)-3-buten-2-one		BAY-41-8543
3α,9α-Dihydroxy-11-oxo-5β-cholan-24-oic Acid	Bis(m-methanethiolato)tetranitrosyldiiron	3-O-(alpha-l-rhamnopyranosyl-(1-4)-beta-D-glucopyranosyl)-26-O-(beta-D-glucopyranosyl)-(25R)-spirost-5-en-3beta-ol	Fukiic acid	Cyaniden 3-rutinoside-5,3'-diglucoside	4'-(Dimethylamino)azoxybenzene n-oxide		Benquinox
3α-androstanediol glucuronide	Bisdesethylchloroquine	3-O-(beta-D-glucopyranosyl-(1->6)-beta-D-glucopyranosyl) ethyl 3-hydroxyoctanoate	Galbeta1-4GlcNAcbeta1-3Galbeta1-4GlcNAcbeta1-3Galbeta1-4Glcbeta-Cer(d18:1/20:0)	Cyanidin 3-O-[2''-O-(xylosyl)-6''-O-(p-coumaroyl) glucoside] 5-O-malonylglucoside	4-(o-Carboxybenzamido)glutaramic acid		Benzimidazole
3α-Hydroxychol-5-en-24-oic Acid	Bisnorbadioquinone A	3-O-acetylecdysone 2-phosphate	Gallamine	Cyanidin 3-O-[2''-O-(xylosyl)-6''-O-(p-O-(glucosyl)-p-coumaroyl) glucoside] 5-O-glucoside	4,4'-(Diphenylethenylidene)bis[N,N-dimethylbenzenamine]		Benzquinamide
4-(2-Nitroethyl)phenyl primeveroside	Bisphenol A dimethacrylate	3-O-L-rhamnosyl-3-hydroxydecanoyl-3-hydroxydecanoic acid	Gallic acid	Cycluron	4,4'-Diaminodiphenyl ether		Bevantolol
4-(L-Alanin-3-yl)-2-hydroxy-cis,cis-muconate 6-semialdehyde	Bispyribac	3'-O-methylbatatasin III	gamma-Chaconine	Cyprodinil	4,4'-Dichlorobenzophenone		Bikoeniquinone A
4-(Methylnitrosamino)-1-(1-oxido-3-pyridinyl)-1-butanone	Blasticidin S	3-O-Methylisoproterenol	Ganglioside GM2 (d18:0/16:0)	Cyproterone	4,4'-Methylene bis(2-methylaniline)		BILA 2185BS
4-(Methylnitrosamino)-1-(3-pyridyl)-1-butanol	Boc-Phe(NMe)-Pro-Phe(NMe)-Gly-OMe	3-O-Methylniveusin A	Ganoderic acid H	Cys His	4-[(2-Furanylmethyl)thio]-2-pentanone		Bismurrayafoline E
4-(tert-butyl)phenyl benzoate	Bouillonamide A	3-O-Methylrimiterol glucuronide	GlcCer(d14:1/18:0)	Cytochalasin E	4-Acetamido-2-amino-6-nitrotoluene		BIX01294
4,4'-Bis(dimethylamino)benzophenone	Bruceantinol	3-Oxa-9-azoniatricyclo[3.3.1.02,4]nonane, 9-ethyl-7-hydroxy-9-methyl-	GlcCer(d16:1(4E)/22:0(2OH))	DAPT	4-Acetyl-6-tert-butyl-1,1-dimethylindane		Bleekerine
4,5,6,7-Tetrachloro-2-trifluoromethylbenzimidazole	Bryodulcosigenin	3-oxohexacosanoic acid	Gln Gln Gln	Darunavir	4a-Peroxy-tetrahydrobiopterin		Borreverine
4,5'-Dimethylangelicin	Bupirimate	3-oxo-tricosanoic acid	Gln Met Ala	dATP	4-chloro-α-Cyanocinnamic Acid		Boscalid
4,6-heptadienal	Bupivacaine	3'-Prenylrubranine	Gln Thr Arg	d-Dethiobiotin	4E-Undecene-6,8,10-triynoic acid		Bromacil
4-[[4-(4-fluorophenyl)-3-piperidinyl]methoxy]-2-methoxy-, hydrogen sulfate (ester), (3S-trans)-Pheno	Buspirone	3-Sulfocatechol	Glu Arg Val	Deacetylspironolactone	4-Fluorocyclohexadiene-cis,cis-1,2-diol		Broussonin C
4-[[5-(acetylamino)-1-methyl-1H-indol-3-yl]methyl]-3-methoxy-N-[(2-methylphenyl)sulfonyl]-Benzamide	Butachlor	3-Thiophenemethanol	Glu Pro Trp	Debenzoylzucchini factor B	4-Guanidino-1-butanol		Bufotalin
4-Acetyl-2-prenylphenol glucoside	Butyl 3-O-caffeoylquinate	3-Vinylbacteriochlorophyllide d	Glucoheptonic acid	Decachlorobiphenyl	4-hydroxy Nonenal Mercapturic Acid		Buprenorphine
4alpha-methyl-5alpha-cholestan-3beta-ol	Calomelanol H	3Z,6Z,9Z-Tricosatriene	Glucosaminic acid	Deethylatrazine	4-hydroxy Nonenal Mercapturic Acid-d3		Bupropion
4-Aminoethylbenzenesulfonyl Fluoride	Calomelanol J	4-(2-Furanyl)-3-buten-2-one	Glucosylceramide (d18:1/12:0)	Delphinidin 3-(6-p-coumaroylglucoside)-5-[6-(malonyl)-4-(rhamnosyl)glucoside)]	4-hydroxy Nonenal-d3		Butyl 3'-O-butanoyl-4,6,4'-tri-O-(2-methylpropanoyl)-neohesperidoside
4-Carboxy-2-hydroxymuconate semialdehyde	Capsorubinidione	4-(2-Nitroethyl)phenyl primeveroside	Glycinoprenol-9	Delphinidin 3-glucoside-7,3'-di-(6-(E)-sinapoylglucoside)	4-Hydroxy-4-(3-pyridyl)-butanoic acid		Butyl isopropyl disulfide
4-Chloro-17alpha-methyl-17beta-hydroxy-4-androsten-3-one	Captafol	4-(L-Alanin-3-yl)-2-hydroxy-cis,cis-muconate 6-semialdehyde	Glycosminine	Deoxystreptomycin	4-Hydroxybenzyl isothiocyanate		C.I. Food Brown 3
4-Chloro-alpha-[4-[2-(diethylamino)ethoxy]phenyl]-alpha-phenylbenzeneethanol	Carbamorph	4,5,6,7-Tetrachloro-2-trifluoromethylbenzimidazole	Glycyl-Glutamine	Descinolone acetonide	4-Hydroxycitrulline		C16-OH Sulfatide
4-Hydroxy-16,18-tritriacontanedione	Cartilagineal	4,5-Dihydroniveusin A	Goshonoside F6	Desethyleneciprofloxacin	4-Hydroxyoxprenolol		C19 Sphingosine-1-phosphate
4'-Hydroxyflurbiprofen	Carvedilol(p-Hydroxy)	4,5'-Dimethylangelicin	Granisetron metabolite 3 glucuronide	Desmethylloperamide	4-Hydroxyoxprenolol glucuronide		C27:1n-7
4'-Hydroxyminoxidil	CAY10441	4-[(2-Furanylmethyl)thio]-2-pentanone	Halofantrine	Desmethylranitidine	4-keto myristic acid		C30 Monocyclic highly branched isoprenoid
4-Hydroxyphenylacetonitrile triacetylrhamnoside	CAY10443	4-[[4-(4-fluorophenyl)-3-piperidinyl]methoxy]-2-methoxy-, hydrogen sulfate (ester), (3S-trans)-Pheno	Haplophytine	DG(16:0/0:0/16:0) (d5)	4-Methyl-2-propyloxazole		C8-Dihydroceramide
4-Hydroxypropranolol glucuronide	CAY10464	4-[[5-(acetylamino)-1-methyl-1H-indol-3-yl]methyl]-3-methoxy-N-[(2-methylphenyl)sulfonyl]-Benzamide	Hebevinoside VII	DG(17:0/0:0/17:0) (d5)	4'-Methyl-alpha-pyrrolidinopropiophenone		Cafenstrole
4-Isopropenyl-2-oxy-cyclohexanecarboxyl-CoA	CAY10565	4-Acetamido-2-amino-6-nitrotoluene	Hericenone H	DG(17:0/18:0/0:0)[iso2]	4-Nitrobiphenyl		Caloxanthin sulfate
4-Mercaptobutyl glucosinolate	CAY10575	4alpha-methyl-5alpha-cholestan-3beta-ol	Hexadecanal-d5	DG(18:1(9Z)/15:0/0:0)	4-O-alpha-D-Galactopyranosylcalystegine B2		campest-4-en-3beta-ol
4-Methyldibenzothiophene	CAY10576	4-Carboxy-2-hydroxymuconate semialdehyde	hexadecanedioic acid mono-L-carnitine ester	DG(18:3(6Z,9Z,12Z)/18:1(11Z)/0:0)	4-Octen-3-one		Canavalioside
4-Methylene-L-glutamate	CAY10589	4-chloro-α-Cyanocinnamic Acid	hexyl octadecanoate	DG(18:4(6Z,9Z,12Z,15Z)/18:4(6Z,9Z,12Z,15Z)/0:0)	4'-O-Demethylrebeccamycin		Carapanaubine
4-Oxo-norfloxacin	CDP-1L-myo-inositol	4-Fluorocyclohexadiene-cis,cis-1,2-diol	Himbacine	DG(19:0/20:4(5Z,8Z,11Z,14Z)/0:0)[iso2]	4-Pyridinol, 2-[[[5-(difluoromethoxy)-1H-benzimidazol-2-yl]sulfinyl]methyl]-3-methoxy-		Carapin-8 (9)-Ene
4-Phenylbutyl glucosinolate	CDP-4-dehydro-3,6-dideoxy-D-glucose	4-Guanidino-1-butanol	Hirsutidin 3-glucoside	DG(20:2(11Z,14Z)/18:1(11Z)/0:0)	5-(2'-Carboxyethyl)-4,6-Dihydroxypicolinate		Carbendazim
5-(1-Propynyl)-5'-vinyl-2,2'-bithiophene	Ceanothine B	4H-Pyrido[1,2-a]pyrimidin-4-one, 3-ethyl-6,7,8,9-tetrahydro-2-methyl-	His His Thr	DG(20:2(11Z,14Z)/20:3(8Z,11Z,14Z)/0:0)[iso2]	5-(3,4-Dihydroxy-1,5-cyclohexadien-1-yl)-5-ethylbarbituric acid		Carboxyterbinafine
5,7,2',3',4'-Pentahydroxy-3,6-dimethoxyflavone 7-glucoside	Cefmetazole	4-hydroxy Nonenal Mercapturic Acid	Histidinyl-Aspartate	DG(20:5(5Z,8Z,11Z,14Z,17Z)/0:0/20:5(5Z,8Z,11Z,14Z,17Z)) (d5)	5'-(3',4'-dihydroxyphenyl)-gamma-valerolactone glucuronide		Carisoprodol
5,7,4'-Trihydroxy-3,6,8,3'-tetramethoxyflavone	Ceftibuten	4-hydroxy Nonenal Mercapturic Acid-d3	Hordatine A glucoside	DG(24:0/22:1(13Z)/0:0)	5-(Methylthio)-2-[(methylthio)methyl]-2-pentenal		Carmabin A
5a,6a-Epoxy-7E-megastigmene-3a,9e-diol 3-glucoside	Cer(d18:0/15:0)	4-hydroxy Nonenal-d3	Hovenidulcioside A2	D-Glucono-1,5-lactone 6-phosphate	5,10-Methylene-H4SPT		Carmamycin B
5-Aminoimidazole ribonucleotide	Cer(d18:0/h17:0)	4'-Hydroxy-4-(4-hydroxystyryl)-7-methoxyflavan	Huperzine B	Diaziquone	5,6-Dihydro-11-methoxyyangonin		CAY10510
5-Chloroindole-2-Carboxylic Acid	Cer(d18:1/14:0)	4-Hydroxycitrulline	Hydroxysaquinavir M2	Dichloroacetate	5,6-Dihydrouridine		CAY10598
5-Fluorouridine	Cer(d18:1/19:0)	4'-Hydroxyflurbiprofen	Hydroxysintaxanthin 5,6-epoxide	Didesmethyltrimeprazine	5-Acetylamino-6-amino-3-methyluracil		CE(18:3(6Z,9Z,12Z))
5-Hepten-3-yn-1-ol, 2,2-dimethyl-7-[methyl(1-naphthalenylmethyl)amino]-, (E)- glucuronide	Cer(t18:0/16:0(2OH))	4-Hydroxyoxprenolol	Hydroxystenozole	Dihydromenaquinone-8	5-Amino-6-(4-hydroxy-2-butenoyl)-2,2-dimethyl-4-chromanone		Cefovecin
5-Hexenyl glucosinolate	Cer(t18:0/18:0(2OH))	4-Hydroxypropranolol glucuronide	Hydroxytolbutamide	Dihydromenaquinone-9	5-Aminosalicylic Acid		Celecoxib
5-Hydroxylansoprazole sulfone	Cer(t20:0/26:0(2OH))	4-Isopropenyl-2-oxy-cyclohexanecarboxyl-CoA	Hymenocardine	Dimethenamid	5'-Dehydroadenosine		Cer(d14:1(4E)/20:0(2OH))
5-Hydroxysulfapyridine	Ceramide (d18:1/12:0)	4-Mercaptobutyl glucosinolate	Idanpramine	Dinitolmide	5'-Guanylylmethylenebisphosphonate		Cer(d14:1/22:0)
5-iodo-4-hydroxy-docosa-7Z,10Z,13Z,16Z,19Z-pentaenoic acid delta lactone	Cerivastatin	4-Methyl-2-propyloxazole	imidapril	Dioscoretine	5-Hydroxy-6-desmethylprimaquine		Cer(d18:0/14:0)
5-Methoxyindoleacetate	CerP(d18:1/16:0)	4-Methyl-3-heptyl linoleate	Ipconazole	Dirithromycin	5-Hydroxy-L-tryptophan		Cer(d18:0/16:0)
5-Methyl-2,5-di-1-pyrrolidinyl-2-cyclopenten-1-one	Cetraxate benzyl ester	4-Methylene-L-glutamate	Ipecac (Emetine)	DMABA-d4 NHS ester	5-Hydroxypropafenone		Cer(d18:0/17:0)
5-Methyl-2-phenyl-2-hexenal	Chaulmosulfone	4-Nitrobiphenyl	Isononane	Dmp 323	5-Hydroxypyrazinamide		Cer(d18:0/22:0(2OH))
5-Methylcytidine	Chloralose	4-O-alpha-D-Galactopyranosylcalystegine B2	Isoorientin 4'-O-glucoside-2''-(4-glucosyloxy-2,5-dihydroxycinnamante)	DMPP	5-Methyl-5-pentacosanol		Cer(d18:0/23:0)
5-Methyldeoxycytidine	Chlordane	4-Pyridinol, 2-[[[5-(difluoromethoxy)-1H-benzimidazol-2-yl]sulfinyl]methyl]-3-methoxy-	Isopropyl β-D-ThiogalactoPyranoside	D-NMAPPD	5-Methylheptan-2-one		Cer(d18:1/24:1(15Z))
5-Methyl-THF	Chlorothiazide	5'-(3',4'-dihydroxyphenyl)-gamma-valerolactone glucuronide	Isorhamnetin 7-alpha-D-Glucosamine	DNOC	5-Nitrofurfural		Cer(t18:0/16:0)
5-Nitro-ortho-anisidine	Chlorotrianisene	5,6-Dihydrouridine	IU1	Docosanamide	5-O-(1-Carboxyvinyl)-3-phosphoshikimate		Ceramide (d18:1/24:0)
5-O-(Indol-3-ylacetyl-myo-inositol) D-galactoside	Chlorzoxazone	5,7,2',3',4'-Pentahydroxy-3,6-dimethoxyflavone 7-glucoside	Ivermectin B1b	Dolichoic acid-[18-20]	5-Pentyloxazole		CerP(d18:1/14:0)
5'-O-Desmethyl omeprazole	Cholesteryl 11-hydroperoxy-eicosatetraenoate	5,7,4'-Trihydroxy-3,6,8,3'-tetramethoxyflavone	Jamaicamide C	Dolichol-18	5'-S-Methyl-5'-thioinosine		CerP(d18:1/24:1(15Z))
5'-Oxoinosine	Ciclesonide	5-Acetylamino-6-amino-3-methyluracil	Junosine	Dolichol-19	5β-Cholestane-2β,3α,7α,12α,26,27-hexol		Cevadine
5β-Cyprinolsulfate	cis-3-(6-Hydroxy-7-methoxy-5-benzofuranyl)acrylic acid glucuronide	5-Amino-6-(4-hydroxy-2-butenoyl)-2,2-dimethyl-4-chromanone	JWH 073 7-hydroxyindole metabolite-d7	Dolichyl b-D-glucosyl phosphate	5β-Cholestane-3α,7α,12α,22-tetrol		Chaksine
6-(2-Carboxyethyl)-7-hydroxy-2,2-dimethyl-4-chromanone glucoside	Citalopram aldehyde	5-Aminosalicylic Acid	JWH147	Dopamine glucuronide	5-δ-Hydroxybutyl Hydantoin		Chalepensin
6,6'-(1,2-phenylene)bis(1,3,5-triazine-2,4-diamine)	CL(20:4(8Z,11Z,14Z,17Z)/20:1(11Z)/18:2(9Z,12Z)/18:2(9Z,12Z))	5-Hepten-3-yn-1-ol, 2,2-dimethyl-7-[methyl(1-naphthalenylmethyl)amino]-, (E)- glucuronide	Kaempferol 7-methyl ether 3-(6-(E)-3,5-dimethoxy-4-hydroxycinnamoylglucosyl)-(1->2)-[rhamnosyl-(1->6)-glucoside]	dTDP-β-L-daunosamine	6-(2-CHLORO-5-(TRIFLUOROMETHYL)PHENYL)-1-PHENYL-2-THIOBIUREA		Chinomethionat
6,8a-Seco-6,8a-deoxy-5-oxoavermectin ''2a'' aglycone	Clenbuterol	5-Hydroxy-2-oxo-4-ureido-2,5-dihydro-1H-imidazole-5-carboxylate	Ketamine metabolite (Cyclohexanone, 2-(2-chlorophenyl)-6-hydroxy-2-(methylamino)-)	DU-6859	6,8-Dihydroxypurine		Chloromethiuron
6-Acetyl-D-glucose	Clindamycin	5-Hydroxy-6-desmethylprimaquine	ketophenylbutazone	Dulcoside A	6,9-difluoro-11-hydroxy-16-methyl-3-oxo-17-(1-oxopropoxy)-, (6b,11b,16b,17a)-Androsta-1,4-diene-17-c		Chloroprocaine
6alpha-Chloro-17-acetoxyprogesterone	Clobetasol propionate	5-Hydroxylansoprazole sulfone	Kolaflavanone	Egregiachloride A	6b,11b,16a,17a,21-Pentahydroxypregna-1,4-diene-3,20-dione 16,17-acetonide		chlorovulone I
6alpha-Fluoro-17-hydroxypregn-4-ene-3,20-dione acetate	Colupox b	5-Hydroxypropafenone	Kolanone	Elaeokanine C	6b-Angeloyl-3b,8b,9b-trihydroxy-7(11)-eremophilen-12,8-olide		cholesteryl beta-D-glucoside
6'-Apiosyllotaustralin	Conivaptan	5-Hydroxypyrazinamide	L-(+)-Arabinose	Emopamil	6-bromo-heneicosa-5E,9Z-dienoic acid		Chondrillasterol 3-[glucosyl-(1->4)-glucoside]
6beta-Fluoro-5alpha-hydroxypregnane-3,20-dione	Corynomycolic acid	5-Hydroxysulfapyridine	Labriformidin	Enterocin 900	6'''-Deamino-6'''-dehydro-6'''-oxoneomycin C		Cilastatin
6-bromo-docosa-5E,9Z-dienoic acid	Cotinineglucuronide	5-iodo-4-hydroxy-docosa-7Z,10Z,13Z,16Z,19Z-pentaenoic acid delta lactone	Lansiumamide B	Ephedrannin A	6-Deoxocastasterone		Cinegalline
6-Feruloylglucose 2,3,4-trihydroxy-3-methylbutylglycoside	Cotylenin F	5-Methoxyindoleacetate	Latanoprost (free acid)-d4	Epigallocatechin 3,3',-di-O-gallate	6-Epi-7-isocucurbic acid glucoside		Cinncassiol D2 glucoside
6-Heptenyl glucosinolate	Crinasiadine	5-Methyl-5-pentacosanol	Leu Ala Asp	epi-Tumonoic Acid D	6'-Epipravastatin		cis- and trans-L-Mercapto-p-menthan-3-one
6-HydroxyKetanserin	Cucurbitacin A	5-Methyldeoxycytidine	Leu Ala Ile	Epivoacorine	6-Geranylgeranyl 8'-methyl 6,8'-diapocarotene-6,8'-dioate		Citalopram-N-Oxide
6-Methyl-2-methylene-6-octene-1,3,8-triol	Cyanidin 3-(6''-sinapylsophoroside)-5-glucoside	5-Methylheptan-2-one	Leu Thr Asp	Epomusenin B	6-Hydroxy Doxazosin		Citranaxanthin
6-Methyloctan-3-ol	Cyanotriphenylborate	5-Nitrofurfural	Lex-lactose	EPTC	6-Hydroxycyanidin 3-glucoside		Clupanodonyl carnitine
6-O-Acetylarbutin	Cyclic-3,20-bis(1,2-ethanediyl acetal)-11alpha-(acetyloxy)-5alpha,6alpha-epoxypregnane-3,20-dione	5-Nitro-ortho-anisidine	LH 21	Ergostane skeleton	6-Hydroxydexamethasone		Coenzyme F430
6β-Hydroxyprednisolone	Cys His	5-O-(1-Carboxyvinyl)-3-phosphoshikimate	Limonoate D-ring-lactone	Erythrodiol 3-palmitate	6-Hydroxyenterodiol		Cohibin C
6β-Testosterone Enanthate	Cys-Asp-Pro-Gly-Tyr-Ile-Gly-Ser-Arg	5'-O-Desmethyl omeprazole	Lincomycin	Estra-1,3,5(10),16-tetraen-3-ol benzoate	6-Hydroxyfluvastatin		Coixenolide
7-(Acetyloxy)-3-(3-pyridinyl)-2H-1-benzopyran-2-one	D-4'-Phosphopantothenate	5-Pentyloxazole	Linoleic Acid-biotin	Ethyldimethylaminopropyl Carbodiimide	6-Hydroxykaempferol 7,4'-dimethyl ether 3-sulfate		Compound II(R/S)
7,12-Dimethylbenz[a]anthracene	DAT(16:0/21:0(2Me[S],3OH[S],4Me[S],6Me[S]))	5'-S-Methyl-5'-thioinosine	Linoleyl stearate	Euchretin B	6-Hydroxykynurenate		Correolide
7',8'-Dihydro-8'-hydroxycitraniaxanthin	Datiscetin	5α-Pregnane-3α,20α-diol	Lyciumoside VIII	Eugenol O-[a-L-Arabinofuranosyl-(1->6)-b-D-glucopyranoside]	6-Hydroxypentadecanedioic acid		Cortisol 21-acetate
7-Deshydroxypyrogallin-4-Carboxylic Acid	Deacetylcephalosporin C	5β-Cholestane-2β,3α,7α,12α,26,27-hexol	Lycoperdic acid	Eujambin	6-N,4-diphenyl-1,4-dihydro-1,3,5-triazine-2,6-diamine		Costatol
7-Desmethylprazosin	Deacetylipecoside	5β-Cholestane-3α,7α,12α,24,25-pentol	Lycorenine	Eupachlorin	6-Thiouric acid		Costatone
7-Geranylformononetin	Deacetyl-O-demethyldiltiazem	6-(2-Carboxyethyl)-7-hydroxy-2,2-dimethyl-4-chromanone glucoside	Lys Gln Val	Everninomycin	6α-Hydroxycampestanol		Culinariside
7-Hydroxy-5,4'-dimethoxy-8-methylisoflavone 7-O-rhamnoside	Deacetylspironolactone	6-(2-CHLORO-5-(TRIFLUOROMETHYL)PHENYL)-1-PHENYL-2-THIOBIUREA	Lys Glu Cys	Fasciculic acid B	7,8-DiHDPE		Cuscutic resinoside A
7-hydroxycoumarinyl-γ-Linolenate	Debromohymenialdisine	6,8a-Seco-6,8a-deoxy-5-oxoavermectin ''2a'' aglycone	Lys Met Pro	Fenchlorazole-ethyl	7,8-Dihydro-3b,6a-dihydroxy-alpha-ionol 9-[apiosyl-(1->6)-glucoside]		Cyanidin 3-O-[2-O-(6-O-(trans-3-O-(beta-D-glucopyranosyl)caffeyl)-beta-D-glucopyranosyl)-6-O-(trans-caffeyl)-beta-D-glucopyranoside]-5-O-[beta-D-glucopyranoside]
7-Hydroxydehydroglaucine	Deepoxysalmoxanthin	6,8-Dihydroxypurine	Lys Val Asp	Fenchlorphos	7',8'-Dihydro-8'-hydroxyreticulataxanthin		Cyclohexyl butanoate
7-Hydroxyriluzole glucuronide	Dehydrocarpaine II	6,9-difluoro-11-hydroxy-16-methyl-3-oxo-17-(1-oxopropoxy)-, (6b,11b,16b,17a)-Androsta-1,4-diene-17-c	Lys-Gln-Ala-Gly-Asp-Val	Feruloyl-beta-sitosterol	7,8-Dihydromethanopterin		Cyclolinopeptide A
7-Methyl-3-methylene-1,6,7-octanetriol	Delphinidin 3-(2''-galloylgalactoside)	6-Acetyl-D-glucose	LysoPE(24:1(15Z)/0:0)	Finaconitine	7-Hydroxyethyltheophylline		Cyclopassifloside III
7-methyl-6-oxo-octanoic acid	Delphinidin 3-(2-xylosylgalactoside)-5-glucoside	6alpha-Chloro-17-acetoxyprogesterone	Lyxosylamine	Finasteride	7-Hydroxyprochlorperazine		Cyclopassifloside X
7-Methylxanthosine	Delphinidin 3-O-beta-D-(6-O-(E)-p-coumaryl)galactopyranoside	6alpha-Fluoro-17-hydroxypregn-4-ene-3,20-dione acetate	Mahanimbinol	Flavidulol C	7-Methoxy-6-methyl-2H-1-benzopyran-2-one		Cyclopentolate
7-Oxosteroid	Demecarium	6b,11b,16a,17a,21-Pentahydroxypregna-1,4-diene-3,20-dione 16,17-acetonide	Malhamensilipin A	Fleroxacin	7-Methylinosine		Cycloxydim
7Z,9Z-Heptadecadiene	D-Erythrose	6'''-Deamino-6'''-dehydro-6'''-oxoneomycin C	Malonylcarnitine	Flunarizine	7-Methylthioheptanaldoxime		Cyenopyrafen
8-Allyl-2-phenyl-8H-1,3a,8-triaza-cyclopenta[a]indene	Descinolone acetonide	6-Geranylgeranyl 8'-methyl 6,8'-diapocarotene-6,8'-dioate	Malyngamide C acetate	Fluoxetine	7-O-Methyllicoricidin		Cyflumetofen
8-Deoxy-11-hydroxy-13-chlorogrosheimin	DG(12:0/17:2(9Z,12Z)/0:0)[iso2]	6-Hydroxy Doxazosin	MAM-2201	FMC-6(d18:1/24:0(2-OH))	7-Sulfocholyltaurine		Cys Thr Thr
8-Hydroxycarteolol	DG(13:0/13:0/0:0)	6-Methyloctan-3-ol	MAM2201 N-(4-hydroxypentyl) metabolite	Formylfusarochromanone	7α-(Thiomethyl)spironolactone sulfoxide		Cytochalasin Ppho
8-hydroxymianserin glucuronide	DG(20:1(11Z)/14:0/0:0)	6-O-Acetylarbutin	Meclizine	FTY720 (R)-Phosphate	8,9,10,11-Tetrafluoro-8E,10E-dodecadien-1-ol		D-Abequosyl-D-mannosyl-rhamnosyl-D-galactose-1-diphospholipid
8-Hydroxynevirapine	DG(20:3(8Z,11Z,14Z)/16:0/0:0)	6-Thiouric acid	Melledonal B	FTY720 phenoxy-biotin	8,9-dihydroxy stearic acid		Decaprenyl phosphate
8-iso Prostaglandin A2-biotin	DG(20:4(5Z,8Z,11Z,14Z)/0:0/20:4(5Z,8Z,11Z,14Z)) (d5)	7,12-Dimethylbenz[a]anthracene	Melleolide K	Fuca(1-2)Galb(1-4)GlcNAcb(1-3)Galb(1-4)GlcNAcb(1-3)Galb(1-4)GlcNAcb-Sp	8-Bromoadenosine		Deferoxamine
8-Prenyllepidissipyrone	DG(21:0/22:2(13Z,16Z)/0:0)[iso2]	7,8-Diaminononanoate	Mesoporphyrin IX	Fumonisin C2	8-C-Prenyl-6'',6''-dimethylpyrano[2'',3'':7,6]flavanone		Dehydromillettone
8Z-Pentadecen-2-one	DG(22:5(7Z,10Z,13Z,16Z,19Z)/15:0/0:0)	7',8'-Dihydro-8'-hydroxycitraniaxanthin	Met Gln Arg	Furmecyclox	8-Epiiridodial glucoside tetraacetate		Delphinidin 3-O-(2''-O-galloyl-6''-O-acetyl-beta-galactopyranoside)
9,9-dibromo-8-nonenoic acid	DG(22:6(4Z,7Z,10Z,13Z,16Z,19Z)/20:2(11Z,14Z)/0:0)	7',8'-Dihydro-8'-hydroxyreticulataxanthin	Met Gln Lys	Fusicoccin A	8-Hydroxy-3-chlorodibenzofuran		Demethylphosphinothricin
9alpha-Fluoro-11beta-hydroxy-6alpha-methylpregn-4-ene-3,20-dione	DG(24:1(15Z)/22:2(13Z,16Z)/0:0)	7,8-Dihydromethanopterin	Met Lys Asp	Gadodiamide	8-Hydroxycarapinic Acid		Deoxystreptomycin
9-Hexadecenoylcholine	D-Glucono-1,5-lactone 6-phosphate	7alpha,8alpha-Dihydroxycalonectrin	Met-Arg-Phe-Ala acetate salt	Gadopentetate	8-Hydroxypinoresinol 8-glucoside		Descarbamoylnovobiocin
9Z,13-Tetradecadien-11-ynal	D-Glucosyldihydrosphingosine	7-Geranylformononetin	Methotrimeprazine	Galabiosylceramide (d18:1/25:0)	8R-hydroxy-nonanoic acid		Desethylene-N-acetylnorfloxacin
9Z-Tritriacontene	DGTA(18:1/22:4(10Z,13Z,16Z,19Z))	7-Hydroxydehydroglaucine	Methyl (3x,4E,10R)-3,10-dihydroxy-4,11-dodecadiene-6,8-diynoate 10-glucoside	Galactosyl 4-hydroxyproline	9,10-Dihydrokadsurenone		Desethyl-N-acetylprocainamide
A47934	DGTS(16:0/16:0)	7-Hydroxyethyltheophylline	methyl 13-sophorosyloxydocosanoate	Galalpha1-3Galalpha1-3Galbeta1-4Glcbeta-Cer(d18:1/20:0)	9,11alpha-epoxy-6alpha-acetoxy-cholest-7-en-3beta,5alpha,19-triol		Desmethyldehydroamlodipine
abrusoside A	Dhurrin	7-Hydroxyprochlorperazine	Methyl nomilinate 17-glucoside	Galbeta1-4(Fucalpha1-3)GlcNAcbeta1-3Galbeta1-4Glcbeta-Cer(d18:1/22:0)	9a-Fluoro-B-hydroxyandrosterone		Desmethylloperamide
Abu-Ile-OH	Diamidafos	7-Methylxanthosine	Methyldopa	GalCer(d18:0/16:0)	9-chloro-10-hydroxy-hexadecanoic acid		Desmethylnortriptyline glucuronide
Acanthifolicin	Dibucaine	7α-(Thiomethyl)spironolactone sulfoxide	Methylmibefradil Metabolite (Acetic acid, methoxy-, 6-fluoro-1,2,3,4-tetrahydro-2-[2-(methylamino)et	GalCer(d18:0/20:0)	9-deoxy-9-methylene-PGE2		Desmosine
Acebutolol	Dichlorophene	8,9,10,11-Tetrafluoro-8E,10E-dodecadien-1-ol	Minabeolide-3	GalCer(d18:0/22:0)	9-Fluoroprednisolone		DG(12:0/18:3(9Z,12Z,15Z)/0:0)[iso2]
Acetohexamide	Dictyoquinazol B	8-Acetyl-T2 tetrol	MIPC(d18:0/20:0(2OH))	Ganglioside GD2 (d18:0/12:0)	9-Hydroxy-2-nitrofluorene		DG(13:0/22:4(7Z,10Z,13Z,16Z)/0:0)[iso2]
Acetyl Podocarpic Acid Anhydride	Didesmethyltrimeprazine	8-Allyl-2-phenyl-8H-1,3a,8-triaza-cyclopenta[a]indene	MK 886	Genipin 1-beta-gentiobioside	9-Methylxanthine		DG(15:0/0:0/15:0) (d5)
Acetylaminodantrolene	Dieporeticenin	8-Bromoadenosine	MK-129	Geranylgeranylcysteine	9-Thiastearic Acid		DG(15:0/14:1(9Z)/0:0)
Acetylintermedine	Diethyl malonate	8-C-Prenyl-6'',6''-dimethylpyrano[2'',3'':7,6]flavanone	Momordin Ie	Gitoxigenin	A 922500		DG(15:1(9Z)/22:6(4Z,7Z,10Z,13Z,16Z,19Z)/0:0)[iso2]
Acidissiminin	Dihydroaceanthrylene	8-Deoxy-11-hydroxy-13-chlorogrosheimin	Moricizine sulfone	Glabrin D	a-[1-(diethylamino)ethyl]-p-hydroxy-Benzyl alcohol		DG(16:0/0:0/16:0) (d5)
Aconitine	Dihydrodeoxygedunin	8-Hydroxy-3-chlorodibenzofuran	Moschamine	GlcCer(d15:1/22:0)	a-[1-(ethylamino)ethyl]-p-hydroxy-Benzyl alcohol		DG(17:1(9Z)/22:6(4Z,7Z,10Z,13Z,16Z,19Z)/0:0)[iso2]
Acrifoline	Dihydroergotamine	8-Hydroxycarapinic Acid	Mucronine A	Glibornuride	AB005		DG(17:2(9Z,12Z)/22:4(7Z,10Z,13Z,16Z)/0:0)[iso2]
Acrimarine J	Dihydromenaquinone-9	8-Hydroxypinoresinol 8-glucoside	Mupirocin	Glimepiride	Abu-Met-OH		DG(18:1(9Z)/0:0/18:1(9Z)) (d5)
Acrimarine N	Dihydromilletenone methyl ether	8-iso Prostaglandin A2-biotin	Muricatin C	Gln Lys Tyr	Acarbose (component 2)		DG(18:1(9Z)/15:0/0:0)
Acrovestone	Dihydroptaeroxylin	8-Prenyllepidissipyrone	Mycinamicin II	Gln Phe Tyr	Acemetacin		DG(18:3(9Z,12Z,15Z)/15:0/0:0)
ACS 67	Dihydroxycarteolol M1	9,10-dichloro-octadecanoic acid	Mycolactone	Globomycin	Acenaphthenequinone		DG(18:4(6Z,9Z,12Z,15Z)/20:5(5Z,8Z,11Z,14Z,17Z)/0:0)
Actinamine	Diiodoacetic acid	9,11alpha-epoxy-6alpha-acetoxy-cholest-7-en-3beta,5alpha,19-triol	N-((4-chlorophenyl)carbamothioyl)benzamide	Glutathionylaminopropylcadaverine	Acetaldehyde diisoamyl acetal		DG(18:4(6Z,9Z,12Z,15Z)/22:6(4Z,7Z,10Z,13Z,16Z,19Z)/0:0)
Acutissimin A	Diisopropyl phosphate	9a-Fluoro-B-hydroxyandrosterone	N-(3-oxododecanoyl) homoserine lactone	Gly Glu Cys	Acetyldeoxynivalenol		DG(19:0/22:4(7Z,10Z,13Z,16Z)/0:0)[iso2]
Acutumidine	Dimepiperate	9alpha-Fluoro-11beta-hydroxy-6alpha-methylpregn-4-ene-3,20-dione	N-(furan-2-ylmethyl)-1H-pyrazolo[3,4-d]pyrimidin-4-amine	Gly His Val	Acremoauxin A		DG(20:3(5Z,8Z,11Z)/18:3(9Z,12Z,15Z)/0:0)
Adenosyl cobyrinic acid a,c diamide	Dimethipin	9-Chloro-17beta-hydroxy-17-methylandrost-4-ene-3,11-dione	N1,N10-Diferuloylspermidine	Gly Phe Trp	Acyclovir (8-hydroxy-9-(2-hydroxythoxymethyl)guanine		DG(20:5(5Z,8Z,11Z,14Z,17Z)/0:0/20:5(5Z,8Z,11Z,14Z,17Z)) (d5)
ADMA	Dinitrosopentamethylenetetramine	9-Hydroxy-2-nitrofluorene	N1,N1-dimethyl-4-[[4-(dimethylamino)phenyl](4-nitrophenyl)methyl]aniline	Gly Phe Val	Adenosine 5-O-(3-thiotriphophate)		DG(20:5(5Z,8Z,11Z,14Z,17Z)/18:3(6Z,9Z,12Z)/0:0)
adonitoxin	dinor-12-oxo Phytodienoic Acid-d5	9-Methylxanthine	N2'-Acetylgentamicin C1a	Glycerol 1,3-dihexadecanoate	Adlupone		DG(22:1(13Z)/15:0/0:0)
Aerophobin 2	Dioscoretine	9-O-Acetylneuraminic acid	N3-Metyladenine	Glycerol triundecanoate	Adouetine X		DG(22:2(13Z,16Z)/14:0/0:0)
Agavoside B	Diphenylmethylphosphine oxide	9-Thiastearic Acid	N-acetyl-2-carboxy Benzenesulfonamide	Gnidicin	Adouetine Z		DG(22:2(13Z,16Z)/20:4(5Z,8Z,11Z,14Z)/0:0)
Akuammine	Diphenylphosphine isopropyl ester	a-[1-(ethylamino)ethyl]-p-hydroxy-Benzyl alcohol	N-Acetylanthranilate	Goshonoside F4	Aerobactin		DG(22:6(4Z,7Z,10Z,13Z,16Z,19Z)/18:3(9Z,12Z,15Z)/0:0)
Ala Gln Gln	Dipiperamide A	abrusoside A	N-Acetyl-leucyl-leucine	Gossypetin 7,8-dimethyl ether 3,3'-disulfate	Aflatoxin B1exo-8,9-epoxide-GSH		DG(22:6(4Z,7Z,10Z,13Z,16Z,19Z)/22:5(7Z,10Z,13Z,16Z,19Z)/0:0)
Ala Ile	Dipiperamide C	Abu-Met-OH	N-Acetyl-leu-leu-leu-leu-leu-tyr-amide	Gossypetin 8-glucoside 3-sulfate	AG-041R		Di-2-propenyl pentasulfide
Ala Lys Pro	Disophenol	Acanthifolicin	N-Acetyl-leu-leu-tyr	Goyaglycoside c	AG-1296		Diasarone 2
Ala-Nap-OH	di-trans,poly-cis-undecaprenyl diphosphate	Acarbose (component 2)	Nalbuphine-6-glucuronide	GTP-gamma-S	Agavegenin A		Dibenz[a,h]acridine
Alanylclavam	Dolichoic acid-[18-20]	Acebutolol	Naled	Guanethidine	Agelasine		Difethialone
Ala-Ser-OH	Dolichyl b-D-glucosyl phosphate	Acemetacin	Narwedine	Hericenone F	Aginoside progenin		Diguanosine diphosphate
Ala-Trp-OH	D-Pantetheine 4'-phosphate	Acenaphthenequinone	Nb-Tricosanoyltryptamine	Hexadecanoic acid, 16-fluoro-; 16-Fluoropalmitic acid	AGK2		Dihydrochelirubine
Albafuran B	Dulciol A	Acetaldehyde diisoamyl acetal	N-cis-octadec-9Z-enoyl-L-Homoserine lactone	His Arg	AL 8810 ethyl amide		Dihydroergocornine
Alendronic acid	Dyphylline	Acetohexamide	N-Desmethylzafirlukast	His Asn His	AL 8810 isopropyl ester		Dihydroergocristine
a-L-Fucopyranosyl-(1->2)-b-D-galactopyranosyl-(1->2)-D-xylose	ecdysone palmitate	Acetophenazine	N-docosahexaenoyl histidine	His Val His	AL 8810 methyl ester		Dihydrogeranylgeranyl diphosphate
all-trans-Carophyll yellow	Eduline	Acetyl Podocarpic Acid Anhydride	Nebramycin factor 5'	His Val Ser	AL-294		Dihydroretrofractamide B
all-trans-retinyl linolate	Egregiachloride B	Acetylaminodantrolene	Nigericin	Homocystine	Ala Ala Arg		Dihydrospheroidene/ Methoxyneurosporene
Aloperine	Eletriptan	Acetyldeoxynivalenol	Nitro blue tetrazolium	Hovenidulcioside A1	Ala Gln Lys		Dihydrostreptomycin
alpha,alpha'-diethyl-4,4'-bis(2-propynyloxy)stilbene	Emodic Acid	Acetylintermedine	N-Oleoyl-D-erythro-Sphingosine (C18:1 Ceramide)	Hydrocortisone cypionate	Ala Phe Trp		Diltiazem
alpha-Antiarin	Emopamil	Aconitine	Notoginsenoside T2	Hydroxyanthraquinone	Alangimarine		Dimebolin
alpha-Chaconine	Enoxacin	Acrimarine J	N-palmitoyl glutamine	Hydroxydiphenoxylic acid(HDPA)	Alchornine		Dimethyl diselenide
Alpha-cyclodextrin	Epiruscogenin	Acrimarine N	N-stearoyl phenylalanine	Hydroxyphthioceranic acid (C36)	Aldosine		Diphemanil Methylsulfate
alpha-D-Galactopyranuronosyl-(1->4)-alpha-D-galactopyranuronosyl-(1->4)-D-galacturonic acid	Epitheaflavic acid 3'-gallate	Acrovestone	N-Succinimidyl [tris(2,4,6-trimethoxyphenyl)phosphonio]acetate	Hydroxyprolyl-Tryptophan	Alliosterol 1-rhamnoside 16-galactoside		Diphylloside C
alpha-Eucaine	Epomusenin B	ACS 67	Nylidrin	Hygromycin A	Allopurinol-1-ribonucleoside		Diprenorphine
Alpha-linolenyl carnitine	erythro-8,10-Hentriacontanediol	Acutissimin A	Nystatin A3	Hypoglycin B	Allosamidine		Dipropetryn
alpha-Santalyl phenylacetate	Erythrodiol 3-palmitate	Acyclovir (8-hydroxy-9-(2-hydroxythoxymethyl)guanine	Octadecanoic acid trichloroethyl ester	Hypusine	all-trans-Dehydroretinal		Dirithromycin
AM1235	Erythromycin B	Aerobactin	Octopamine (p-Hydroxyphenylethanolamine)	I-123 BMIPP	all-trans-heptaprenyl diphosphate		Disperse Blue 1
Amcinonide	Erythronolide B	AG-99	O-Desmethylcarvedilol	Idebenone Metabolite (QS-4)	alNAcbeta1-4(NeuGcalpha2-3)Galbeta1-4Glcbeta-Cer(d18:1/24:0)		Disperse Yellow 3
Aminofructose 6-phosphate	Eseroline	AGK2	OH-Chlorobactene	Ile Cys Gln	alpha-Acetolactate decarboxylase (enzyme preparation from bacillus subtilis recombinant)		DL-PPMP
Aminohippuric acid	Etaconazole	AL 8810 isopropyl ester	Oligomycin B	Indinavir	Altanserin		Docosahexaenoyl Glycine
Amiprilose	Ethyl sorbate	AL-321	Oligomycin C	Indinavir-N-glucuronide	AM1220		Dodeca-2(e),4(e)-dienoic acid isobutylamide
Amitenone	Eupachlorin	Ala Ala Trp	O-Methylganoderic acid O	Irisresorcinol	Ambenonium		dolichyl D-xylosyl phosphates
Amoricin	Eutypine	Ala Gln Gln	Ophiopogonin D	I-SAP	Ametryn		Donhexocin
Amoxicillin	Evodiamine	Ala Ile	Oseltamivir	Isopentyl gentiobioside	Amikacin		Doxefazepam
AMPA	Evoxine	Ala Lys Pro	PA(12:0/20:3(8Z,11Z,14Z))	Isoxeniaphyllenol	Aminopentol		DTP
Amphibine H	Exemestane	Alanylclavam	PA(16:0/13:0)	JP104	Ammeline		EAM2201
Amphotericin B	Fasciculol E	Ala-Ser-OH	PA(17:0/17:1(9Z))	Jujubasaponin VI	Amorolfine		Eflornithine
Amsacrine	Fenbuconazole	Ala-Trp-OH	PA(17:0/22:0)	JWH 200-d5	Ampalex		Egregiachloride C
Anacrotine	Fentin acetate	Alcuronium	PA(18:2(9Z,12Z)/18:2(9Z,12Z))[U]	Kanzonol S	Amphibine B		Eicosapentaenoyl Serotonin
Anandamide 0-phosphate	Flavidulol C	Aldosine	PA(20:1(11Z)/0:0)	KDdiA-PC	Anandamide (20:3, n-3)		Enalkiren
Anatibant	Fluenetil	Alendronic acid	PA(20:4(5Z,8Z,11Z,14Z)/18:0)	LacCer(d18:0/16:0)	Anantine		Enniatin B4
Angiotensin III	Fluprostenol isopropyl ester	a-L-Fucopyranosyl-(1->2)-b-D-galactopyranosyl-(1->2)-D-xylose	PA(20:5(5Z,8Z,11Z,14Z,17Z)/17:1(9Z))	Lasonolide A	Anapear		ent-Epipeltogynan-4alpha-ol
Anhydrotetracycline	Fluprostenol serinol amide	Aliskiren	PA(22:0/22:0)	Lauroyl-CoA	Androstenediol		Epothilone A
Anilazine	Flurogestone acetate	Allopurinol-1-ribonucleoside	PA(O-16:0/13:0)	L-Citronellol glucoside	Angolensic Acid, Methyl Ester		Epoxomicin
Antanapeptin C	Fluthiacet-methyl	Allosamidine	PA(O-18:0/22:4(7Z,10Z,13Z,16Z))	Leu Phe Cys	Anhalonidine		Epoxyanethole
Anthanthrene	Folic acid	all-trans-Carophyll yellow	PA(O-20:0/17:2(9Z,12Z))	Leu Pro Gly	Anhydroicaritin 3-rhamnosyl-(1->2)-rhamnoside		Ergocristine
Antibiotic X 14889A	Forasartan	all-trans-Dehydroretinal	PA(P-16:0/15:1(9Z))	Leucomycin A1	A-Nor-5alpha-cholestan-2-one		erythro-7,9-Hexatriacontanediol
Antibiotic X 14889C	Formylfusarochromanone	all-trans-retinyl linolate	PA(P-20:0/19:0)	Leucomycin A4	Antanapeptin B		Erythromycin D
Antibiotic X 14889D	Fortimicin AO	alpha,alpha'-diethyl-4,4'-bis(2-propynyloxy)stilbene	PAF C-16-d4	Limonene-1,2-epoxide	Antimycin A1		Ethoxzolamide
Antillatoxin B (red color)	Fosinopril	alpha-Acetolactate decarboxylase (enzyme preparation from bacillus subtilis recombinant)	Palmitoleyl linolenate	Linolenyl laurate	APGPR Enterostatin		Ethyl 3-(N-butylacetamido)propionate
Antimycin A (A1 Shown)	FTY720 phenoxy-biotin	alpha-Antiarin	Panatellin	LTB4-d4	Apigenin 7,4'-diglucuronide		Ethyl 3,3-diiodoacrylate
antioside	Galbeta1-4GlcNAcbeta1-3Galalpha1-3Galbeta1-4Glcbeta-Cer(d18:1/26:0)	Alpha-cyclodextrin	Panaxydol chlorohydrine	Lucidenic acid A	Aplidiasphingosine		ethyl-2,4-dimethyl-Thiazole-5-Carboxylate
Apigenin 7-(3''-acetyl-6''-E-p-coumaroylglucoside)	gamma-Coniceine	alpha-D-Galactopyranuronosyl-(1->4)-alpha-D-galactopyranuronosyl-(1->4)-D-galacturonic acid	Pandaroside A	Lusitanicoside	Aquayamycin		Eugenol O-[a-L-Arabinofuranosyl-(1->6)-b-D-glucopyranoside]
Apiosylglucosyl 4-hydroxybenzoate	Garcinone A	alpha-Eucaine	PAPA NONOate	Luteolin 7-sulfate-3'-rutinoside	Arachidonic Acid-biotin		Eugenyl Benzoate
Apramycin	Gelsedine	alpha-Santalyl phenylacetate	Paradisin C	LY223982	Arachidonoyl 2'-Chloroethylamide		Euphorbia factor Ti2
Arachidonic Acid methyl ester-d8	Gibberellin A7	Altanserin	Pazopanib	Lyciumin D	Arachidonoyl Serotonin		Evasterioside E
Arbekacin	Glaucarubolone 15-O-beta-D-glucopyranoside	AM1235	PC(10:0/17:0)[U]	Lys Asn Gly	Arachidonoyl-1-thio-Glycerol		Everolimus
Arbutin	GlcCer(d14:1/18:0)	Ambenonium	PC(16:0/9:0(COOH))	Lys Leu Ala	Arg Arg Pro		F-Amidine
Arg Arg His	GlcCer(d15:1/20:0)	amifloxacin	PC(16:1(9Z)/16:1(9Z))[U]	Lys Lys Gln	Arg Asn Asp		Faradiol myristate
Arg Arg Phe	GlcCer(d15:1/22:0)	Amikacin	PC(16:2(2E,4E)/16:2(2E,4E))	Lys Phe Val	Arg Asn Gly		Farnesoyl-CoA
Arg Asn Cys	GlcCer(d15:2(4E,6E)/18:0)	Aminopentol	PC(18:0/0:0)[S]	Lys Tyr Val	Arg Asp		Farnesyl Thiosalicylic Acid
Arg Asn His	GlcCer(d16:1(4E)/22:0(2OH))	Ammeline	PC(18:1(9E)/2:0)	LysoPC(14:0)	Arg Asp Trp		Fe(CN)3
Arg Asn Lys	Glibornuride M6a	Amoricin	PC(20:0/17:2(9Z,12Z))	LysoPE(0:0/20:0)	Arg Glu Arg		fecosteryl palmitoleate
Arg Asn Tyr	Gliclazide	AMPA	PC(20:3(5Z,8Z,11Z)/20:1(11Z))	Malyngamide I	Arg Glu Phe		Fenofibrate
Arg Asp Arg	Glimepiride	Ampalex	PC(22:2(13Z,16Z)/18:1(9Z))	Met Ile Leu	Arg Glu Pro		Feruloyldihydro-beta-sitosterol
Arg Cys Phe	Gln Glu Lys	Amphotericin B	PC(22:5(7Z,10Z,13Z,16Z,19Z)/22:2(13Z,16Z))	Metaflumizone	Arg Glu Trp		Filipin III
Arg Cys Pro	Gln Lys Tyr	Anacrotine	PC(9:0/10:0)[U]	Metaproterenol 3-O-sulfate	Arg Gly His		Flaccidin B
Arg Glu	Gln Phe Tyr	Anandamide 0-phosphate	PC-M6	Metconazole	Arg Gly Pro		Flavonol 3-O-[alpha-L-rhamnosyl-(1->6)-beta-D-glucoside]
Arg Ile Tyr	Glu Arg Val	Anatibant	p-Cresol glucuronide	Methional diethyl acetal	Arg His His		Fluconazole glucuronide
Arg Met Arg	Glu Gln Asp	Angiotensin III	PD 173074	Methyldopexamine sulfate	Arg His Lys		Flunarizine
Arg Met Met	Glu Val Glu	Anhydrotetracycline	PE(10:0/11:0)[U]	Methylmethionine sulfonium salt	Arg Lys		Flutolanil
Arjunolic acid 3-glucoside	Gly Asn Gly	Anthanthrene	PE(12:0/20:3(8Z,11Z,14Z))	Metsulfovax	Arg Lys Lys		Fortimicin FU-10
Armillane	Gly Asn Met	Antimycin A (A1 Shown)	PE(12:0/22:6(4Z,7Z,10Z,13Z,16Z,19Z))	Mezlocillin	Arg Lys Ser		Fosfosal
Artomunoxanthone	Gly His Phe	Antimycin A1	PE(17:2(9Z,12Z)/15:0)	Micrococcin	Arg Met Pro		Fructoselysine
Aryl beta-D-glucoside	Gly Lys Val	Apicidin	PE(19:0/26:0)[U]	Militarinone B	Arg Phe Pro		Fucalpha1-2Galbeta1-3GlcNAcbeta1-3Galbeta1-4Glcbeta-Cer(d18:1/24:0)
Ascorbalamic acid	Gly Phe Glu	Apigenin 7,4'-diglucuronide	PE(22:6(4Z,7Z,10Z,13Z,16Z,19Z)/20:4(5Z,8Z,11Z,14Z))	Minosaminomycin	Arg Phe Thr		Fumonisin B1
Asebotoxin II	Gly Phe Trp	Apiosylglucosyl 4-hydroxybenzoate	PE(24:0/22:2(13Z,16Z))	Mometasone Furoate	Arg Pro Thr		Fumonisin C2
Asn Asn Gly	Glycerol 1-propanoate diacetate	Aplidiasphingosine	PE(9:0/11:0)[U]	Monodehydroascorbate	Arg Ser		Fusicoccin H
Asn Asp Pro	Glycopyrrolate	Apramycin	PE(O-18:0/0:0)	Morfamquat	Arg Ser Trp		Gadoversetamide
Asn Gln Gln	Glycosminine	Aquayamycin	PE(O-20:0/22:2(13Z,16Z))	Morroniside	Arg Ser Val		Galalpha1-3Galalpha1-3Galalpha1-4Galbeta1-4Glcbeta-Cer(d18:1/24:0)
Asn Glu Ile	Glycyl-Glutamate	Arachidonic Acid methyl ester-d8	PE(P-16:0/22:1(13Z))	Mosinone A	Arg Val Arg		Galbeta1-3GalNAcbeta1-4(KDNalpha2-3)Galbeta1-4Glcbeta-Cer(d18:1/20:0)
Asn His Val	Guaiol acetate	Arachidonic Acid-biotin	PE-Cer(d14:1(4E)/22:1(13Z))	Mulberrofuran Q	Arg Val Val		Galbeta1-3GalNAcbeta1-4(NeuGcalpha2-3)Galbeta1-4Glcbeta-Cer(d18:1/18:0)
Asn Lys Ser	H-1152	Arachidonoyl-1-thio-Glycerol	PE-Cer(d14:1(4E)/24:1(15Z)(2OH))	Muridienin 1	Argiotoxin 636		GalCer(d18:0/16:0)
Asn-Abu-OH	Haloprogin	Arg Arg His	PE-Cer(d14:2(4E,6E)/21:0)	Muridienin 2	Armillatin		Gallic acid
Asn-Lys-OH	Harringtonine	Arg Asn Cys	PE-Cer(d15:2(4E,6E)/22:0(2OH))	Mycinamicin VI	Armillyl orsellinate		GalNAcbeta1-4(NeuAcalpha2-3)Galbeta1-4Glcbeta-Cer(d18:1/24:1(15Z))
Asp Arg Ala	HEPC	Arg Cys Phe	Pectenotoxin 2	Myricatin	Arnamiol		Gancaonin V
Asp Cys Cys	Heptadecanoyl Ethanolamide	Arg Cys Pro	Penciclovir	N-(2,4-Dinitrophenyl)-DL-methionine sulfoxide	Arsenocholine		Ganciclovir
Asp His Lys	Hericene A	Arg Glu	Penconazole	N-(2,5-Dihydroxyphenyl)pyridinium(1+)	Artesunate		Ganglioside GD2 (d18:0/12:0)
Asp Ser Trp	Hesperetin 7-O-rhamnoside	Arg His Lys	Penicillin K	N-(2R-Hydroxydocosanoyl)-2S-amino-1,3S,4R-octadecanetriol	Artoindonesianin A		GANT 61
Asparaginyl-Hydroxyproline	Hetacillin	Arg Lys	pentanamide	N-(α-Linolenoyl) Tyrosine	Artonin Q		Gardenoside
Aspidin	hexadecanedioic acid mono-L-carnitine ester	Arg Met Met	Pentoxazone	N1-(2,4-Dimethoxybenzyl)-n2-(2-(pyridin-2-yl) ethyl)oxalamide	Arvensan		Geissospermine
Aspulvinone H	hexamethylene bisacetamide	Arg Met Pro	Perflubron	N1-Acetylspermidine	Asn Asn Asp		Gestrinone
Atorvastatin	His Asn His	Arg Ser	Petalostetin	N-Acetyl-L-2-amino-6-oxopimelate	Asn Asn Gln		GlcCer(d14:1(4E)/24:1(15Z)(2OH))
Atracurium (Quaternary monoacrylate)	His Gly Asp	Arg Ser Trp	Petunidin 3-rutinoside	N-Acetyl-L-glutamic acid	Asn Asn His		GlcCer(d14:2(4E,6E)/18:0)
Atraton	His Lys Pro	Arg Val Arg	PG(13:0/22:4(7Z,10Z,13Z,16Z))	Nanchangmycin	Asn Lys Tyr		GlcCer(d18:2/20:1)
Auramine	His Met Val	Arjunolic acid 3-glucoside	PG(18:3(6Z,9Z,12Z)/14:0)	Nap-Leu-OH	Asn Phe Phe		Glicophenone
Auriculine	Homodihydrocapsaicin	Armillatin	PG(21:0/17:0)	Narasin	Asp Asp Arg		Gln Lys Thr
Austin	Honokiol	Arnamiol	PG(P-16:0/13:0)	Narbomycin	Asp Glu Lys		Glu Glu Ile
Austinol	Huratoxin	Arsenocholine	PG(P-16:0/16:1(9Z))	Nb-Arachidoyltryptamine	Asp Glu Phe		Glu Lys Lys
Avadharidine	Hycanthone	Artoindonesianin A	PG(P-16:0/17:2(9Z,12Z))	N-Carboxytocainide glucuronide	Asparagoside B		Glu Pro Trp
AV-Ceramide	Hydrogenobyrinate	Artomunoxanthone	PG(P-18:0/15:1(9Z))	N-Chloroacetyl-2,6-diethylaniline	Asp-Asn-OH		Glu Ser Asn
Avenalumin III	Hypoglycin B	Asebotoxin II	PG(P-20:0/0:0)	Nemonapride	Astaxanthin glucoside		Glu Thr
Avenestergenin B2	I-123 BMIPP	Asn Asn His	PGF2alpha-EA(d4)	Neoacrimarine F	Asticolorin A		Glucoconvallasaponin B
Avenic acid A	Idebenone Metabolite (QS-4)	Asn Asp Pro	Phaseolus e	N-ethyl N-(2-hydroxy-ethyl) arachidonoyl amine	Astragaloside III		Glucoheptonic acid
Avermectin A1a	Ile Cys Gln	Asn Gln Gln	Phe Glu Ser	Neu5Acα2-3[GalNAcβ1-4]Galβ1-4Glcβ-Sp	Asukamycin		Glucosylceramide (d18:1/12:0)
Avermectin A2a aglycone	Ile Trp Trp	Asn His Val	Phe Tyr Val	Neu5Acα2-3Galβ1-4[Fucα1-3]GlcNAcβ-Sp	Atazanavir		Glutathionylaminopropylcadaverine
Avermectin A2a monosaccharide	Ile-Met-OH	Asn Lys Ser	Phellatin	N-Formylnorfloxacin	ATB-343		Glutathionylspermidine
Axitinib	Indaconitine	Asn Lys Trp	Phenethyl rutinoside	Ngamma-Nitro-L-arginine	Austalide A		Gly Arg Ala
Azaspiracid 3	Inositol cyclic phosphate	Asn Lys Tyr	Phenisopham	N-hexanoyl-L-Homoserine lactone-d3	Austalide G		Gly His Val
Azatadine	Iopanoic acid	Asn Met Lys	Phenylacetic mustard	N-Hydroxy-4-aminobiphenyl	Avermectin A1b monosaccharide		Gly Leu Cys
Azinphos-ethyl	Ipecac (Protoemetine)	Asn Phe Phe	Phenylbutyrylglutamine	Nicardipine	Avermectin B1b monosaccharide		Gly Phe Val
Azoprocarbazine	Irbesartan	Asn-Lys-OH	Phenylenediamine	Nifuradene	Azaspiracid		Gly Thr Cys
Bacterio-chlorophyll a	Isatin	Asp Arg Ala	Phenylmethanethiol	N-Methyl-L-glutamate	Azelaoyl PAF		Glycerol 1,3-dihexadecanoate
Bacterio-chlorophyll b	Isodiospyrin	Asp Asp Arg	Phe-TyrMe-OH	N-Nitrosodi-n-butylamine	Azelastine		Glycerol triundecanoate
bacteriohopane-,32,33,34-triol-35-cyclitol	Isoleucyl-Histidine	Asp Cys Cys	Philanthotoxin	N-Oleoyl Glycine	azido-FTY720		Glycerophospho-N-Arachidonoyl Ethanolamine
Bacteriorubixanthinal	Jamaicamide C	Asp Glu Phe	Phthioceranic acid (C48)	N-oleoyl threonine	bacteriohopane-32,33,34,35-tetrol		Glycinoprenol 11
Bakankoside	Junosine	Asp Lys Lys	p-Hydroxyphenylbutazone	Nordihydrocodeine	Balenine		Goshonoside F4
Bakers yeast extract	JWH 200-d5	Asp Ser Trp	p-Hydroxyphenytoin glucuronide	Normeperidinic acid glucuronide	Barban		Gossypol
bayogenin 3-O-cellobioside	JWH 368	Asparaginyl-Hydroxyproline	Phylloquinone	Nosiheptide	Batyl Alcohol		Gravacridonediol glucoside
BAY-u9773	JWH011	Aspidin	Physagulin B	Noviflumuron	BAY-11-7082		Griseofulvin
b-Chlorogenin 3-[2'',4''-dirhamnosylglucoside]	JWH203-3 Chrophenyl isomer	Aspulvinone H	PI(17:1(10Z)/0:0)	N-palmitoyl tryptophan	BEC		Guajavin B
b-D-Glucopyranosiduronic acid	Kabiramide C	Asterogenol	PI(18:0/14:1(9Z))	N-tryptophanyl-35-aminobacteriohopane-32,33,34-triol	Behenyl alcohol		GW 0791
b-D-Xylopyranosyl-(1->4)-a-L-rhamnopyranosyl-(1->2)-L-arabinose	Kaempferol 3-(3'',4''-diacetylrhamnoside)	Atazanavir	PI(18:1(9Z)/18:1(9Z))	N-undecanoyl-L-Homoserine lactone	Benazepril		H 152/66
Beauvericin	Kanzonol R	Atorvastatin	PI(18:2(9Z,12Z)/14:1(9Z))	Oleoyl 3-carbacyclic Phosphatidic Acid	Benazeprilat		Halopemide
Becanamycin	KDdiA-PC	Atracurium (Quaternary acid)	PI(18:3(9Z,12Z,15Z)/13:0)	Oligomycin D	Bendroflumethiazide		Hebevinoside VII
Beclomethasone 21-propionate	Ketospirilloxanthin	Atracurium (Quaternary monoacrylate)	PI(20:1(11Z)/0:0)	Ornaline	Benzonatate (2,5,8,11,14,17,20,23,26-Nonaoxaoctacosan-28-yl p-(butylamino)-benzoate		Heptadecanoyl carnitine
Belladonnine	L-2,3-Dihydrodipicolinate	Atraton	PI(22:0/13:0)	Oxepahyperforin	Benzoximate		Hercynine
Benperidol	L-655,240	Atropine Methyl	PI(22:0/21:0)	Oxfendazole	Benzoyl meso-tartaric acid		Hexachloro-1,3-butadiene
Benquinox	L-Citronellol glucoside	Austalide A	PI(22:2(13Z,16Z)/0:0)	PA(12:0/0:0)	Berberrubine		Hexan-2-ol
Benzimidazole	LDS-751	Austin	PI(22:5(7Z,10Z,13Z,16Z,19Z)/18:0)	PA(12:0/14:0)	beta-Cymaropyranose		Hexanolamino PAF C-16
Benzpyrene	Leptomycin B	Avenalumin III	PI(P-16:0/18:2(9Z,12Z))	PA(17:0/13:0)	Betulalbuside A		hexyl octadecanoate
Benztropine	Leu Pro Gly	Avermectin A1a	PI(P-16:0/20:5(5Z,8Z,11Z,14Z,17Z))	PA(18:0/14:0)	Biapenem		Hirsutidin
beta1-Chaconine	Leu Val Arg	Avermectin A2a aglycone	PI-Cer(t18:0/16:0(2OH))	PA(18:3(6Z,9Z,12Z)/13:0)	Biocytin		His Arg Tyr
beta-D-Glucosyloxydestruxin B	Leucomycin A8	Avermectin A2a monosaccharide	Pongone	PA(18:3(6Z,9Z,12Z)/17:0)	Biopterin		Hispaglabridin A
Betaine aldehyde	Leucopterin	Axitinib	PP2	PA(19:0/22:6(4Z,7Z,10Z,13Z,16Z,19Z))	Bis(2,5-dimethyl-3-furanyl) disulfide		Hordatine A
beta-Rhodomycin	Leukotriene D4 methyl ester	Azelaoyl PAF	Precorrin 5	PA(20:1(11Z)/22:6(4Z,7Z,10Z,13Z,16Z,19Z))	Bis(2-furanylmethyl) sulfide		Hydrocortamate
Betavulgaroside IV	Leukotriene D4-d5	azido-FTY720	Pregna-5,16,20-triene-3beta,20-diol diacetate	PA(20:3(8Z,11Z,14Z)/19:0)	Bis(m-methanethiolato)tetranitrosyldiiron		Hydrogenobyrinate a,c diamide
Bialaphos	Lignoceroyl-EA	Bacterio-chlorophyll a	Pristimerin	PA(20:4(5Z,8Z,11Z,14Z)/20:0)	Bisdesethylchloroquine		Hydroxyanastrozole
Bifenazate	Lilaline	bacteriohopane-,32,33,34-triol-35-cyclitol	Pro Gln Arg	PA(21:0/13:0)	Bisnorbadioquinone A		Hydroxydestruxin B
BILA 2185BS	Limonene-1,2-epoxide	bacteriohopane-,32,33,34-triol-35-cyclitolguanine	Pro Phe Phe	PA(22:2(13Z,16Z)/14:1(9Z))	Bisphenol A dimethacrylate		Hydroxyphthioceranic acid (C43)
Bis(2-hydroxyethyl)dithiocarbamic acid	Limonoate D-ring-lactone	bacteriohopane-32,33,34,35-tetrol	Proglumide	PA(22:4(7Z,10Z,13Z,16Z)/18:4(6Z,9Z,12Z,15Z))	Bispyribac		Hyperforin
Bis(4-methoxybenzoyl)-3a,29-dihydroxy-8-multifloren-7-one	Lincomycin	Bacteriorubixanthinal	Promegestone	PA(22:4(7Z,10Z,13Z,16Z)/22:6(4Z,7Z,10Z,13Z,16Z,19Z))	Blasticidin S		Indolylmethylthiohydroximate
bis(7)-Tacrine	Linoleamide	Bakers yeast extract	Propinol adenylate	PA(22:6(4Z,7Z,10Z,13Z,16Z,19Z)/13:0)	Blumenol C glucoside		Indomethacin heptyl ester
Bisacodyl	Linolein Hydroperoxides	Balenine	Prostaglandin E1-d4	PA(22:6(4Z,7Z,10Z,13Z,16Z,19Z)/22:1(11Z))	BMS-268770		Indoxylsulfuric acid
Bismurrayafoline E	Linustatin	Batyl Alcohol	Protionamide	PA(O-16:0/18:2(9Z,12Z))	Boc-Phe(NMe)-Pro-Phe(NMe)-Gly-OMe		Inositol-P-ceramide
BIX01294	Liriodendrin	bayogenin 3-O-cellobioside	PS(12:0/14:1(9Z))	PA(O-20:0/20:5(5Z,8Z,11Z,14Z,17Z))	Boc-Pro-Phe(NMe)-Gly-OMe		Integerressine
Blepharin	Lithocholate 3-O-glucuronide	BAY-u9773	PS(22:2(13Z,16Z)/20:2(11Z,14Z))	PA(P-16:0/14:1(9Z))	Bolegrevilol		Inuline
Blestriarene B	Lomustine	b-Chlorogenin 3-[2'',4''-dirhamnosylglucoside]	PS(22:2(13Z,16Z)/22:1(11Z))	PA(P-18:0/15:1(9Z))	Braxoron		Ipecac (Emetine)
Boc-Phe(NMe)-Gly-OMe	Lophirone I	b-D-Glucopyranosiduronic acid	PS(22:4(7Z,10Z,13Z,16Z)/20:4(5Z,8Z,11Z,14Z))	PA(P-20:0/16:1(9Z))	Brevianamide B		Iprobenfos
Brassica napus non-fluorescent chlorophyll catabolite 3	LTB4 ethanol amide	b-D-Xylopyranosyl-(1->4)-a-L-rhamnopyranosyl-(1->2)-L-arabinose	PS(22:6(4Z,7Z,10Z,13Z,16Z,19Z)/22:1(11Z))	Panaxydol	Bromisovalum		Irisresorcinol
Brassicanal A	Lucidenic acid A	Beauvericin	PS(O-20:0/18:0)	Panaxynol linoleate	Bromoxynil		Isobutyric acid
Bromadiolone	Lumazine	Behenyl alcohol	PS(O-20:0/22:6(4Z,7Z,10Z,13Z,16Z,19Z))	Pandamarilactam 3x	Browniine		Isocarbamid
Bromotheophylline	Lupinate	Belladonnine	PS(P-16:0/14:1(9Z))	Pandamine	Bruceantin		Isononane
Bufotalin	Lys Asn Cys	Benquinox	PS(P-20:0/21:0)	PC(10:0/16:1(9Z))	Bruceantinol		Isorhamnetin 3-rhamnosyl-(1->2)-gentiobiosyl-(1->6)-glucoside
Buprenorphine	Lys Gln Val	Benzoyl meso-tartaric acid	PS(P-20:0/22:6(4Z,7Z,10Z,13Z,16Z,19Z))	PC(16:0/15:1(9Z))	Brucine		Isovitexin 2''-(6'''-feruloylglucoside) 4'-glucoside
Buprenorphine 3-O-glucuronide	Lys Lys Gln	beta1-Chaconine	PtdIns-(4,5)-P2-fluorescein	PC(18:1(9Z)/4:0)	Brugine		Istamycin A3
Butter acids	Lys Phe Asp	beta-Cymaropyranose	Pyributicarb	PC(18:3(6Z,9Z,12Z)/18:1(11Z))	Bupirimate		Istamycin AO
Butyl (S)-3-hydroxybutyrate [arabinosyl-(1->6)-glucoside]	Lys Trp	Betaine aldehyde	Pyrimidifen	PC(18:4(6Z,9Z,12Z,15Z)/22:6(4Z,7Z,10Z,13Z,16Z,19Z))	Buspirone		Istamycin FU-10
Butyl 3'-O-butanoyl-4,6,4'-tri-O-(2-methylpropanoyl)-neohesperidoside	Lys Tyr Val	beta-Rhodomycin	Pyriminobac	PC(18:4(6Z,9Z,12Z,15Z)/P-16:0)	Busulfan		IU1
Butyl isobutyrate	LysoPC(26:1(5Z))	Betulalbuside A	Pyrocurzerenone	PC(19:1(9Z)/18:0)	Butacaine		Jamaicamide B
Butyl oleate sulfate	Lysyl-Histidine	Bifenazate	Quercetin 3-(2''-caffeylglucuronide)	PC(19:1(9Z)/18:3(9Z,12Z,15Z))	Buthionine sulfoximine		Jasmolone glucoside
C.I. Direct Red 45	Lyxosylamine	BILA 2185BS	Quercetin 3-(2''-galoylrutinoside)	PC(20:0/19:0)	Butyl (S)-3-hydroxybutyrate glucoside		Juliflorine
C.I. Pigment Red 149	Mafoprazine mesylate	Biopterin	Quercetin 3-(6''-malonylneohesperidoside)	PC(20:3(5Z,8Z,11Z)/20:2(11Z,14Z))	Butyl 1-(methylthio)propyl disulfide		Jurubine
C16 Sulfatide	Malhamensilipin A	Bis(4-methoxybenzoyl)-3a,29-dihydroxy-8-multifloren-7-one	Quercetin 3-(6''''-sinapylsophorotrioside)	PC(20:4(5Z,8Z,11Z,14Z)/20:3(8Z,11Z,14Z))	Butyl 2-methylbutanoate		Kaempferol 3-(2'',6''-di-(E)-p-coumarylglucoside)
C19 Sphingosine-1-phosphate	Mangiferin 6'-gallate	Bisphenol A glycidylmethacrylate	RCS-8	PC(22:2(13Z,16Z)/22:6(4Z,7Z,10Z,13Z,16Z,19Z))	C16 Sphingosine-1-phosphate		Kaempferol 3-sulfate-7-alpha-arabinopyranoside
C20-OHSulfatide	Maritimetin 6-(6''-acetylglucoside)	Bitertanol	Ribosylhopane	PC(22:4(7Z,10Z,13Z,16Z)/24:0)	C22 Sulfatide		Kanzonol V
C25:1n-6	Mazindol	Blepharin	Roquefortine	PC(22:5(4Z,7Z,10Z,13Z,16Z)/22:6(4Z,7Z,10Z,13Z,16Z,19Z))	C24:1 Sulfatide		Kinetin Riboside
C27:1n-7	MDL 74156 glucuronide	Blestriarene B	R-Soterenol	PC(22:6(4Z,7Z,10Z,13Z,16Z,19Z)/15:0)	C25:3 6,7-Epoxy highly branched isoprenoid		Kolanone
C31:9 hydrocarbon	Mebeverine metabolite (1-Butanol, 4-[ethyl[2-(4-methoxyphenyl)-1-methylethyl]amino]-)	Blumenol C O-[rhamnosyl-(1->6)-glucoside]	Rutacridone	PC(22:6(4Z,7Z,10Z,13Z,16Z,19Z)/15:1(9Z))	Caffeine		KT 5720
C8-Dihydroceramide	Melleolide K	BMS-268770	Rutinose	PC(22:6(4Z,7Z,10Z,13Z,16Z,19Z)/16:1(9Z))	Callystatin A		Kukoamine C
Cadabicine	Melleolide L	Brassica napus non-fluorescent chlorophyll catabolite 3	S-4-benzyl-3-((S)-3-hydroxy-2,2-dimethyloct-7-ynoyl)-5,5-dimethyloxazolidin-2-one	PC(22:6(4Z,7Z,10Z,13Z,16Z,19Z)/19:1(9Z))	Calomelanol H		Kurarinol
Cadusafos	Met Gln Asn	Brassicanal A	Salermide	PC(23:0/11:0)[U]	Calomelanol J		Kyotorphin
Cafenstrole	Met Gln Lys	Braxoron	Sanguisorbin E	PC(25:0/11:0)[U]	Cancentrine		LacCer(d18:0/14:0)
Caffeoylcycloartenol	Met Met Gly	Brevianamide B	Selenomethionine	PC(8:0/5:0)[U]	Caproic acid		Lamtidine
Calcium-dependent antibiotic	Met Tyr Tyr	Brodifacoum	Ser Glu Met	PC(9:0/5:0)	Capsorubinidione		lanosteryl oleate
Canarigenin 3-[glucosyl-(1->4)-6-deoxy-alloside]	Met Val	Bromadiolone	Ser Pro Glu	PC(O-16:0/O-5:0)[U]	Captafol		Lansiumamide B
Canavalioside	Methyl (9Z)-8'-oxo-6,8'-diapo-6-carotenoate	Bromisovalum	Sertindole	PC(O-16:1(9Z)/20:4(8Z,11Z,14Z,17Z))	Carbamorph		L-Arogenate
Candimine	Methyl 18-bromo-15E,17E-octadecadien-5,7-diynoate	Bromotheophylline	Simetryn	PC(O-18:0/20:4(8Z,11Z,14Z,17Z))	Caribenolide I		Laserpitin
Candletoxin A	Methyl 3,4,5-trimethoxycinnamate [arabinosyl-(1->3)-[glucosyl-(1->6)]-glucosyl] ester	Bromoxynil	SM(d18:1/14:0)	PC(O-8:0/O-8:0)	Caryoptin		Latanoprost ethyl amide
Candoxatrilat	Methylbenzethonium	Browniine	SM(d18:1/26:1(17Z))	PC(P-20:0/21:0)	Casimiroedine		L-beta-aspartyl-L-leucine
Cannabipiperidiethanone	Methyldopa	Bruceantin	SM(d18:2/21:0)	PE(10:0/12:0)[U]	CAY10433		Lenalidomide
Capecitabine	Methylene blue	Brugine	SM(d18:2/22:1)	PE(18:2(9Z,12Z)/12:0)	CAY10441		Leu Cys Val
Capreomycin	Methylmethionine sulfonium salt	Busulfan	Spectinomycin adenylate	PE(18:2(9Z,12Z)/22:6(4Z,7Z,10Z,13Z,16Z,19Z))	CAY10464		Leucomycin V
Capryloylglycine	Metixene	Butacaine	Spiramycin 3	PE(18:3(9Z,12Z,15Z)/14:1(9Z))	CAY10565		Leukotriene E3
Capsazepine	Metoxuron	Buthionine sulfoximine	Sudan I	PE(19:0/22:1(11Z))	CAY10575		Levocabastine
Capsoside A	Met-Phe4Cl-OH	Butyl 1-(methylthio)propyl disulfide	Sulfadoxine glucuronide	PE(20:0/17:0)	CAY10589		LFM-A13
Carbendazim	Metsulfovax	Butyl 2-methylbutanoate	Sumatriptan	PE(20:1(11Z)/12:0)	CDP-1L-myo-inositol		L-Glutamic acid n-butyl ester
Carbetapentane	Metsulfuron-methyl	Butyl 3'-O-butanoyl-4,6,4'-tri-O-(2-methylpropanoyl)-neohesperidoside	talinolol	PE(20:2(11Z,14Z)/13:0)	Ceanothine B		Linamarin
Carboxyltolmetin	Mibefradil	Butyl isobutyrate	Tetrahydroxyalmitrine	PE(20:4(5Z,8Z,11Z,14Z)/13:0)	Ceanothine D		Linolenyl laurate
Carboxyltolmetin-3-glucuronide	Minosaminomycin	Butyl oleate sulfate	tetranor-PGDM-d6	PE(21:0/19:0)[U]	Cefadroxil		Linolenyl myristate
Carindacillin	Minoxidil	C.I. Direct Red 45	TG(10:0/10:0/10:0)	PE(22:1(11Z)/22:6(4Z,7Z,10Z,13Z,16Z,19Z))	Ceftibuten		Litcubinine
Carmamycin B	Miraxanthin-III	C.I. Pigment Red 149	TG(12:0/12:0/22:6(4Z,7Z,10Z,13Z,16Z,19Z))[iso3]	PE(22:4(7Z,10Z,13Z,16Z)/21:0)	Celereoin		L-N-Carboxymethylserine
Carminomycin	Misoprostol (free acid)-d5	C16 Sphingosine-1-phosphate	TG(13:0/16:1(9Z)/18:4(6Z,9Z,12Z,15Z))[iso6]	PE(22:4(7Z,10Z,13Z,16Z)/P-18:0)	Cer(d18:1/19:0)		Lonchocarpol B
Carpipramine	Mitobronitol	C20 Sulfatide	TG(14:1(9Z)/14:1(9Z)/17:2(9Z,12Z))[iso3]	PE(O-20:0/17:2(9Z,12Z))	Cer(d20:0/18:0)		Lorazepam glucuronide
Carteolol	Molinate	C20-OHSulfatide	TG(17:1(9Z)/17:1(9Z)/20:5(5Z,8Z,11Z,14Z,17Z))[iso3]	PE(O-20:0/19:0)	Cer(t18:0/16:0(2OH))		lorcainide
Castacrenin B	Monensin	C22-OH Sulfatide	TG(18:4(6Z,9Z,12Z,15Z)/18:4(6Z,9Z,12Z,15Z)/20:5(5Z,8Z,11Z,14Z,17Z))[iso3]	PE(P-16:0/12:0)	Cer(t20:0/26:0(2OH))		Luteoxanthin
Catharanthine	Montanin	C25:3 6,7-Epoxy highly branched isoprenoid	Thaumatin b, recombinant	PE(P-16:0/20:4(5Z,8Z,11Z,14Z))	Ceramide (d18:1/12:0)		Lyciumin A
CAY10406	Morphinan-3-ol, hydrogen sulfate	C31:9 hydrocarbon	Thiocarbohydrazide	PE(P-18:0/22:1(11Z))	Ceramide (d18:1/26:1(17Z))		Lyciumoside VIII
CAY10408	Mosinone A	C-6 NBD-dihydro-Ceramide	Thionazin	PE(P-20:0/18:3(9Z,12Z,15Z))	CerP(d18:1/12:0)		Lys Ser Ser
CAY10412	Mucronine A	Cadabicine	Thiorphan	PE(P-20:0/22:4(7Z,10Z,13Z,16Z))	CerP(d18:1/16:0)		Lyso-PAF C-16-d4
CAY10444	Muricatin C	Cadusafos	Thr His Ala	PE-Cer(d14:1(4E)/18:0(2OH))	CerP(d18:1/18:0)		LysoPE(0:0/14:1(9Z))
CAY10509	Murrayacinine	Calcium-dependent antibiotic	Thr Lys Glu	PE-Cer(d16:1(4E)/22:0(2OH))	Cetraxate benzyl ester		LysoPE(0:0/20:0)
CAY10510	Mycalamide A	Callystatin A	Thr Met Asn	PE-Cer(d16:2(4E,6E)/20:1(11Z))	CGS 7181		LysoPE(0:0/20:2(11Z,14Z))
CAY10561	Mycalamide B	Calotropin	Thr-Asp-OH	Pentacosanoic acid	Chaetoglobosin A		LysoPE(22:1(13Z)/0:0)
CAY10566	Myrtucommulone A	Canarigenin 3-[glucosyl-(1->4)-6-deoxy-alloside]	Thymine	Peonidin 3-(6''-acetylglucoside)	Chaulmosulfone		M 344
CAY10572	Myxol glycoside/ (Myxoxanthophyll)	Canavalioside	Tiletamine	Permetin A	Chloralose		Macrozamin
CAY10580	N-(2R-hydroxy-15-methyl-3E-octadecenoyl)-4E,10E,12E-sphingatrienine	Cancentrine	Tolbutamide	PF-750	Chlorbufam		makisterone B
CAY10590	N-(3-(15-methyl-hexadecanoyloxy)-13-methyl-tetradecanoyl)-L-serine	Cannabipiperidiethanone	Tolterodine	PG(12:0/14:1(9Z))	Chlorothiazide		Malachite green
CAY10598	N-(4-Chloro-3-methyl-5-isothiazolyl)-N-methyl-2-[p-[(alpha,alpha,alpha-trifluoro-p-tolyl)oxy]phenyl]acetamide	Capecitabine	trans-2-Enoyl-OPC6-CoA	PG(12:0/18:2(9Z,12Z))	Chlorotrianisene		MAM2201 N-(4-hydroxypentyl) metabolite
CAY10606	N-(furan-2-ylmethyl)-1H-pyrazolo[3,4-d]pyrimidin-4-amine	Capsoside A	Triallate	PG(18:0/14:0)[U]	Chloroxylenol		Mannosyl-1beta-phosphomycoketide C33
CAY10626	N,N-Didesmethyltamoxifen	Carboxyltolmetin	Tricetin 3'-methyl ether 7,5'-diglucuronide	PG(18:0/22:1(11Z))	Chlorprothixene		Matteucinol 7-O-glucoside
CB3717	N,N-dimethyl arachidonoyl amine	Caribenolide I	Tricin 7-rhamnosyl-(1->2)-galacturonide	PG(20:1(11Z)/0:0)	Chlorpyrifos		Mazaticol
Cefmenoxime	N,N-Hexamethyleneamiloride	Carmamycin B	Tridecyl oleate	PG(20:2(11Z,14Z)/22:6(4Z,7Z,10Z,13Z,16Z,19Z))	Chlorpyrifos-methyl		Mebeverine
Cefovecin	N3-Metyladenine	Carminomycin	Trifluoromethylphenylpropanediol	PG(20:3(8Z,11Z,14Z)/20:2(11Z,14Z))	Chlorthal		Megalomicin A
Cefpirome	N-Acetyl-5-hydroxysulfapyridine	Carteolol	Tris(2-methyl-1-aziridinyl)phosphine oxide	PG(20:4(5Z,8Z,11Z,14Z)/14:1(9Z))	Chlorzoxazone		Melatonin
Celastrol	N-Acetyl-8-O-methyl-Neuraminic acid	Caryoptin	Trithionic acid	PG(22:0/17:1(9Z))	cholest-22E-en-3beta-ol		Mesobilirubinogen
Celiprolol	N-acetyl-S-geranylgeranyl-L-Cysteine	Casimiroedine	Trp Cys Ser	PG(22:0/17:2(9Z,12Z))	Cholestane-3,7,12,25-tetrol-3-glucuronide		Met Met Asn
Cer(d14:1(4E)/20:0(2OH))	Nafoxidine	CAY10408	Trp Gln Thr	PG(22:0/18:3(9Z,12Z,15Z))	Cholesteryl 11-hydroperoxy-eicosatetraenoate		Met-Ala-OH
Cer(d18:0/14:0)	Nap-Abu-OH	CAY10433	Trp Gly Cys	PG(22:1(11Z)/19:1(9Z))	Ciclesonide		Metazocine
Cer(d18:0/16:0)	N-Arachidonoyl Dopamine-d8	CAY10510	Trp His Arg	PG(22:1(11Z)/22:6(4Z,7Z,10Z,13Z,16Z,19Z))	cimicifoetiside B		MET-enkephalin
Cer(d18:2/22:0)	Narasin B	CAY10561	Trp Leu Leu	PG(22:4(7Z,10Z,13Z,16Z)/22:6(4Z,7Z,10Z,13Z,16Z,19Z))	Cimicifugoside		Methaphenilene
Cer(d18:2/23:0)	N-Desmethyleletriptan	CAY10566	Trp Lys Cys	PG(O-16:0/15:1(9Z))	Cinnzeylanol		Methyl 3-oxo-12-oleanen-28-oate
Ceramide (d18:1/24:0)	N-Didesmethylmifepristone (RU 42848)	CAY10572	Trp Met His	PG(O-16:0/22:0)	cis-4-Decenol		methyl 9-hydroperoxy-10,12-epidioxy-13,15-octadecadienoate
Cerasin	N-docosanoyl taurine	CAY10626	Trp Phe Cys	PG(O-16:0/22:1(11Z))	Citalopram aldehyde		Methyl dioxindole-3-acetate
CerP(d18:1/24:0)	Nebramycin factor 4	CAY10654	Tyr Gln Leu	PG(O-20:0/20:4(5Z,8Z,11Z,14Z))	CL(20:4(8Z,11Z,14Z,17Z)/20:1(11Z)/18:2(9Z,12Z)/18:2(9Z,12Z))		Methylcobalamin
CerP(d18:1/26:0)	Neferine	CB3717	Tyr-Ile-OH	PG(P-16:0/20:4(5Z,8Z,11Z,14Z))	Clavaminic acid		MG(0:0/22:4(7Z,10Z,13Z,16Z)/0:0)
Cevimeline	Nemonapride	Cefadroxil	TyrMe-Leu-OH	PG(P-20:0/22:2(13Z,16Z))	Clenbuterol		MGDG(16:0/18:2(9Z,12Z))
CGP71422	Nepafenac	Cefmenoxime	TyrMe-Met-OH	PGS	Clindamycin		MGDG(18:1(9Z)/18:1(9Z))
Chabrosterol	Neryl rhamnosyl-glucoside	Cefpirome	Undecaprenyl phosphate α-L-Ara4FN	Phe Phe Asp	Clindamycose		Microcolin B
Chikusetsusaponin Ia	NeuAcalpha2-6Galbeta1-3GlcNAcbeta1-3Galbeta1-4Glcbeta-Cer(d18:1/16:0)	Celereoin	Uscharidin	Phe Pro Asp	Clopidogrel		Militarinone C
Chivosazole C	NeuAcalpha2-6Galbeta1-3GlcNAcbeta1-3Galbeta1-4Glcbeta-Cer(d18:1/18:0)	Celiprolol	Val Gln Arg	Phe Trp Val	Clopidol		Millinol B
Chlorate	N-Formylnorfloxacin	Cer(d14:1(4E)/20:0(2OH))	Val Gln Pro	Phe Tyr Trp	Coagulin R 3-glucoside		Minabeolide-2
Chlordecone alcohol	NG-amino-L-Arginine	Cer(d14:1/24:0)	Val Pro His	Phenothrin	Coixinden B		MIPC(t18:0/16:0(2OH))
Chlordiazepoxide	N-Gluconyl ethanolamine	Cer(d18:0/12:0)	Val Pro Lys	Phenylalanyl-Lysine	Colforsin		Mitoxantrone
Chloroprocaine	N-Hydroxy-L-tyrosine	Cer(d18:2/23:0)	Val Tyr Glu	Phosphocreatine	Compound III(S)		Molsidomine
Chlorozotocin	Nicarbazin	Ceramide (d18:1/26:1(17Z))	Val Val Met	Physalolactone	Condelphine		Molybdopterin guanine dinucleotide
cholest-5,24-dien-3beta-ol 3-O-beta-D-glucopyranoside	Nicardipine	Cerasin	Valerylglycine	PI(14:1(9Z)/13:0)	Congo red		Mometasone Furoate
Cholesta-5,7-dien-3beta-ol benzoate	Nicotinamide, N-(2-hydroxyethyl)-	Cevimeline	Val-His-OH	PI(18:2(9Z,12Z)/17:0)	Coniferyl Alcohol		Momordol
Chondrosine	Nicotine imine	CGP71422	Valyl-Glutamine	PI(18:4(6Z,9Z,12Z,15Z)/16:1(9Z))	Conivaptan		Monodesmethyl chlorpheniramine
Chrycolide	Niddamycin	CGS 7181	Venlafaxine	PI(19:0/21:0)	Corchorosol A		Mucoxin
CI Pigment Red 3	Nigroxanthin	Chaetoglobosin A	Verapamil	PI(19:1(9Z)/18:3(6Z,9Z,12Z))	Coroloside		Mulberrofuran C
Cicerin 7-(6-malonylglucoside)	Nimesulide	Chivosazole C	Vicenistatin	PI(20:0/12:0)	Corotoxigenin-3-O-alpha-L-rhamnopyranoside		Muricatenol
Ciceritol	nitecapone	Chlorbufam	Vinaginsenoside R1	PI(20:1(11Z)/17:2(9Z,12Z))	Corynomycolic acid		Muricatin B
Cilazprilat	Nitine	Chlordiazepoxide	V-PYRRO/NO	PI(21:0/15:0)	Cotarnine		Muridienin 1
cimicifoetiside A	N-Methyl-2,3,7,8-tetramethoxy-5,6-dihydrobenzophenathridine-6-ethanoic acid	Chloroxylenol	Withaphysacarpin	PI(21:0/16:0)	Cotinineglucuronide		Mycinamicin II
Cinalukast	N-Nitrosodi-n-butylamine	Chlorozotocin	Xanthoangelol F	PI(21:0/22:1(11Z))	CPA(18:2(9Z,12Z)/0:0)		Mycothione
Cinnamyl anthranilate	N-oleoyl leucine	Chlorpyrifos-methyl	Xanthoxylin	PI(22:0/0:0)	Credazine		N-(1-Deoxy-1-fructosyl)valine
Cinncassiol A 19-glucoside	Norbinaltorphimine	Chlorthal	xi-1-(Propylthio)-1-propanethiol	PI(22:0/19:0)	Crinasiadine		N-(2-phenylethyl)-Indomethacin amide
Cinncassiol C1 19-glucoside	Norcocaine nitroxide	Cholesta-5,7-dien-3beta-ol benzoate	Zanthodioline	PI(22:0/22:0)	Crinasiatine		N-(2R-Hydroxyhexadecanoyl)-2S-amino-9-methyl-4E,8E-octadecadiene-1,3R-diol
Cinncassiol D2 glucoside	Noruron	Cholestane-3,7,12,25-tetrol-3-glucuronide	Zeaxanthin diglucoside/ Zeaxanthin β-D-diglucoside	PI(22:2(13Z,16Z)/15:0)	CV 2961		N-(4,7-Dihydroxy-8-methyl-2-oxo-2H-chromen-3-yl)-2,2-dimethylchromane-6-carboxamide
Ciprofibrate	N-palmitoyl glutamic acid	Chondrosine	zeleplon	PI(O-16:0/19:1(9Z))	Cyanidin 3-(6''-sinapylsophoroside)-5-glucoside		N-(α-Linolenoyl) Tyrosine
cis- and trans-L-Mercapto-p-menthan-3-one	N-palmitoyl proline	Chrycolide	Zidovudine triphosphate	PI(P-16:0/14:0)	Cyanotriphenylborate		N,N-Diethyl-2-[4-[6-methoxy-2-(4-methoxyphenyl)-1H-inden-3-yl]phenoxy]ethanamine
cis-Chlorobenzene dihydrodiol	N-palmitoyl tryptophan	CI Pigment Red 3	ZK118182 isopropyl ester	PI(P-18:0/18:3(9Z,12Z,15Z))	Cyazofamid		N1-(2,4-Dimethoxybenzyl)-n2-(2-(pyridin-2-yl) ethyl)oxalamide
cis-β-D-Glucosyl-2-hydroxycinnamate	N-tert-Butyloxycarbonyl-deacetyl-leupeptin	Cicerin 7-(6-malonylglucoside)	ZM 336372	PI(P-20:0/19:1(9Z))	Cycloheptanecarboxylic acid		N-Acetyl-leu-leu-leu-leu-leu-tyr-amide
Citalopram (propionic acid derivative)	Nystatin A1	Ciceritol	α-Zeacarotene	PI-Cer(d18:0/24:0)	Cyclopassifloic acid A		N-Acetyl-leu-leu-leu-leu-tyr-amide
Citalopram-N-Oxide	Oceanalin A	Cinalukast	Δ4-Tibolone	PI-Cer(d20:0/20:0)	Cypendazole		N-Acetylmuramoyl-Ala
Citiolone	Ochotensine	Cinnamyl anthranilate		Pilocereine	Cyproheptadine glucuronide		Nandrolone phenpropionate
Citranaxanthin	Octanoic acid, 3-amino-, (1)-	Ciprofibrate		PIP(18:0/16:0)	Cys His		Narbomycin
Citroside A	OH-Spheroidenone	cis- and trans-L-Mercapto-p-menthan-3-one		Pirbuterol	Cys-Asp-Pro-Gly-Tyr-Ile-Gly-Ser-Arg		Narwedine
CL(22:6(4Z,7Z,10Z,13Z,16Z,19Z)/18:2(9Z,12Z)/18:2(9Z,12Z)/18:2(9Z,12Z))	o-Hydroxyfinasteride	cis-Chlorobenzene dihydrodiol		Pirenzepine	Cysteinyl-Arginine		Natsudaidain 3-glucoside
CL(22:6(4Z,7Z,10Z,13Z,16Z,19Z)/20:4(5Z,8Z,11Z,14Z)/18:3(6Z,9Z,12Z)/18:2(9Z,12Z))	Olmesartan Medoxomil	Citalopram (propionic acid derivative)		Piscerythramine	Cytochalasin A		n-decanohydroxamic acid
Clarithromycin	O-propanoyl-carnitine	Citiolone		Pitheduloside B	Cytotrienin A		Neotame
Clavamycin A	Ornaline	Citrusin A		Plantaricin BN	D-4'-Phosphopantothenate		N-formylanthranilic acid
Clindamycin sulfoxide	Orysastrobin	CL(22:6(4Z,7Z,10Z,13Z,16Z,19Z)/18:2(9Z,12Z)/18:2(9Z,12Z)/18:2(9Z,12Z))		Plectaniaxanthin/ (2'R)-Plectaniaxanthin	Dacthal		N-Formylmethionyl-Leucylphenylalanine
Clioquinol	OSU03012	CL(22:6(4Z,7Z,10Z,13Z,16Z,19Z)/20:4(5Z,8Z,11Z,14Z)/18:3(6Z,9Z,12Z)/18:2(9Z,12Z))		poriferast-5-en-3β-ol	Daphnoline		N-Hydroxy-4-aminobiphenyl
Clitidine	Oxadixyl	Clarithromycin		Porphobilinogen	Darifenacin		Nigakilactone C
Clivoline	Oxaloglutarate	Clavaminic acid		PPA(18:1(9Z)/18:1(9Z))	Dasatinib		Nitralin
Clofop	Oxepahyperforin	Clavamycin A		Precorrin 3A	DAT(16:0/21:0(2Me[S],3OH[S],4Me[S],6Me[S]))		Nitro blue tetrazolium
Cloversaponin I	oxy-Arachidonoyl Ethanolamide	Clindamycose		Premithramycin A3	D-Biotin		N-Methyl-1H-indole-3-propanamide
Clovoxamine	PA(18:3(6Z,9Z,12Z)/17:0)	Clioquinol		Proanthocyanidin A2	Deacetylcephalosporin C		N-Methylformamide
Clupanodonyl carnitine	PA(19:0/0:0)	Clitidine		Probenecid	Deacetyldiltiazem		N-Methyl-N-(2-phenylethenyl)-3-phenyl-2-oxiranecarboxamide
Codonocarpine	PA(20:2(11Z,14Z)/18:0)	Clivoline		PROLI NONOate	Deacetyl-O-demethyldiltiazem		n-Methylnicotinamide
Coproporphyrinogen I	PA(22:0/18:3(6Z,9Z,12Z))	Clofop		Prontosil	Deacetylspironolactone		N-Methylputrescine
Coralyne	PA(22:1(11Z)/20:4(5Z,8Z,11Z,14Z))	Clopidogrel		Propanoylagmatine	Decarbamoylsaxitoxin		N-oleoyl histidine
Cortolone-3-glucuronide	PA(22:4(7Z,10Z,13Z,16Z)/12:0)	Clopidol		Prostaglandin E2 serinol amide	Deferasirox		N-oleoyl methionine
Crosatoside B	PA(22:4(7Z,10Z,13Z,16Z)/18:1(9Z))	Clupanodonyl carnitine		Prunus inhibitor b	Dehydroepiandrosterone 3-glucuronide		N-oleoyl taurine
Cucurbitacin B	PA(O-16:0/14:1(9Z))	Codonocarpine		PS(13:0/22:6(4Z,7Z,10Z,13Z,16Z,19Z))	Delcorine		N-oleoyl tyrosine
Cyanidin 3-(2G-xylosylrutinoside)	PA(O-16:0/15:1(9Z))	Coixinden B		PS(18:3(9Z,12Z,15Z)/18:3(6Z,9Z,12Z))	Delphinidin 3-(2''-galloylgalactoside)		Novclobiocin 104
Cyanidin 3-(6''-malylglucoside)	PA(O-16:0/16:1(9Z))	Coniferyl Alcohol		PS(18:4(6Z,9Z,12Z,15Z)/18:4(6Z,9Z,12Z,15Z))	Delphinidin 3-(2-xylosylgalactoside)-5-glucoside		N-palmitoyl threonine
Cyanopeptolin A	PA(O-16:0/18:4(6Z,9Z,12Z,15Z))	Coproporphyrinogen I		PS(19:1(9Z)/13:0)	Delphinidin 3-O-beta-D-(6-O-(E)-p-coumaryl)galactopyranoside		N-stearoyl valine
Cyanthoate	PA(P-18:0/22:6(4Z,7Z,10Z,13Z,16Z,19Z))	Cotarnine		PS(20:2(11Z,14Z)/0:0)	delta-Carotene-1,2-epoxide		N-Undecylbenzenesulfonic acid
Cyclic adenosine diphosphate ribose	Palmatine	Crinasiatine		PS(20:2(11Z,14Z)/15:1(9Z))	Demecarium		NVP-BEZ235
Cyclobuxine D	Palmitoleoyl 3-carbacyclic Phosphatidic Acid	Cucurbitacin B		PS(20:4(5Z,8Z,11Z,14Z)/17:1(9Z))	Demeton-S		Nylidrin
Cyclohexyl butanoate	Panaxydol	CV 2961		PS(21:0/0:0)	De-O-methylsimmondsin		O6-Methyl-2'-deoxyguanosine
Cyclolinopeptide A	Panaxynol linoleate	Cyanidin 3-(2G-xylosylrutinoside)		PS(22:1(11Z)/15:0)	Deoxyinosine		Obliquine
Cyclopassifloic acid E	Pantoyllactone glucoside	Cyanidin 3-(6''-malylglucoside)		PS(O-16:0/14:1(9Z))	Deoxypumiloside		Obscuraminol A
Cyclopassifloside III	Parachlorophenol	Cyanthoate		PS(O-16:0/15:0)	Deoxysappanone B Trimethyl Ether		Octreotide
Cyclopassifloside VII	Paraquat	Cyazofamid		PS(O-16:0/17:0)	D-Erythrose		OH-Chlorobactene glucoside ester
Cyclopiazonic Acid	para-Trifluoromethylphenol	Cyclic adenosine diphosphate ribose		PS(O-18:0/21:0)	Descinolone acetonide		Olanzapine
Cyclosporin A	Patuletin 3-(2''-apiosyl-[2'''-feruloylgentiobioside])	Cycloheptanecarboxylic acid		PS(P-16:0/15:1(9Z))	Desmethylflumazenil acid (Ro 15-6877)		Oleandomycin
Cyclovirobuxine C	PC(13:0/22:1(11Z))	Cyclolinopeptide A		PS(P-18:0/13:0)	Desmethylmethotrimeprazine		Oleic acid(d2)
Cyenopyrafen	PC(16:0/12:0)[U]	Cyclopassifloic acid A		PS(P-20:0/20:4(5Z,8Z,11Z,14Z))	Desmethylondansetron		Oleoyl Ethanolamide
Cynometrine	PC(16:0/13:0)	Cyclopassifloic acid E		PtdIns (4)-P1-fluorescein	Deterrol stearate		Oleoyl-EA(d2)
Cys Asn Asn	PC(16:0/23:5(8E,11E,14E,17E,20E))	Cyclopiazonic Acid		Ptelatoside A	Dexrazoxane		Oleyl isobutyrate
Cys Cys Lys	PC(16:1(9Z)/16:1(9Z))[U]	Cyclosporin A		Pterosin F	Dextrorphan sulfate		O-Methylganoderic acid O
Cys His Pro	PC(17:0/15:1(9Z))	Cynometrine		Pyropheophytin b	DG(12:0/19:0/0:0)[iso2]		OPC4-CoA
Cys Met	PC(18:0/0:0)[S]	Cyproheptadine glucuronide		Quadrigemine A	DG(14:0/15:0/0:0)		Ouabagenin
Cys Val Arg	PC(18:1(9E)/2:0)	Cys Cys Lys		Quercetin 3-(2''-p-hydroxybenzoyl-4''-p-coumarylrhamnoside)	DG(14:1(9Z)/22:6(4Z,7Z,10Z,13Z,16Z,19Z)/0:0)		Oxidized Watasenia luciferin
Cytochalasin Ppho	PC(18:2(9Z,12Z)/20:0)[U]	Cys Lys Met		Quindoxin	DG(20:0/18:1(11Z)/0:0)		Oxoglaucine
D1927	PC(18:3(6Z,9Z,12Z)/18:1(11Z))	Cytochalasin A		R-4-benzyl-3-((R)-3-hydroxy-2,2-dimethyloctanoyl)oxazolidin-2-one	DG(20:3(8Z,11Z,14Z)/16:0/0:0)		Oxpoconazole
Dapiprazole	PC(18:4(6Z,9Z,12Z,15Z)/22:6(4Z,7Z,10Z,13Z,16Z,19Z))	Dacthal		Radicinin	DG(20:5(5Z,8Z,11Z,14Z,17Z)/14:1(9Z)/0:0)		Oxychlordane
Decanal propyleneglycol acetal	PC(20:0/18:4(6Z,9Z,12Z,15Z))	Daphnetoxin		Ramipril	DG(22:1(13Z)/22:6(4Z,7Z,10Z,13Z,16Z,19Z)/0:0)[iso2]		Oxytocin
Dehydroanonaine	PC(22:2(13Z,16Z)/20:3(5Z,8Z,11Z))	Dasatinib		Resorufin	DG(22:4(7Z,10Z,13Z,16Z)/22:4(7Z,10Z,13Z,16Z)/0:0)		PA(12:0/15:1(9Z))
DehydroIndapamide	PC(22:6(4Z,7Z,10Z,13Z,16Z,19Z)/0:0)	D-Biotin		Rhizochalinin D	DG(22:6(4Z,7Z,10Z,13Z,16Z,19Z)/20:2(11Z,14Z)/0:0)		PA(12:0/18:4(6Z,9Z,12Z,15Z))
Dehydropachyrrhizone	PC(22:6(4Z,7Z,10Z,13Z,16Z,19Z)/16:1(9Z))	Deacetyldiltiazem		Rhodopin β-D-glucoside/ Rhodopin glucoside	DG(22:6(4Z,7Z,10Z,13Z,16Z,19Z)/22:6(4Z,7Z,10Z,13Z,16Z,19Z)/0:0)		PA(15:0/22:0)
Deidaclin	PC(22:6(4Z,7Z,10Z,13Z,16Z,19Z)/19:1(9Z))	Decanal propyleneglycol acetal		Ro 48-8071	DG(24:1(15Z)/22:2(13Z,16Z)/0:0)		PA(15:1(9Z)/0:0)
delta3,5-Deoxytigogenin	PC(26:0/12:0)[U]	Deferasirox		Rosinidin	D-Glucosyldihydrosphingosine		PA(16:0/13:0)
Deltorphin C	PC(8:0/5:0)[U]	Dehydroanonaine		Rotigotine	Dhurrin		PA(16:1(9Z)/12:0)
Demeclocycline	PC(9:0/5:0)	Dehydrofalcarinone		Ryanodine	Di-2-propenyl heptasulfide		PA(17:0/22:1(11Z))
Deoxycholic acid 3-glucuronide	PC(O-14:0/16:0)	Dehydropachyrrhizone		S9947	Diacetylaminoazotoluene		PA(18:2(9Z,12Z)/0:0)
Derricin	PC(O-14:0/O-14:0)[U]	Dehydroxyoxitropium		Sagittatin A	Dibekacin		PA(18:3(9Z,12Z,15Z)/17:2(9Z,12Z))
Desacetylsufentanil	PC(O-16:0/17:0)	Deidaclin		Salicin	Dibutyl succinate		PA(19:0/12:0)
Desacetylvinblastine	PC(O-16:2(9E,10E)/0:0)[U]	Deltorphin C		Salivaricin A	Dichlorophene		PA(19:0/22:6(4Z,7Z,10Z,13Z,16Z,19Z))
Descarbamoylnovobiocin	PC(O-18:0/14:0)	Demeclocycline		Sarmentoside B	Dicloralurea		PA(19:1(9Z)/18:3(6Z,9Z,12Z))
Descladinosyl-6-O-methylerythromycin	PC(O-18:0/O-3:1(2E))[U]	Demephion-O		Saxitoxin	Dictyoquinazol B		PA(20:1(11Z)/0:0)
Deserpidine	PC(P-16:0/15:1(9Z))	De-O-methylsimmondsin		Scriptaid	Didesmethylloperamide		PA(20:1(11Z)/22:6(4Z,7Z,10Z,13Z,16Z,19Z))
Desethylene-N-acetylnorfloxacin	PC(P-16:0/2:0)	Deoxyinosine		Ser Asn Asn	Didesmethyltrimeprazine		PA(20:2(11Z,14Z)/12:0)
Desethyl-N-acetylprocainamide	PC(P-20:0/16:0)	Deoxypumiloside		Silafluofen	Diethyl malonate		PA(20:3(8Z,11Z,14Z)/19:0)
Desmethylastemizole	PC(P-20:0/21:0)	Deoxysappanone B Trimethyl Ether		SM(d18:0/15:0)	Diethylthiophosphate		PA(20:4(5Z,8Z,11Z,14Z)/13:0)
Desmethyldehydroamlodipine	p-Chlorobenzenesulfonylurea	Derricin		SM(d18:0/16:0)	digitogenin		PA(21:0/12:0)
Desmethylhalofantrine	PE(10:0/11:0)[U]	Desacetylvinblastine		SM(d18:0/22:0)	Dihomomethionine		PA(21:0/13:0)
Desmethylmianserin	PE(18:0/10:0)	Desmethylergometrine		SM(d18:0/24:0)	Dihydro-7-Desacetyldeoxygedunin		PA(22:0/22:6(4Z,7Z,10Z,13Z,16Z,19Z))
Desmethylpirenzepine	PE(18:1(9Z)/13:0)	Desmethylflumazenil acid (Ro 15-6877)		Sophoraisoflavanone C	Dihydrodeoxygedunin		PA(22:2(13Z,16Z)/16:1(9Z))
Desmethylsufentanil	PE(18:3(6Z,9Z,12Z)/22:6(4Z,7Z,10Z,13Z,16Z,19Z))	Desmethylhalofantrine		Sphingofungin C	Dihydromethanophenazine		PA(22:4(7Z,10Z,13Z,16Z)/17:1(9Z))
Desmethyltrimipramine glucuronide	PE(19:0/18:3(9Z,12Z,15Z))	Desmethylpirenzepine		Spiredine	Dihydromilletenone methyl ether		PA(22:6(4Z,7Z,10Z,13Z,16Z,19Z)/14:1(9Z))
Desmosterol(d6)	PE(20:1(11Z)/24:1(15Z))	Desmethylsufentanil		Sporidesmolide I	Dihydroorotic acid		PA(22:6(4Z,7Z,10Z,13Z,16Z,19Z)/16:1(9Z))
Deuteroporphyrin IX	PE(21:0/19:0)[U]	Desmosterol(d6)		Squamocin L	Dihydropicromycin		PA(22:6(4Z,7Z,10Z,13Z,16Z,19Z)/20:3(8Z,11Z,14Z))
Dexpanthenol	PE(21:0/19:1(9Z))	Deuteroporphyrin IX		Staphyloxanthin	dihydroxy-fumaric acid		PA(O-16:0/21:0)
Dextromoramide M1	PE(22:1(11Z)/18:2(9Z,12Z))	Dexpanthenol		Stepronin	Dihydrozeatin riboside		PA(O-18:0/13:0)
Dextromoramide M2	PE(22:6(4Z,7Z,10Z,13Z,16Z,19Z)/24:1(15Z))	Dexrazoxane		Sulfamethoxazole	Dilauryl 3,3'-thiodipropionate		PA(O-18:0/22:4(7Z,10Z,13Z,16Z))
DG(13:0/22:6(4Z,7Z,10Z,13Z,16Z,19Z)/0:0)[iso2]	PE(24:0/20:3(5Z,8Z,11Z))	Dextromoramide M1		Synaptolepis factor K1	Dimefox		PA(P-16:0/14:1(9Z))
DG(14:1(9Z)/18:4(6Z,9Z,12Z,15Z)/0:0)	PE(6:0/6:0)	Dextrorphan sulfate		tadalafil	Dimepiperate		PA(P-16:0/22:6(4Z,7Z,10Z,13Z,16Z,19Z))
DG(15:0/14:1(9Z)/0:0)	PE(9:0/11:0)[U]	DG(13:0/22:6(4Z,7Z,10Z,13Z,16Z,19Z)/0:0)[iso2]		Tafluprost	Dimethicone		PA(P-20:0/15:1(9Z))
DG(15:1(9Z)/22:6(4Z,7Z,10Z,13Z,16Z,19Z)/0:0)[iso2]	PE(O-20:0/19:0)	DG(14:0/14:0/0:0)		Teinemine	Dimethipin		PA(P-20:0/16:1(9Z))
DG(16:0e/18:0/0:0)	PE(O-20:0/22:2(13Z,16Z))	DG(14:0/15:0/0:0)		Temozolomide	Dimethylcaffeic Acid		PA(P-20:0/22:6(4Z,7Z,10Z,13Z,16Z,19Z))
DG(16:1(9Z)/0:0/16:1(9Z)) (d5)	PE(O-20:0/22:6(4Z,7Z,10Z,13Z,16Z,19Z))	DG(14:1(9Z)/18:4(6Z,9Z,12Z,15Z)/0:0)		Terbutryn	Diosbulbin H		Palmitoleyl linolenate
DG(17:1(9Z)/18:1(9Z)/0:0)	PE(P-16:0/17:0)	DG(16:0e/18:0/0:0)		Tetranactin	Dioscoretine		Panatellin
DG(17:1(9Z)/22:6(4Z,7Z,10Z,13Z,16Z,19Z)/0:0)[iso2]	PE(P-20:0/0:0)	DG(16:1(9Z)/0:0/16:1(9Z)) (d5)		TG(12:0/18:3(9Z,12Z,15Z)/18:4(6Z,9Z,12Z,15Z))[iso6]	Diphenoxylate		Panaxydol linoleate
DG(17:2(9Z,12Z)/22:4(7Z,10Z,13Z,16Z)/0:0)[iso2]	PE(P-20:0/15:1(9Z))	DG(17:1(9Z)/18:1(9Z)/0:0)		TG(13:0/14:1(9Z)/17:0)[iso6]	Diphenylmethylphosphine oxide		Pancuronium
DG(18:0/0:0/18:0) (d5)	PE(P-20:0/18:2(9Z,12Z))	DG(17:2(9Z,12Z)/22:4(7Z,10Z,13Z,16Z)/0:0)[iso2]		TG(13:0/20:4(5Z,8Z,11Z,14Z)/22:6(4Z,7Z,10Z,13Z,16Z,19Z))[iso6]	Diphenylphosphine Acid		Pandamine
DG(18:4(6Z,9Z,12Z,15Z)/18:2(9Z,12Z)/0:0)	PE-Cer(d16:1(4E)/19:0)	DG(18:0/0:0/18:0) (d5)		TG(14:1(9Z)/15:1(9Z)/17:2(9Z,12Z))[iso6]	Dipiperamide A		Pantetheine
DG(18:4(6Z,9Z,12Z,15Z)/20:5(5Z,8Z,11Z,14Z,17Z)/0:0)	PE-Cer(d16:2(4E,6E)/16:0(2OH))	DG(19:0/22:1(13Z)/0:0)[iso2]		TG(15:0/16:0/18:3(6Z,9Z,12Z))[iso6]	Discadenine		PAPA NONOate
DG(19:0/22:1(13Z)/0:0)[iso2]	PE-Cer(d16:2(4E,6E)/18:1(9Z))	DG(19:1(9Z)/22:6(4Z,7Z,10Z,13Z,16Z,19Z)/0:0)[iso2]		TG(18:3(9Z,12Z,15Z)/18:3(9Z,12Z,15Z)/18:4(6Z,9Z,12Z,15Z))[iso3]	Disophenol		PC(0:0/6:0)
DG(19:1(9Z)/22:6(4Z,7Z,10Z,13Z,16Z,19Z)/0:0)[iso2]	Pectenotoxin 1	DG(20:0/18:1(11Z)/0:0)		Thalicarpine	Distichonic acid A		PC(10:0/17:0)[U]
DG(22:2(13Z,16Z)/18:1(9Z)/0:0)	Pelargonaldehyde	DG(22:2(13Z,16Z)/18:1(9Z)/0:0)		Thalicoside A	Disulfoton		PC(14:0/11:0)[U]
DG(22:2(13Z,16Z)/20:4(5Z,8Z,11Z,14Z)/0:0)	Pelargonidin 3-(6-(malonyl)glucoside)-7-(6-(4-(glucosyl)-p-hydroxybenzoyl)glucoside)	DG(22:2(13Z,16Z)/20:4(5Z,8Z,11Z,14Z)/0:0)		Thiocholesterol	Dithianon		PC(14:1(9Z)/22:6(4Z,7Z,10Z,13Z,16Z,19Z))
DG(22:6(4Z,7Z,10Z,13Z,16Z,19Z)/20:3(8Z,11Z,14Z)/0:0)	Pelargonidin 3-(6''-malonylglucoside)	DG(22:6(4Z,7Z,10Z,13Z,16Z,19Z)/20:3(8Z,11Z,14Z)/0:0)		Thioetheramide-PC	di-trans,poly-cis-undecaprenyl diphosphate		PC(16:0/15:1(9Z))
DG(22:6(4Z,7Z,10Z,13Z,16Z,19Z)/20:4(5Z,8Z,11Z,14Z)/0:0)	Penicilloate	DG(22:6(4Z,7Z,10Z,13Z,16Z,19Z)/22:6(4Z,7Z,10Z,13Z,16Z,19Z)/0:0)		Thr Asp Asp	DL-erythronic acid		PC(17:2(9Z,12Z)/17:2(9Z,12Z))
DG(24:0/16:1(9Z)/0:0)	PE-NMe(20:0/20:0)[U]	DG(24:0/16:1(9Z)/0:0)		Thr Lys Ala	D-Mycinose		PC(18:1(9Z)/4:0)
D-Glucosaminide	PE-NMe2(O-16:0/O-16:0)	D-Glucosaminide		Thymophthalein	Dolichoic acid-[18-20]		PC(18:3(9Z,12Z,15Z)/0:0)[U]
Di-2-propenyl pentasulfide	Pergolide sulfone	Diacetylaminoazotoluene		Tiagabine	Dolichyl b-D-glucosyl phosphate		PC(18:3(9Z,12Z,15Z)/18:3(9Z,12Z,15Z))
Diacetylfusarochromanone	Perindoprilat glucuronide	Diacetylfusarochromanone		Tolazamide	dolichyl beta-D-glucosyl phosphate		PC(18:4(6Z,9Z,12Z,15Z)/13:0)
Dialicor	PF-622	Dialicor		Torvanol A	Dolichyl phosphate D-mannose		PC(19:1(9Z)/18:0)
Diallat	PF-750	Diallat		Torvoside D	Dopamine 3-O-sulfate		PC(19:1(9Z)/22:2(13Z,16Z))
Diasarone 2	PG(12:0/14:1(9Z))	Dibenz[a,h]acridine		TPEN	Dorzolamide		PC(20:2(11Z,14Z)/13:0)
Dibenz[a,h]acridine	PG(13:0/22:4(7Z,10Z,13Z,16Z))	Dibutyl succinate		Tragopogonsaponin K	D-Pantetheine 4'-phosphate		PC(20:4(8Z,11Z,14Z,17Z)/20:4(8Z,11Z,14Z,17Z))
Diclobutrazol	PG(14:0/0:0)[U]	Dicaffeoylputrescine		Trandolapril	D-Threitol		PC(20:5(5Z,8Z,11Z,14Z,17Z)/18:4(6Z,9Z,12Z,15Z))
Dienochlor	PG(15:0/0:0)	Dicloralurea		trans-1,3,4,6,7,11b-Hexahydro-9-methoxy-2H-benzo[a]quinolizine-3-carboxylic acid ethyl ester	DU 122290		PC(22:2(13Z,16Z)/22:6(4Z,7Z,10Z,13Z,16Z,19Z))
Diethylpropion(metabolite VIII-glucuronide)	PG(18:0/15:0)	Diethylstilbestrol diphosphate		trans-2-Enoyl-OPC4-CoA	Dulciol A		PC(22:6(4Z,7Z,10Z,13Z,16Z,19Z)/20:3(8Z,11Z,14Z))
Diethylstilbestrol diphosphate	PG(18:3(6Z,9Z,12Z)/15:0)	Diethylthiophosphate		trans-2-trans-4-Nonadiene	Dyphylline		PC(23:0/11:0)[U]
Difenacoum	PG(19:1(9Z)/22:2(13Z,16Z))	Digallate		trans-Nonachlor	Ecabet		PC(7:0/O-8:0)
Diflorasone diacetate	PG(20:0/22:1(11Z))	Dihomomethionine		trans-Zeatin riboside	ecdysone palmitate		PC(9:0/17:0)[U]
Digallate	PG(20:2(11Z,14Z)/22:6(4Z,7Z,10Z,13Z,16Z,19Z))	Dihydro Isorescinnamine		Triadimenol	ECO 02301		PC(O-12:0/O-12:0)
Digitoxigenin	PG(20:4(5Z,8Z,11Z,14Z)/16:1(9Z))	Dihydroabietic acid		Tribromobisphenol A	EHNA		PC(O-16:0/1:0)
Dihomo-γ-Linolenic Acid	PG(22:0/0:0)	Dihydrocelastryl Diacetate		Tricin 7-[feruloyl-(->2)-glucuronyl-(1->2)-[glucuronyl-(1->3)]-glucuronide]	Eletriptan		PC(O-16:0/13:0)
Dihydro Isorescinnamine	PG(22:6(4Z,7Z,10Z,13Z,16Z,19Z)/20:5(5Z,8Z,11Z,14Z,17Z))	Dihydroorotic acid		Triethylenemelamine	Emodic Acid		PC(O-18:0/2:0)[S]
Dihydroabietic acid	PG(O-16:0/0:0)	Dihydropicromycin		Trigoneoside Xb	Endrin		PC(P-18:0/14:0)
Dihydrocelastryl Diacetate	PG(O-16:0/22:0)	dihydroxy-fumaric acid		Trimedlure	Enoxacin		PC(P-18:0/15:0)
Dihydroxyfumitremorgin C	PG(P-18:0/15:1(9Z))	Dihydroxymelphalan		Trimethaphan	Epidistenin		PC(P-18:0/17:0)
Dihydroxymelphalan	PG(P-18:0/17:2(9Z,12Z))	Dihydrozeatin		Trp Met	Epimedoside C		PC(P-19:1(12Z)/0:0)
Dihydroxytrazodone	PG(P-18:0/18:0)	Dihydrozeatin riboside		Trp Pro Met	Epitheaflavic acid 3'-gallate		PC(P-20:0/22:4(7Z,10Z,13Z,16Z))
Dihydrozeatin	PG(P-20:0/0:0)	Dilauryl 3,3'-thiodipropionate		Tuberoside	Epothilone C		PE(10:0/14:0)[U]
Diketospirilloxanthin/ 2,2'-Diketospirilloxanthin	PG(P-20:0/18:3(9Z,12Z,15Z))	Dimethamine		Tubulysin A	Epothilone D		PE(11:0/18:0)[U]
Dimethamine	PGF1α Alcohol	Dimethicone		Tubulysin D	Equol 7-O-glucuronide		PE(14:0/0:0)
Dimethindene	PGS	Dimethylallyl diphosphate (DMAPP)		Tulobuterol	Ergine		PE(14:0/P-16:0)
Dimethylallyl diphosphate (DMAPP)	Phe Glu Ser	Dimethylarsinous acid		Tyr Trp Glu	erythro-6,8-Pentatriacontanediol		PE(14:1(9Z)/P-16:0)
Diminazene	Phe Phe Tyr	Dimethylcaffeic Acid		Tyrosyl-Tyrosine	Erythrodiol 3-palmitate		PE(14:1(9Z)/P-18:1(11Z))
Dioctyltin isooctylthioglycolate	Phe Pro Asp	Dimethylmalonic acid		Tyr-Tyr-OH	Erythromycin E		PE(18:1(9Z)/18:0)
Diosbulbinoside D	Phe Pro Thr	Diminazene		U-73122	Erythronolide B		PE(18:2(9Z,12Z)/22:6(4Z,7Z,10Z,13Z,16Z,19Z))
Dioscin	Phe Tyr Trp	Diosbulbin H		U-83836E	Eseroline		PE(18:3(9Z,12Z,15Z)/14:1(9Z))
Diospolysaponin A	Phenazocine	Diosbulbinoside D		Ubiquinone 8	Estradiol acetate		PE(18:4(6Z,9Z,12Z,15Z)/22:6(4Z,7Z,10Z,13Z,16Z,19Z))
Diphemanil Methylsulfate	Phenethyl rutinoside	Diphemanil Methylsulfate		URB597	Estradiol Benzoate		PE(19:0/14:0)
Diprenorphine	Phenylacetothiohydroximate	Diphenoxylic acid(DPA)		Uzarigenin 3-[xylosyl-(1->2)-rhamnoside]	Estrone 3-sulfate		PE(19:0/15:0)[U]
Disopyramide	PHOME	Discodermolide		Val Asn Arg	Etaconazole		PE(20:0/17:0)
di-trans,poly-cis-Octaprenyl diphosphate	PHOP	Disopyramide		Val His Ala	Ethalfluralin		PE(20:3(5Z,8Z,11Z)/15:0)
Divinylchlorophyll a	p-Hydroxyphenylbutazone	Distichonic acid A		Val Tyr Ser	Ethenodeoxyadenosine		PE(20:4(5Z,8Z,11Z,14Z)/20:1(11Z))
dl-alpha-Tocopherol nicotinate	Phylloquinone	Disulfoton		Val Val Pro	Ethyl cellulose		PE(20:5(5Z,8Z,11Z,14Z,17Z)/19:0)
DMABA-d6 NHS ester	PI(12:0/0:0)	Dithianon		Valechlorin	Ethyl menthane carboxamide		PE(22:0/22:0)[U]
D-Mannitol	PI(14:1(9Z)/13:0)	dl-alpha-Tocopherol nicotinate		Valnemulin	Ethynodiol diacetate		PE(22:1(11Z)/22:6(4Z,7Z,10Z,13Z,16Z,19Z))
Docosanediol-1,14-disulfate	PI(18:0/16:1(9Z))	DL-erythronic acid		Vincanin B	Etonogestrel		PE(22:2(13Z,16Z)/19:0)
Dodeca-2(e),4(e)-dienoic acid isobutylamide	PI(18:2(9Z,12Z)/0:0)	D-Mycinose		Vinpocetine	Eupachlorin		PE(22:4(7Z,10Z,13Z,16Z)/17:2(9Z,12Z))
Dodecaprenyl diphosphate	PI(18:2(9Z,12Z)/13:0)	Docosanediol-1,14-disulfate		Vitamin K2	Eutypine		PE(22:4(7Z,10Z,13Z,16Z)/22:6(4Z,7Z,10Z,13Z,16Z,19Z))
dodecyl decanoate	PI(20:0/12:0)	Dodeca-2(e),4(e)-dienoic acid isobutylamide		WSP-1	Evoxine		PE(24:0/22:2(13Z,16Z))
Dofetilide	PI(22:4(7Z,10Z,13Z,16Z)/22:0)	Dodecaprenyl diphosphate		Xanthine-8-carboxylate	Famciclovir		PE(9:0/9:0)[U]
Dolastatin 10	PI(P-18:0/17:2(9Z,12Z))	Dofetilide		Xanthopterin-B2	Farnesal		PE(O-18:0/0:0)
dolichyl D-xylosyl phosphates	PI(P-20:0/20:1(11Z))	dolichyl beta-D-glucosyl phosphate		XE991	Farnesyl Thiosalicylic Acid Amide		PE(O-18:0/12:0)
Domesticoside	PI-Cer(d20:0/18:0)	Domesticoside		xi-Anomuricine	Fasciculic acid C		PE(P-16:0/0:0)
Donhexocin	PI-Cer(t18:0/16:0(2OH))	Dopamine 3-O-sulfate		Xylopinine	Fasciculol C		PE(P-16:0/12:0)
D-Pantethine	Pikromycin	Dorzolamide		α-Aminodiphenylacetic acid	Fasciculol E		PE(P-16:0/18:4(6Z,9Z,12Z,15Z))
D-Ribose 1-diphosphate	Pinusolide	dTDP-D-galacturonate			Fenbuconazole		PE(P-18:1(11Z)/15:0)
dTDP-D-galacturonate	Piperettine	D-Threitol			Fenpyroximate		PE(P-18:1(9Z)/20:4(8Z,11Z,14Z,17Z))
D-threo-3-Methylmalate	Piscerythramine	D-threo-3-Methylmalate			Feruloyl-2-hydroxyputrescine		PE(P-19:1(12Z)/0:0)
DTP	podocarpic acid	Dukunolide E			Feruloylcholine		PE(P-20:0/15:0)
Dukunolide E	Polysorbate 60	Ecabet			Fisetinidol-4beta-ol 3,4,7,3',4'-pentamethyl ether		PE(P-20:0/18:3(9Z,12Z,15Z))
E3040	Pondaplin	ECO 02301			Flamprop		PE-Cer(d14:1(4E)/22:1(13Z)(2OH))
E-3179	Poppy acid	Edetate			Flavidulol C		PE-Cer(d14:2(4E,6E)/18:1(9Z))
Edetate	poriferast-5-en-3β-ol	Elesclomol			Fludiazepam		PE-Cer(d14:2(4E,6E)/25:0)
Eflornithine	PPA(18:1(9Z)/18:1(9Z))	Enalapril			Fluenetil		Pefloxacine
Elesclomol	Pristimerin	Endomorphin-1			Flumazenil		Pelargonidin 3-(6''-p-coumarylglucoside)-5-(6'''-acetylglucoside)
Enalapril	Pro Ala Glu	Endrin			Flunarizine 4-oxide		Pelargonidin 3-(6''-p-coumarylsambubioside)-5-(6'''-malonylglucoside)
endo-1,4-beta-Xylanase	Pro Asp	Enniatin B			Flupenthixol sulfoxide		Pelargonidin 3-rhamnoside
Endomorphin-1	Pro Cys Met	Eosin			Fluphenazine		Penbutolol
Enniatin B	Pro Gly His	E-Phenylitaconyl-CoA			Flupoxam		Penbutolol glucuronide
Enniatin B4	Pro Met Gly	Epicatechin 3-O-gallate-(4beta->6)-epicatechin 3-O-gallate-(4beta->8)-epicatechin 3-O-gallate			Fluprostenol isopropyl ester		PE-NMe(O-16:0/O-16:0)
Ensulizole	Pro Phe Phe	Epicoprosterol			Fluprostenol serinol amide		Pentachloroethane
Entacapone	Pro Pro Phe	Epigallocatechin 3-O-cinnamate			Fluprostenol-d4		Pentafluorobenzenesulfonyl fluorescein
E-Phenylitaconyl-CoA	Pro Ser Ala	Epimedoside C			Fluthiacet-methyl		Pepstatin
Epiafzelechin Trimethyl Ether	Proscillaridin A	Epothilone D			FMC-5(d18:1/18:0)		Perindopril lactam
Epicatechin 3-O-gallate-(4beta->6)-epicatechin 3-O-gallate-(4beta->8)-epicatechin 3-O-gallate	Prostaglandin F2a-d9	Equol 7-O-glucuronide			Forasartan		Petalostetin
Epicoprosterol	Protoanemonin	Ergine			Formylfusarochromanone		Petunidin 3-(6''-acetylglucoside)
Epigallocatechin 3-O-cinnamate	PS(12:0/16:1(9Z))	Erythro-Bupropion			Formylisoglutamine		PG(17:2(9Z,12Z)/15:0)
Epothilone A	PS(15:0/22:6(4Z,7Z,10Z,13Z,16Z,19Z))	Erythrodiol 3-decanoate			Fortimicin AP		PG(18:3(6Z,9Z,12Z)/17:0)
Epothilone B	PS(15:1(9Z)/0:0)	Erythromycin E			FTY720 phenoxy-biotin		PG(18:4(6Z,9Z,12Z,15Z)/18:4(6Z,9Z,12Z,15Z))
Epoxomicin	PS(18:3(9Z,12Z,15Z)/18:0)	Eseridine			Fumitremorgin C		PG(18:4(6Z,9Z,12Z,15Z)/20:0)
Epoxyanethole	PS(19:1(9Z)/13:0)	Estradiol Benzoate			Fumonisin FP3		PG(19:0/12:0)
Eremopetasitenin C3	PS(20:2(11Z,14Z)/0:0)	Estriol 3-sulfate 16-glucuronide			Furafylline		PG(19:0/22:6(4Z,7Z,10Z,13Z,16Z,19Z))
Ergoline-8-methanol, 10-methoxy-6-methyl-, (8b)-	PS(21:0/13:0)	Estrone 3-sulfate			Furfuryl propyl disulfide		PG(20:0/18:3(9Z,12Z,15Z))
Erinapyrone B	PS(22:6(4Z,7Z,10Z,13Z,16Z,19Z)/22:0)	Etacelasil			G-418		PG(21:0/17:0)
erythro-7,9-Hexatriacontanediol	PS(O-20:0/22:4(7Z,10Z,13Z,16Z))	Ethalfluralin			GA		PG(22:1(11Z)/0:0)
Erythro-Bupropion	PS(P-16:0/14:1(9Z))	Ethionamide sulfoxide			Galactan		PG(22:1(11Z)/14:0)
Erythrodiol 3-decanoate	PS(P-16:0/20:5(5Z,8Z,11Z,14Z,17Z))	Ethyl 18-bromo-8E,17E19Z-tricosatrien-4,6-diynoate			Galbeta1-4GlcNAcbeta1-3Galalpha1-3Galbeta1-4Glcbeta-Cer(d18:1/26:0)		PG(22:1(11Z)/14:1(9Z))
Erythroxanthin sulfate	PS(P-20:0/20:4(5Z,8Z,11Z,14Z))	Ethyl 18-bromooctadec-17-en-5,7,15-triynoate			GalCer(d18:0/24:0)		PG(22:4(7Z,10Z,13Z,16Z)/0:0)
Eseridine	PS(P-20:0/22:4(7Z,10Z,13Z,16Z))	Ethyl 2-Bromo-2-iodoacetate			Gallopamil		PG(22:4(7Z,10Z,13Z,16Z)/20:1(11Z))
Esmolol	Pseudaminic acid	Ethyl 3-[(2-furanylmethyl)thio]propanoate			Galβ1-3GalNAcα-Thr		PG(22:4(7Z,10Z,13Z,16Z)/20:3(8Z,11Z,14Z))
Estriol 3-sulfate 16-glucuronide	Pseudoargiopinin III	Ethyl 7-epi-12-hydroxyjasmonate glucoside			Gambirtannine		PG(22:6(4Z,7Z,10Z,13Z,16Z,19Z)/0:0)
Etacelasil	Pseudomonine	Etonogestrel			gamma2-Solamarine		PG(22:6(4Z,7Z,10Z,13Z,16Z,19Z)/14:0)
Ethionamide sulfoxide	Pulverochromenol	Euchrenone a15			Gamma-Glu-Leu		PG(22:6(4Z,7Z,10Z,13Z,16Z,19Z)/21:0)
Ethopropazine	punaglandin 2	Eupachlorin acetate			gamma-Glutamyl-beta-(isoxazolin-5-on-2-yl)alanine		PG(O-16:0/19:1(9Z))
Ethyl 18-bromo-8E,17E19Z-tricosatrien-4,6-diynoate	Pyraclofos	Euphorbia factor Ti2			gamma-Glutamyl-S-methylcysteine sulfoxide		PG(O-18:0/22:2(13Z,16Z))
Ethyl 18-bromooctadec-17-en-5,7,15-triynoate	Pyributicarb	Exserohilone			gamma-Tocopheryl quinone		PG(O-20:0/0:0)
Ethyl 2-Bromo-2-iodoacetate	Pyridoxal Phosphate	Ezetimibe			Gancaonin I		PG(P-16:0/17:2(9Z,12Z))
Ethyl 3-(N-butylacetamido)propionate	Pyrrhoxanthinol	Faradiol laurate			Ganoderic acid Mc		PG(P-16:0/18:2(9Z,12Z))
Ethyl 7-epi-12-hydroxyjasmonate glucoside	Quadranguloside	Faradiol myristate			Ganoderiol I		PG(P-20:0/17:2(9Z,12Z))
Etioporphyrin III	Quinacrine	Farnesylcysteine			Ganodermanontriol		PG(P-20:0/22:2(13Z,16Z))
Euchrestaflavanone A	R207910	Fasciculol C			Ganolucidic acid B		PG(P-20:0/22:4(7Z,10Z,13Z,16Z))
Eupachlorin acetate	Ramipril	Fenirofibrate glucuronide			Garcinone A		Phe Arg Gly
Euphorbia factor Ti2	Rasagiline	Fenpyroximate			Gatifloxacin		Phe Gln Phe
Everolimus	Resorufin	Ferroxamine			Gentamicin C1a		Phe Trp Asp
Exiguaflavanone D	Rhamnocitrin 3-glucoside-4'-(3''-dihydrophaseoylglucoside)	Feruloyl-2-hydroxyputrescine			Gibberellin A17		Phe Trp Val
Exserohilone	Rhapontin	Fesoterodine			Gibberellin A7		Phenthoate
Ezetimibe	Roxarsone	Fisetinidol-4beta-ol 3,4,7,3',4'-pentamethyl ether			Gingerenone A		Phorbol 12-tiglate 13-decanoate
F-Amidine	Rubraflavone D	FK-409			Gingerglycolipid C		Phosphatidylinositol-3,4,5-trisphosphate
Famoxadone	Salannin	Flamprop			Glabrin C		Phosphoenol-4-deoxy-3-tetrulosonate
famprofazone	Sarothralin	Flemistrictin C			Glaucarubinone		Phospho-L-serine
Faradiol laurate	SB 228357	Fluazinam			Glaucarubolone 15-O-beta-D-glucopyranoside		Phthalazinone pyrazole
Faradiol myristate	SB 431542	Fludarabine phosphate			GlcCer(d14:1/18:0)		Phyllalbine
Farnesylcysteine	Secobarbital	Fludiazepam			GlcCer(d15:1/20:0)		Physapruin B
Fenirofibrate glucuronide	Ser Ala Glu	Flumazenil			GlcCer(d15:2(4E,6E)/20:0)		Phytosphingosine 1-phosphate
Fenofibrate	Ser Asn Asn	Flumethasone pivalate			GlcCer(d16:1(4E)/22:0(2OH))		PI(14:1(9Z)/14:1(9Z))
Fenoxaprop-ethyl	Ser Phe Phe	Fluoxymesterone			GlcCer(d16:2(4E,6E)/24:0(2OH))		PI(18:4(6Z,9Z,12Z,15Z)/0:0)
Ferroxamine	Ser Pro Asn	Flupenthixol sulfoxide			GlcCer(d18:2/16:0)		PI(18:4(6Z,9Z,12Z,15Z)/16:1(9Z))
Fevicordin B 2-gentiobioside	Ser Val Val	Fluphenazine			Glibornuride M6a		PI(20:1(11Z)/17:0)
Fexaramine	Serinyl-Lysine	Fluprostenol methyl ester			Gliclazide		PI(21:0/15:0)
Fexofenadine	Sertindole	Fluprostenol-d4			Glimepiride		PI(22:0/0:0)
Filipin III	Sevoflurane	Fluvastatin			Gln Ala Arg		PI(22:0/21:0)
Fisetin 7,3',4'-trimethyl ether	Simonin I	Folpet			Gln Asp Cys		PI(22:0/22:0)
FK-409	Simvastatin-6'-carboxylic acid	Fortimicin AP			Gln Glu Cys		PI(22:2(13Z,16Z)/22:0)
FKGK 11	Sinapine	Fortimicin FU-10			Gln Glu Lys		PI(22:6(4Z,7Z,10Z,13Z,16Z,19Z)/12:0)
Flavoxate	Sinapoyl malate	Frovatriptan			Gln Glu Phe		PI(P-16:0/17:2(9Z,12Z))
Flemistrictin C	S-Inosyl-L-homocysteine	Fulvinervin B			Gln Lys Asn		PI(P-18:0/18:0)
Floribundine	S-Japonin	Furafylline			Gln Lys Tyr		PI(P-20:0/0:0)
Fluazinam	S-Methyl hexanethioate	Furaneol 4-(6-malonylglucoside)			Gln Phe Tyr		PI(P-20:0/17:0)
Fluconazole glucuronide	Solacapine	Furfuryl propyl disulfide			Glu Gln Asp		PI(P-20:0/21:0)
Fludarabine phosphate	Solanidine	Furo[3,4-b]pyridine-3-carboxylic acid, 5,7-dihydro-2-methyl-4-(2-nitrophenyl)-5-oxo-, methyl ester			Glu Glu Pro		PI(P-20:0/22:0)
Flumazenil acid	Sophoraisoflavanone C	Furodysinin			Glu His Trp		pibutidine
Flumethasone pivalate	Spermine NONOate	Gabapentin			Glu Pro Gln		Pilocereine
Fluoxymesterone	Spinosyn D	Galactosylglycerol			Glucosyl passiflorate		Pimozide
Folpet	Sporidesmolide I	Galbeta1-3Galbeta1-4GlcNAcbeta1-3Galbeta1-4Glcbeta-Cer(d18:1/26:1(17Z))			Glucosylisomaltol		Polyporusterone A
Fortimicin FU-10	SQ 26180	Galbeta-Cer(d18:1/24:1(15Z))			Glutathionylspermine		Polysorbate 20
Frovatriptan	SQDG(22:5(5Z,8Z,11Z,14Z,17Z)/16:1(13Z))	GalCer(d18:0/24:0)			Gly Arg Asp		Pravadoline
Fructoselysine	streptothricin F acid	Gambogic Acid Amide			Gly Asn Gly		Precorrin 3A
Fulvinervin B	SU 5416	Gamma-Glu-Leu			Gly Asn Met		Pregna-5,16,20-triene-3beta,20-diol diacetate
Fumonisin A1	Sulfamethoxazole glucuronide	gamma-Glutamyl-S-methylcysteine sulfoxide			Gly His Phe		Premithramycin A3
Furamizole	Sulfasalazine	Ganciclovir			Gly Phe Glu		Prilocaine
Furaneol 4-(6-malonylglucoside)	Sulfociprofloxacin	Ganglioside GM2 (d18:0/24:1(15Z))			Gly Pro Val		Pro Leu
Furo[3,4-b]pyridine-3-carboxylic acid, 5,7-dihydro-2-methyl-4-(2-nitrophenyl)-5-oxo-, methyl ester	Sulindac sulfide glucuronide	Ganoderic acid I			Glycerol 1-propanoate diacetate		Pro Leu His
Furodysinin	Taurolithocholic acid 3-glucuronide	Ganoderic acid Ma			Glycocholic acid 3-glucuronide		Pro Lys Arg
Gabunamine	Taxa-4(20),11(12)-dien-5α-yl acetate	Ganoderic acid Mg			Glycopyrrolate		Promazine N-oxide sulfoxide
Galactosylglycerol	Taxol C	Ganoderiol I			Glycosminine		Propargite
Galbeta1-3Galbeta1-4GlcNAcbeta1-3Galbeta1-4Glcbeta-Cer(d18:1/26:1(17Z))	Tazarotene	Ganolucidic acid B			Glycyl-Glutamate		Propylene glycol mono- and diesters of fats and fatty acids
Galbeta-Cer(d18:1/24:1(15Z))	Teinemine	Garcimangosone A			Gly-His-OH		Protionamide
GalCer(d18:2/21:0)	Tephrowatsin B	Gatifloxacin			Gnididilatin		Protoleucomelone
Gambogic Acid Amide	Terazosin	Geddyl alcohol			Gravacridonetriol		PS(14:1(9Z)/14:1(9Z))
gamma-carboxyglutamic acid	Terbutryn	Geldanamycin Analog			GW 1929		PS(17:0/12:0)
Ganciclovir	tetracosanal	Geniposide			GW 6471		PS(17:1(9Z)/12:0)
Gangetinin	tetracosatetraenoic acid n-6	Gentamicin A			GW 7647		PS(18:1(9Z)/17:1(9Z))
Ganglioside GM2 (d18:0/24:1(15Z))	Tetrahydrocortisone	Gentiocyanin A			GYKI 52895		PS(18:2(9Z,12Z)/0:0)
Ganglioside GT3 (d18:1/12:0)	Tetrahydrocurcumin	Gestodene			H-1152		PS(18:3(6Z,9Z,12Z)/16:0)
Ganoderic acid I	Tetrahymanol	Gingerenone A			Haematopodin		PS(19:0/22:1(11Z))
Ganoderic acid Mg	Tfa-VAL-TYR-VAL-OH	Gingerglycolipid C			Halofuginone		PS(19:0/22:2(13Z,16Z))
GANT 61	TG(10:0/10:0/10:0)	Ginsenoside Rh5			Haloprogin		PS(20:0/14:1(9Z))
Garcimangosone A	TG(12:0/12:0/18:4(6Z,9Z,12Z,15Z))[iso3]	Ginsenoyne B			HAMI3379		PS(20:2(11Z,14Z)/18:3(6Z,9Z,12Z))
Gardoside	TG(12:0/12:0/20:5(5Z,8Z,11Z,14Z,17Z))[iso3]	Glabrin C			Harrisonin		PS(20:4(5Z,8Z,11Z,14Z)/17:1(9Z))
Geddyl alcohol	TG(14:1(9Z)/17:1(9Z)/20:5(5Z,8Z,11Z,14Z,17Z))[iso6]	Glaucarubinone			Heneicosanol		PS(20:5(5Z,8Z,11Z,14Z,17Z)/14:1(9Z))
Gemichalcone B	TG(15:1(9Z)/16:1(9Z)/22:5(7Z,10Z,13Z,16Z,19Z))[iso6]	GlcCer(d14:1(4E)/24:1(15Z)(2OH))			HEPC		PS(22:1(11Z)/0:0)
Genipinic acid	TG(16:1(9Z)/16:1(9Z)/17:2(9Z,12Z))[iso3]	GlcCer(d14:2(4E,6E)/20:0(2OH))			Heptadecan-2-ol		PS(22:1(11Z)/20:2(11Z,14Z))
Geniposide	TG(18:3(6Z,9Z,12Z)/20:4(5Z,8Z,11Z,14Z)/20:4(5Z,8Z,11Z,14Z))[iso3]	GlcCer(d16:2(4E,6E)/20:0(2OH))			Heptadecanoyl Ethanolamide		PS(22:1(11Z)/21:0)
Gentamicin	TG(22:6(4Z,7Z,10Z,13Z,16Z,19Z)/20:5(5Z,8Z,11Z,14Z,17Z)/22:6(4Z,7Z,10Z,13Z,16Z,19Z))[iso3]	GlcCer(d16:2(4E,6E)/24:0(2OH))			Hericene A		PS(22:2(13Z,16Z)/0:0)
Gentamicin A	Thalicoside A	GlcCer(d18:0/18:0)			Hesperaline		PS(22:2(13Z,16Z)/22:1(11Z))
Gentiocyanin A	Thaumatin b, recombinant	GlcCer(d18:2/16:0)			Hesperetin 7-O-rhamnoside		PS(22:6(4Z,7Z,10Z,13Z,16Z,19Z)/20:4(5Z,8Z,11Z,14Z))
Gibberellin A98	Thiamine acetic acid	Glenvastatin			hexamethylene bisacetamide		PS(O-16:0/12:0)
Ginsenoside La	Thifluzamide	Gln Ala Arg			Hexyl nonanoate		PS(O-16:0/13:0)
Ginsenoside Rg3	Thiocarbohydrazide	Gln Asp Cys			His Asn His		PS(O-16:0/14:1(9Z))
Ginsenoside Rh5	Thiolactomycin	Gln Glu Cys			His Asp Gln		PS(O-16:0/16:0)
Ginsenoyne B	Thiourocanic acid	Gln Glu Glu			His Cys Asp		PS(O-18:0/22:2(13Z,16Z))
GlcCer(d14:1(4E)/24:1(15Z)(2OH))	Thr Arg Cys	Gln Lys Thr			His Gly Gln		PS(O-20:0/20:0)
GlcCer(d14:2(4E,6E)/20:0(2OH))	Thr Asp Asp	Gln Phe Ala			His Gly His		PS(P-16:0/15:1(9Z))
GlcCer(d16:2(4E,6E)/20:0(2OH))	Thr Gln Ser	Glu Asn Arg			His His Phe		PS(P-16:0/18:2(9Z,12Z))
GlcCer(d18:0/18:0)	Thr His Ala	Glu His Trp			His Lys Ser		PS(P-18:0/13:0)
GlcCer(d18:2/20:1)	Thr Lys Glu	Glu Lys Met			His Met		PS(P-20:0/12:0)
Glenvastatin	Thr Met Arg	Glu Lys Trp			His Met Pro		PS(P-20:0/20:0)
Gln Gln Met	Thr Met Leu	Glu Met Asn			His Met Val		Pteroyltriglutamic acid
Gln Gln Phe	Thymophthalein	Glu Phe Phe			His Ser Ser		Pyrantel
Gln Glu Glu	Ticagrelor	Glu Pro Gln			His Thr Asn		pyronaridine
Gln His His	Tocophersolan	Glu Thr			His Thr Gly		Pyrophaeophorbide a
Gln His Thr	Tolazamide	Glu Trp Asp			His Trp		Pyropheophytin b
Gln Leu Arg	Topaquinone	Glucocheirolin			His Trp Trp		Quadrigemine A
Gln Lys Thr	Torosaflavone B	Glucoscilliroside			His Val Gln		Quercetin 3-(2''-sinapoylglucoside)-3'-(6''-sinapoylglucoside)-4'-glucoside
Gln Phe Ala	trans-1,4-bis(2-Chlorobenzaminomethyl)cyclohexane	Glucosyl passiflorate			His-TyrMe-OH		Raloxifene
Glu His His	Trans-4-Hydroxy-L-proline	Glutamyl-Glutamate			Homaline		Ramipril glucuronide
Glu Lys Met	trans-Geranylgeranylbixin	Glutathionylspermidine			Homodihydrocapsaicin		Raucaffricine
Glu Lys Trp	trans-Zeatin riboside	Glutathionylspermine			Homostachydrine		Red chlorophyll catabolite
Glu Met Asn	Triamcinolone hexacetonide	Gly Asp Asp			Honokiol		Reduced coenzyme F420
Glu Phe Phe	Tricetin 7,3'-diglucuronide	Gly Gly Glu			Hordatine B		Retusoquinone
Glu Thr	Trifluoromethylphenylpropanediol	Gly His Met			HPF		Rhodamine 6G
Glu Trp Asp	Trilobolide	Gly His Ser			HQL-79		Robustadial A
Glucocheirolin	Trimethoprim 1-N-oxide	Gly Lys			Huratoxin		Robustocin
Glucoscilliroside	Tris(2-methyl-1-aziridinyl)phosphine oxide	Gly Pro Val			Hycanthone		Rosmarinine
Glutamyl-Glutamate	Trisjuglone	Gly Ser Gln			Hydrogenobyrinate		Rotigotine
Glutathionylspermidine	Trithionic acid	Gly Thr Cys			Hydroxymelphalan		Rufloxacin
Gly Arg Ala	Trp Gln Arg	Glycerol 2-(9Z,12Z-octadecadienoate) 1-hexadecanoate 3-O-[alpha-D-galactopyranosyl-(1->6)-beta-D-galactopyranoside]			Hypoglycin B		S-aminomethyldihydrolipoamide
Gly Asp Asp	Trp Leu Leu	Glycinoeclepin B			Hypoxanthine		Sarsaparilloside
Gly Gln Asn	Tsangane L 3-glucoside	Glycobismine A			Idebenone Metabolite (QS-4)		Schleicherastatin 5
Gly Glu Asn	Tyr Gln Leu	Glycocholic acid 3-glucuronide			Ile Cys Gln		Scorzoside
Gly Gly Arg	TyrMe-Leu-OH	Glycosyl-4,4'-diaponeurosporenoate			Ile Phe		Sebacic acid
Gly Gly Glu	U-83836E	Glymidine			Ile-Met-OH		Secaloside A
Gly His Met	UDP-3-ketoglucose	Gossypol			Ilexolide A		Selenomethionine
Gly His Ser	Unoprostone isopropyl ester	Gravacridonetriol			Imazaquin		Sempervirenoside A
Gly Lys	Uracil	GS 1500			Immunomycin		Ser Ile His
Gly Ser Gln	Val Asn	GSK264220A			Indoramin		Ser Pro Asp
Gly Thr Cys	Val Asn Gln	Guanidinoethyl methyl phosphate			Inositol cyclic phosphate		Ser Thr Tyr
Gly Trp	Val Gln Arg	GW 0791			Ins-1-P-Cer(d18:1/22:0)		Serratine
Glyburide	Val Gln Pro	GW 4064			Integerrenine		S-Furanopetasitin
Glycerol	Val Lys Asn	GW 627368X			Integerrine		SM(d16:0/20:0)
Glycerophospho-N-Arachidonoyl Ethanolamine	Val Pro His	GW 6471			Inulicin		SM(d16:1/22:1)
Glycobismine A	Val Tyr Glu	Haematopodin			Iopanoic acid		SM(d18:0/12:0)
Glycosyl-4,4'-diaponeurosporenoate	Val Tyr Gly	Haginin B			Ipecac (Protoemetine)		SM(d18:0/14:0)
Glymidine	Valechlorin	Halacrinate			Ipratropium		SM(d18:0/16:0)
Gly-Nap-OH	Valrubicin	Hallactone B			Irbesartan		SM(d18:0/22:0)
Goshonoside F1	Vanillic acid	Hamilcone			Irinotecan		SM(d18:2/22:1)
Gossypetin 8-glucuronide	Variabiloside D	Harderoporphyrin			Isatin		SM(d18:2/24:1)
Gossypol	VD 2716	Hebevinoside VIII			isepamicin		Solanine
Goyaglycoside g	Vicenistatin	Hectochlorin			Ismine		Sorbitan oleate
Graveolinine	Vinaginsenoside R1	Heliantriol B2			iso-1,2-octadecanediol		Sorbitan palmitate
Griseofulvin	Violastyrene	Hemibrevetoxin B			Isobavachromene		Soyasapogenol C
GS 1500	Voglibose	Hemine			Isobenzan		Spergualin
GSK264220A	Withaphysacarpin	Heneicosanol			Isodiospyrin		Sphingofungin C
Guanidinoethyl methyl phosphate	WSP-1	Heptadecan-2-ol			Isoeugenol formate		Spinosyn A
Guanosine	Xanomeline	Heptadecanoyl carnitine			Isoflavone 7-O-beta-D-glucoside		Spiramycin 2
Guanosine 3'-diphosphate 5'-triphosphate	Xanthoangelol F	Heptanoyl thio-PC			Isopentenyladenine-9-N-glucoside		Spirosolane skeleton
GW 0791	xi-Anomuricine	Hericenone B			Isopentyl beta-D-glucoside		SQDG(16:0/14:0)
GW 4064	Ximenic acid	Hexacosanedioic acid			Isovaltrate		Squamocin L
GW 4869	Yucalexin P8	Hexadecanoic acid, 2,2-difluoro-			Isovitexin		Stearyl myristoleate
GW 627368X	ZM 336372	Hexahomomethionine			Jamaicamide C		Steryl sulfate
GW 9578	Zymostenol-d7	Hexahydro-6,7-dihydroxy-5-(hydroxymethyl)-3-(2-hydroxyphenyl)-2H-pyrano[2,3-d]oxazol-2-one			Jangomolide		Stypandrol
Gymnemic acid I	α-Aminodiphenylacetic acid	His Arg Tyr			Janthitrem B		Styrene oxide
Haginin B	β Methasone valerate	His Asp Arg			Janthitrem C		SU 11652
Hallactone B		His Asp Asn			Junosine		Succinic anhydride
Halopemide		His Asp Gln			JWH 073 N-butanoic acid metabolite-d5		Succinylcholine
Hamilcone		His Cys Asp			JWH 210 N-(4-hydroxypentyl) metabolite		Sulfadoxine glucuronide
Harderoporphyrin		His Cys Gly			JWH 368		Sulindac
HC Red No. 3		His Gln Cys			JWH145		Synaptolepis factor K1
HC Yellow No. 4		His Gly Gln			JWH203-3 Chrophenyl isomer		Tafluprost
Hebevinoside III		His His Ala			Kabiramide C		Tangeraxanthin
Hebevinoside IX		His His Met			Kaempferol 3-(3'',4''-diacetylrhamnoside)		Telomestatin
Hebevinoside VIII		His Leu Asp			Kanzonol Z		Teprenone
Hectochlorin		His Met			Karatavegenin C		TG(12:0/12:0/22:6(4Z,7Z,10Z,13Z,16Z,19Z))[iso3]
Heliantriol B2		His Met Thr			Khivorin		TG(12:0/18:3(9Z,12Z,15Z)/18:4(6Z,9Z,12Z,15Z))[iso6]
Heliotrine		His Ser Ser			Kinetin-7-N-glucoside		TG(12:0/18:4(6Z,9Z,12Z,15Z)/20:5(5Z,8Z,11Z,14Z,17Z))[iso6]
Hemine		His Thr Asn			Kurilensoside H		TG(14:1(9Z)/14:1(9Z)/18:3(9Z,12Z,15Z))[iso3]
Heptadecanoyl carnitine		His Thr Gly			Kuwanon A		TG(14:1(9Z)/15:1(9Z)/17:2(9Z,12Z))[iso6]
Heptanoyl thio-PC		His Trp			Kynuramine		TG(14:1(9Z)/16:0/20:0)[iso6]
Heptyl 2-methylpropanoate		His Trp Trp			L-2,3-Dihydrodipicolinate		TG(16:0/16:1(9Z)/21:0)[iso6]
Hercynine		His Tyr Gln			L-2-Amino-4-(hydroxymethylphosphinyl)butanoate		TG(22:6(4Z,7Z,10Z,13Z,16Z,19Z)/16:1(9Z)/22:6(4Z,7Z,10Z,13Z,16Z,19Z))[iso3]
Heteratisine		Hispidulin 7-rhamnoside			L-655,240		Thalicarpine
Hexacosanedioic acid		Histidinyl-Glycine			Labriformin		Theasapogenol E
Hexadecanoic acid, 2,2-difluoro-		His-Trp-OH			Lanosol		Thermozeaxanthin-15/ Zeaxanthin glucoside ester
Hexahomomethionine		His-TyrMe-OH			Lathyrine		Thr Arg Ala
Hexahydro-6,7-dihydroxy-5-(hydroxymethyl)-3-(2-hydroxyphenyl)-2H-pyrano[2,3-d]oxazol-2-one		HNHA			L-Citronellol glucoside		Thr Arg Lys
Hexan-2-ol		Homaline			Lepidine		Thr Asn Lys
Hexyl glucoside		Homodolicholide			Leptomycin B		Threoninyl-Aspartate
His Arg Tyr		Homostachydrine			Leptophos		Threoninyl-Serine
His Asp Arg		Hovenine A			Lettucenin A		Tiletamine
His Gln Cys		HPF			Leu Asn Ile		Tolclofos-methyl
His His Met		Hydrocortisone Phosphate			Leu Gln Asn		Tomatine
His Leu Ala		Hydroxyatrazine			Leu His Cys		Torasemide
His Leu Asp		Hydroxydestruxin B			Leu Pro Glu		Torvoside D
His Met Thr		Hydroxyitraconazole			Leu-Asp-OH		Torvoside G
Hispaglabridin A		Hypaconitine			Leucanthogenin		Tos-Arg-CH2Cl
Hispidulin 7-rhamnoside		Hypoxanthine			Leucomycin A8		Tragopogonsaponin D
Histidinyl-Glycine		Ibutilide			Leucomycin A9		Tralomethrin
Histidinyl-Histidine		Icacine			Leucopterin		trans-9,10-Epoxynonadecane
His-Trp-OH		ICI D1694			Leucyl-leucine		trans-Dehydroandrosterone
HMT-toxin		Ile Phe			Leukotriene D4 methyl ester		trans-Resveratrol 4'-sulfate
HNHA		Ile Phe Tyr			Leukotriene D4-d5		Triciribine
Hodgkinsine		Imazosulfuron			Levobunolol sulfate		Tridecanamide
Homodolicholide		Imicyafos			Levulinic acid		Trigoneoside Xb
HoPhe-TyrMe-OH		Immunomycin			L-Glutamine		Trihexosylceramide (d18:1/9Z-18:1)
Hordatine A		Inosine triphosphate			Lignoceryl alcohol		Tris(2,3-dibromopropyl) phosphate
Hovenine A		Integerressine			Lilaline		Tropacocaine
Hydrocortisone Phosphate		Integerrine			Linoleamide		Trp Pro Met
Hydroxyanastrozole		Ioxynil octanoate			Linolein Hydroperoxides		Trp Trp Ala
Hydroxydestruxin B		Ipecac (Psychotrine)			Linustatin		Trp-P-1
Hydroxyitraconazole		Ipratropium			Liriodendrin		TR-Saponin A
Hydroxynervonic acid		Irinotecan			Litcubine		Tubastatin A
Hydroxyphthioceranic acid (C39)		isepamicin			Lithocholate 3-O-glucuronide		Tuberoside
Hydroxyphthioceranic acid (C40)		iso-1,2-nonadecanediol			L-O-Methylthreonine		Tubocurarine
Hypaconitine		iso-1,2-octadecanediol			Lonchocarpan		Tyr Arg Ala
Hypercalin B		Isobavachromene			Lonchocarpol C		Tyr Arg Arg
Ibutilide		Isoeugenitol			Lophirone I		Tyr Phe Thr
Icacine		Isomigrastatin			Lopinavir		Tyr Pro Arg
ICI 164384		Isomorellic acid			Louisfieserone A		Tyr Tyr Val
ICI D1694		Isomurrayazoline			L-Oxalylalbizziine		Tyramine
Ile Gln His		Isopentyl beta-D-glucoside			LTB4 ethanol amide		Tyrosol 4-sulfate
Ile Phe Trp		Isopentyl pyrophosphate			L-threo-3-Methylaspartate		UCL 1608
Ile Phe Tyr		Isoprothiolane sulfoxide			Lupinate		Udenafil
Imatinib		Isoreserpine			Lupinisoflavone J		Umbelliferyl Arachidonate
Imazosulfuron		Iso-Valeraldehyde			L-Urobilinogen		undecaprenol
Imicyafos		Isovitexin			LY171883		Undecylprodigiosin
Inabenfide		Isoyatein			Lyciumoside III		Uralenolide
Indeloxazine		Istamycin A3			Lys Ala Asn		URB447
Indoxylsulfuric acid		I-Urobilin			Lys Cys Gly		URB597
Inosine triphosphate		Janthitrem C			Lys Gln Cys		Urocortisol
Integerressine		JWH 018 N-(5-hydroxypentyl) β-D-Glucuronide			Lys Gln Val		Uroporphyrin I
Inuline		JWH 081 N-(5-hydroxypentyl)			Lys Glu Asn		Usambarine
Ioxynil octanoate		JWH 200 4-hydroxyindole metabolite			Lys His Cys		Uvaretin
Iprobenfos		JWH145			Lys Leu Glu		Val Arg Met
Iriskumaonin		Kaempferol 3-(2''-(E)-p-coumaroyl-alpha-L-arabinofuranoside)-7-rhamnoside			Lys Leu His		Val His Ala
iso-1,2-nonadecanediol		Kaempferol 3-p-coumarate			Lys Lys Ser		Val Tyr Ser
Isoanhydroicaritin		Kaempferol 7-alpha-L-arabinoside			Lys Trp		Valerosidatum
Isoeugenitol		Kanzonol Y			Lys Tyr Tyr		Valerylglycine
Isomigrastatin		Karanjachromene			Lys-His-OH		Valyl-Serine
Isomorellic acid		Karwinskione			LysoPC(22:4(7Z,10Z,13Z,16Z))		Vescalin
Isomurrayazoline		Khivorin			LysoPC(26:0)		Vicianose
Isopentenyl adenosine		Kinobeon A			LysoPC(26:1(5Z))		Vincanin B
Isopentyl pyrophosphate		Kokusaginine			LysoPE(0:0/22:5(4Z,7Z,10Z,13Z,16Z))		VPGPR Enterostatin
Isopropyl 9Z-octadecenoate		KT 5823			LysoPE(15:0/0:0)		Withaperuvin F
Isoprothiolane sulfoxide		Kurarinol			Lysyl-Histidine		WZ811
Isorenieratene/ (Leprotene)		Kurilensoside J			Macluroxanthone		Xanthine-8-carboxylate
Isoreserpine		Kushenol W			Madlongiside C		Xanthopterin-B2
Iso-Valeraldehyde		Kynuramine			Mafoprazine mesylate		xi-1-(Propylthio)-1-propanethiol
Isoyatein		L,L-Cyclo(leucylprolyl)			Malaoxon		YGM 5B
Istamycin A3		L-2-Amino-4-(hydroxymethylphosphinyl)butanoate			Malyngamide C		Zebularine
Istamycin C		L-902,688			Malyngamide J		Zolmitriptan
Istamycin FU-10		Lablaboside C			Malyngamide K		Z-Phe-Phe-CHN2
I-Urobilin		Labriformin			Malyngamide L		Zygadenine
Ivermectin B1a		LacCer(d18:1/14:0)			m-Aminophenol		α-Mangostin
Ixabepilone		Lanosol			Mangiferin 6'-gallate		α-Zeacarotene
Jamaicamide A		Laricitrin 3-rutinoside			Maritimetin 6-(6''-acetylglucoside)		β-Alanyl-L-lysine
Jasmolone glucoside		L-Arogenate			MDL 74156 glucuronide		β-Carotene
Jesaconitine		L-Ascorbic acid-2-glucoside			Mebendazole
JSTX-3		Latanoprost-d4			Mebendazole metabolite (Carbamic acid, [5-(hydroxyphenylmethyl)-1H-benzimidazol-2-yl]-, methyl ester
Jurubine		Lenalidomide			Mebeverine metabolite (1-Butanol, 4-[ethyl[2-(4-methoxyphenyl)-1-methylethyl]amino]- glucuronide)
JWH 018 N-(2-methylbutyl) isomer		Lepidine			Mebeverine metabolite (1-Butanol, 4-[ethyl[2-(4-methoxyphenyl)-1-methylethyl]amino]-)
JWH 018 N-(5-bromopentyl) analog		Leu Arg Ile			Mebhydrolin
JWH 018 N-(5-hydroxypentyl) β-D-Glucuronide		Leu Asn Ile			MEGA
JWH 081 N-(5-hydroxypentyl)		Leu Gln Ala			Melleolide K
JWH 200 4-hydroxyindole metabolite		Leu Glu Arg			Melleolide L
JWH175		Leu His Cys			Melongoside H
Kaempferol 3-(2''-(E)-p-coumaroyl-alpha-L-arabinofuranoside)-7-rhamnoside		Leu Phe Glu			Met Gln Lys
Kaempferol 3-p-coumarate		Leu Pro Glu			Met Met Gly
Kaempferol 7-alpha-L-arabinoside		Leu Thr His			Met Met Trp
Kanokoside B		Leu-Asp-OH			Met Pro Val
Karanjachromene		Leucanthogenin			Met Tyr Tyr
Karwinskione		Leucomycin A7			Met Val
Kinamycin D		Leucyl-leucine			Metanephrine
Kinetin Riboside		Leu-HoPhe-OH			Methallenestril
Kinobeon A		Leukotriene E4-d5			Methionyl-Asparagine
Kiwiionoside		Levan			Methionyl-Methionine
Koenigine		Levobunolol sulfate			Methoxamine
Kokusaginine		Levulinic acid			Methoxybrassenin A
KT 5720		L-Gizzerosine			Methoxychlor
KT 5823		L-Glutamic acid n-butyl ester			Methscopolamine
Kukoamine C		Licoricesaponin E2			Methyl (3x,10R)-dihydroxy-11-dodecene-6,8-diynoate 10-glucoside
Kurarinol		Licoricesaponin J2			Methyl (9Z)-8'-oxo-6,8'-diapo-6-carotenoate
Kushenol R		Lignoceryl alcohol			Methyl 1-(methylsulfinyl)propyl disulfide
Kushenol W		Limonexic acid			Methyl 1-(propylsulfinyl)propyl disulfide
L-902,688		Linamarin			Methyl 18-bromo-5,6-trans-endomethylene-7,11,15-trimethyl-8E,10Z-octadecadien-17-ynoate
Lablaboside C		Linezolid			Methyl 3,4,5-trimethoxycinnamate [arabinosyl-(1->3)-[glucosyl-(1->6)]-glucosyl] ester
Lactarazulene		Linusitamarin			Methyl 3b-hydroxy-13(18)-oleanen-28-oate
lanostane		Litcubinine			Methyl 7-epi-12-hydroxyjasmonate glucoside
Lansioside A		Lithocholic acid taurine conjugate			Methyl hydrogen fumarate
Lapatinib		L-Nicotianine			Methyl jasmonate
Laricitrin 3-rutinoside		Lonchocarpan			Methyl methanethiosulfonate
L-Arogenate		Lonchocarpenin			Methylbenzethonium
L-Ascorbic acid-2-glucoside		Lonchocarpol C			Methyldopa
Laserpitin		Longistylin C			Methylhildgardtol A
Latanoprost ethyl amide		Louisfieserone A			Methylsyringin
Laxichalcone		L-Oxalylalbizziine			Methymycin
L-beta-aspartyl-L-leucine		Loxapine			Metocurine Iodide
Lenalidomide		L-phenylalanyl-L-proline			Metofluthrin
Leonuridine		Lupinisoflavone J			Metoprolol
Letrozole		Luteolin 7-[6''-(2-methylbutyryl)glucoside]			Metoxuron
Leu Cys Val		Luteolin 7-[6''-(3-hydroxy-3-methylglutaryl)glucoside]			Met-Phe4Cl-OH
Leu Gln Ala		Luteolinidin			Metsulfovax
Leu Glu Arg		LY201116			MG(0:0/14:1(9Z)/0:0)
Leu Gly		Lyciumin B			MG(24:1(15Z)/0:0/0:0)
Leu Phe Glu		Lys Ala Asn			MGDG(18:2(9Z,12Z)/18:3(9Z,12Z,15Z))
Leu Thr His		Lys Asp Ile			Minabeolide-5
Leucomycin A7		Lys Gln Cys			Minabeolide-7
Leucyl-leucyl-norleucine		Lys Glu Asn			MIPC(d18:0/18:0)
Leu-HoPhe-OH		Lys Met Val			Miraxanthin-III
Levan		Lys Tyr Tyr			Misoprostol (free acid)-d5
L-Gizzerosine		LysoPC(24:1(15Z))			Mitobronitol
L-Glutamic acid dibutyl ester		LysoPC(26:0)			Mitomycin
L-Glutamic acid n-butyl ester		LysoPE(0:0/22:0)			Mivacurium Metabolite (Isoquinolinium, 1,2,3,4-tetrahydro-2-(3-hydroxypropyl)-6,7-dimethoxy-2-methyl
Licoricesaponin E2		LysoPE(0:0/22:5(4Z,7Z,10Z,13Z,16Z))			Moclobemide
Licoricesaponin J2		LysoPE(24:0/0:0)			Moexipril
Limonene aldehyde		Lys-Ser-OH			Molybdoenzyme molybdenum cofactor
Limonexic acid		Lysyl-Valine			Monoacetoxyscirpenol
Linamarin		Mabiogenin 3-[rhamnosyl-(1->6)-[glucosyl-(1->2)]-glucoside]			Monochloro-monoglutathionyl melphalan
Linezolid		Macluroxanthone			Mono-N-desisopropyldisopyramide
Linocinnamarin		Mactraxanthin			Montanin
Linoleoyl Ethanolamide		Malaoxon			Montecristin
Linusitamarin		Malyngamide C			Morellin
Lipid X		Malyngamide K			Moxifloxacin
Lipomycin		Malyngamide L			MRE-269
Liquoric acid		Manzamine A			Mucronine A
Litcubinine		Maraviroc			Munetone
Lithocholic acid sulfate		Margaric acid(d3)			Murrayacinine
L-Menthone 1,2-glycerol ketal		Marshdine			Musabalbisiane C
L-N-Carboxymethylserine		Matteucinol 7-O-glucoside			Mycalamide B
Lonchocarpol B		Mebendazole			Mycocerosic acid (C27)
Longistylin C		Mebendazole metabolite (Carbamic acid, [5-(hydroxyphenylmethyl)-1H-benzimidazol-2-yl]-, methyl ester			Mycothiol
Loroxanthin ester/ Loroxanthin dodecenoate		Mefexamide			Myricanene A 5-[arabinosyl-(1->6)-glucoside]
Loxapine		MEGA			Myrtucommulone A
Lupanyl Acid		Melamine			Mytilin A
L-Urobilin		Melilotin			Myxochromide S2
Luteolin 7-[6''-(2-methylbutyryl)glucoside]		Melongoside H			Myxol glycoside/ (Myxoxanthophyll)
Luteolin 7-[6''-(3-hydroxy-3-methylglutaryl)glucoside]		Menaquinone-9			N-(1-Deoxy-1-fructosyl)methionine
Luteolinidin		Mesquitol-4beta-ol			N-(2-phenoxy-ethyl) arachidonoyl amine
LY201116		Met Cys Asn			N-(2R-hydroxy-15-methyl-3E-octadecenoyl)-4E,10E,12E-sphingatrienine
Lyciumin B		Met Gln Cys			N-(3-(15-methyl-hexadecanoyloxy)-13-methyl-tetradecanoyl)-L-serine
Lyngbyatoxin		Met Lys Leu			N-(3-pyridyl)-Indomethacin amide
Lys Asp Arg		Met Met Asn			N-(3S-hydroxydecanoyl)-L-serine
Lys Met Val		Met Met Trp			N-(3α,12α-dihydroxy-5β-cholan-24-oyl)-glycine
Lys Phe Phe		Metanephrine			N-(4-Chloro-3-methyl-5-isothiazolyl)-N-methyl-2-[p-[(alpha,alpha,alpha-trifluoro-p-tolyl)oxy]phenyl]acetamide
Lys Ser Ser		Metaxalone			N-(furan-2-ylmethyl)-1H-pyrazolo[3,4-d]pyrimidin-4-amine
Lyso-PAF C-16-d4		Methallenestril			N-(hexadecanoyl)-deoxysphing-4-enine-1-sulfonate
LysoPC(20:2(11Z,14Z))		Methapyrilene			N-(tetradecanoyl)-deoxysphing-4-enine-1-sulfonate
LysoPE(0:0/14:1(9Z))		Metharbital			N,N'-bis(2-chloroethyl)- Urea (Carmustine Metabolite)
LysoPE(0:0/22:0)		Methionyl-Asparagine			N,N-Didesmethyltamoxifen
LysoPE(0:0/22:4(7Z,10Z,13Z,16Z))		Methocarbamol			N,N-dimethyl arachidonoyl amine
LysoPE(22:1(13Z)/0:0)		Methoxamine			N,N-Hexamethyleneamiloride
LysoPE(22:2(13Z,16Z)/0:0)		Methoxybrassenin A			N-[(3a,5b,7a,12a)-3,12-dihydroxy-24-oxo-7-(sulfooxy)cholan-24-yl]-Glycine
LysoPE(24:6(6Z,9Z,12Z,15Z,18Z,21Z)/0:0)		Methoxybrassitin			N-[[3-(b-D-Glucopyranosyloxy)-2,3-dihydro-2-oxo-1H-indol-3-yl]acetyl]aspartic acid
Lys-Ser-OH		Methoxychlor			N-[2-Hydroxy-2-(4-hydroxyphenyl)ethyl]cinnamide
Lysyl-Glutamine		Methoxyflurane			N1-(5-Phospho-a-D-ribosyl)-5,6-dimethylbenzimidazole
Lysyl-Valine		Methscopolamine			N1,N5,N10-Tricoumaroyl spermidine
Lythidathion		Methyl (3x,10R)-dihydroxy-11-dodecene-6,8-diynoate 10-glucoside			n1,n8-diacetylspermidine
MAB 4		Methyl 1-(methylsulfinyl)propyl disulfide			N2-Fructopyranosylarginine
Mabiogenin 3-[rhamnosyl-(1->6)-[glucosyl-(1->2)]-glucoside]		Methyl 3,4-dicaffeoylquinate			N3-Metyladenine
Macrozamin		Methyl 3b-hydroxy-13(18)-oleanen-28-oate			N6,N6-Dimethyladenosine
Mactraxanthin		Methyl 7-epi-12-hydroxyjasmonate glucoside			N-Acetyl-5-hydroxysulfapyridine
Maculine		Methyldopamine			N-Acetylbialaphos
makisterone B		Methyldopate			N-Acetylprimaquine
Manzamine A		Methylhildgardtol A			N-acetyl-S-geranylgeranyl-L-Cysteine
Maraviroc		Methyl-L-NIO			N-Ac-Tyr-Val-Ala-Asp-CMK
Margaric acid(d3)		Methylmethane Sulfonate			Nadolol
Marshdine		Methylsulfomycin I			Na-L-Glutamyl-L-aspartic acid
Matteucinol 7-O-glucoside		Methyprylon			N-alpha-Acetyl-L-2,4-diaminobutyrate
Mebeverine metabolite (Veratric acid glucuronide)		Metofluthrin			NAPE(16:0/18:1(9Z)/20:4(5Z,8Z,11Z,14Z)
Mefexamide		MG(0:0/14:1(9Z)/0:0)			Naphthyl dipeptide
Melatonin		MG(24:1(15Z)/0:0/0:0)			Narasin B
Melilotin		MGDG(18:2(9Z,12Z)/18:3(9Z,12Z,15Z))			Narceinone
Menaquinone-9		MGDG(18:3(9Z,12Z,15Z)/18:4(6Z,9Z,12Z,15Z))			N-Benzoylaspartic acid
Mequitazine		MGDG(20:5(5Z,8Z,11Z,14Z,17Z)/18:3(9Z,12Z,15Z))			N-Butylscopolamine
Mercaptoacetyl-Phe-Leu		M-Hydroxydesmethylgliquidone			N-Cyclopropyl-trans-2-cis-6-nonadienamide
Mesobilirubinogen		Miglitol			N-depyridomethyl-Indinavir
Mesquitol-4beta-ol		Milbemectin			N-Desethylquinagolide
Met Cys Asn		Minabeolide-5			N-Desmethyleletriptan
Met Gln Cys		Miraxanthin-V			N-Didesmethylmifepristone (RU 42848)
Met Met Asn		Mitoxantrone			N-docosanoyl taurine
Met Met Val		Molsidomine			Neferine
Met Phe Pro		Molybdoenzyme molybdenum cofactor			Nemonapride
Metaxalone		Momordin Ia			Neoraucarpanol
Metazocine		Monochloro-monoglutathionyl melphalan			Nepafenac
MET-enkephalin		Monodesethylamiodarone			Nepetaside
Methanophenazine		Mono-N-desisopropyldisopyramide			Nepetin
Methapyrilene		Monotropein			Neriifolin
Methitural		Montecristin			Neryl rhamnosyl-glucoside
Methocarbamol		Mosesin 4			N-Ethylammelide
Methoxybrassitin		Moxifloxacin			NeuAcalpha2-6Galbeta1-3GlcNAcbeta1-3Galbeta1-4Glcbeta-Cer(d18:1/16:0)
Methoxyflurane		MRE-269			NeuAcalpha2-6Galbeta1-3GlcNAcbeta1-3Galbeta1-4Glcbeta-Cer(d18:1/18:0)
Methyl 3,4-dicaffeoylquinate		MS-275			Neurosporaxanthin β-D-glucopyranoside
Methyl 3-oxo-12-oleanen-28-oate		Munetone			N-Formyl-4-amino-5-aminomethyl-2-methylpyrimidine
methyl 9-hydroperoxy-10,12-epidioxy-13,15-octadecadienoate		Mureidomycin A			N-Formylnorfloxacin
Methyl dioxindole-3-acetate		Muricin E			NG-amino-L-Arginine
Methyl reserpate		Musabalbisiane C			N-Hydroxy-L-tyrosine
Methylcarbamyl PAF C-16		Musk xylene			Niazirin
Methyldopamine		Mycinamicin III			Nicarbazin
Methyldopate		Mycothiol			Nicotinamide, N-(2-hydroxyethyl)-
Methyllinderatin		Mycotoxin T 2			Nicotine imine
Methyl-L-NIO		Myricanene A 5-[arabinosyl-(1->6)-glucoside]			Niddamycin
Methylmethane Sulfonate		Myristic acid(d3)			Nigellimine N-oxide
Methylsulfomycin I		Myristicanol A			Nigroxanthin
MG(0:0/20:4(5Z,8Z,11Z,14Z)/0:0)		Mytilin A			Nimesulide
MGDG(16:0/18:2(9Z,12Z))		Myxalamid D			Nimodipine
MGDG(18:3(9Z,12Z,15Z)/18:4(6Z,9Z,12Z,15Z))		Myxochromide S1			Nisoldipine
MGDG(20:5(5Z,8Z,11Z,14Z,17Z)/18:3(9Z,12Z,15Z))		Myxochromide S2			Nitazoxanide
M-Hydroxydesmethylgliquidone		Myxochromide S3			nitecapone
m-Hydroxydiphenyldimercury(1+)		N-(1-Deoxy-1-fructosyl)leucine			Nitine
Microcolin C		N-(1-Deoxy-1-fructosyl)methionine			Nitrazepam
Miglitol		N-(1-Deoxy-1-fructosyl)phenylalanine			Nitrendipine
Milbemectin		N-(1-Deoxy-1-fructosyl)tryptophan			N-Methyl-14-O-demethylepiporphyroxine
Minabeolide-2		N-(2,6-Dimethylphenyl)-4-[[(diethylamino)acetyl]amino]benzamide			N-Methyl-1-deoxynojirimycin
Miraxanthin-V		N-(2-hydroxyethyl)henicosanamide			N-Methyl-2,3,7,8-tetramethoxy-5,6-dihydrobenzophenathridine-6-ethanoic acid
Mitoxantrone		N-(3-Indolylacetyl)-L-isoleucine			N-methyl-Gabapentin
Mivacurium Metabolite (Isoquinolinium, 2-[3-[[(4E)-7-carboxy-1-oxo-4-heptenyl]oxy]propyl]-1,2,3,4-te		N-(3-Methylbutyl)acetamide			N-Methylolacrylamide
MK 0457		N-(3-oxo-octanoyl)-homoserine lactone			N'-Nitrosoanatabine
Molsidomine		N-(3-pyridyl)-Indomethacin amide			N-Nitrosodi-n-propylamine
Molybdenum cofactor (sulfide)		N-(diphenylmethylene) Glycine benzyl ester			N-octanoyl-L-Homoserine lactone
Momordin Ia		N-(hexadecanoyl)-deoxysphing-4-enine-1-sulfonate			N-oleoyl leucine
Monoanhydroescholtzxanthin		N-(naphthalen-1-yl)benzamide			Nonacosanoic acid
Monodesethylamiodarone		N-(tetradecanoyl)-sphing-4-enine-1-(2-aminoethylphosphonate)			Nonanoyl-CoA
Monoglyceride citrate		N,N,N-trimethyl-sphingosine			Norbinaltorphimine
Monotropein		N,N'-bis(2-chloroethyl)- Urea (Carmustine Metabolite)			Norcocaine nitroxide
Mosesin 4		N,N-Dimethylamiloride			Norfloxacin
MS-275		N,O-Didesmethylverapamil			Normetanephrine sulfate
Mucoxin		N-[[3-(b-D-Glucopyranosyloxy)-2,3-dihydro-2-oxo-1H-indol-3-yl]acetyl]aspartic acid			Noruron
Mureidomycin A		N-[2-Hydroxy-2-(4-hydroxyphenyl)ethyl]cinnamide			N-palmitoyl tryptophan
Muricatenol		n1,n8-diacetylspermidine			NS-5
Muricatin B		N2,N2-Dimethylguanosine			N-stearoyl arginine
Murrastifoline F		N3'-Acetyltobramycin			N-stearoyl tryptophan
Musk xylene		N5,N10-Methenyltetrahydrofolic acid			N-Succinyl-L-diaminopimelic acid
Mycinamicin III		N6-Carbamoyl-DL-Lysine			N-tert-Butyloxycarbonyl-deacetyl-leupeptin
Mycobactin S		NAC-Diketide			N-Tris[hydroxymethyl]methyl-2-aminoethanesulfonic acid [TES]
Mycotoxin T 2		N-AcetylCilastatin			Nuarimol
Myristic acid(d3)		N-Acetyl-DL-methionine			Nystatin A1
Myristicanol A		N-Acetylnorfloxacin			OA-6129 B1
Myxalamid C		N-Acetyl-β-D-mannosamine			O-butanoyl-carnitine
Myxalamid D		N-Ac-Tyr-Val-Ala-Asp-CMK			Ochotensine
Myxochromide S1		Nadolol			o-Cresol
Myxochromide S3		N-alpha-Acetyl-L-2,4-diaminobutyrate			Octadecanoic acid, 2-mercapto-; alpha-Mercaptostearic acid
N-(1-Deoxy-1-fructosyl)leucine		Nap-Asn-OH			Octanoic acid, 3-amino-, (1)-
N-(1-Deoxy-1-fructosyl)phenylalanine		NAPE(16:0/18:1(9Z)/20:4(5Z,8Z,11Z,14Z)			Octanol
N-(1-Deoxy-1-fructosyl)proline		Nap-Ser-OH			O-Feruloylgalactarate
N-(1-Deoxy-1-fructosyl)tryptophan		N-arachidonoyl histidine			OH-Spheroidenone
N-(2-phenylethyl)-Indomethacin amide		N-arachidonoyl taurine			o-Hydroxyfinasteride
N-(3-Indolylacetyl)-L-isoleucine		N-Arachidonoyl-L-Serine			Oleoyl Oxazolopyridine
N-(3-Methylbutyl)acetamide		Narceinone			Oleyl Anilide
N-(4-benzenesulfonamide) arachidonoyl amine		N-Benzoylaspartic acid			Olmesartan Medoxomil
N-(diphenylmethylene) Glycine benzyl ester		Nb-Methyltetrahydroharmol			O-Methylsomniferine
N-(naphthalen-1-yl)benzamide		N-Desethylquinagolide			Ornaline
N-(tetradecanoyl)-sphing-4-enine-1-(2-aminoethylphosphonate)		N-desmethylimatinib			Oscillatoxin A
N,2,3-Trimethyl-2-(1-methylethyl)butanamide		N-D-Glucosylarylamine			OSU03012
N,N,N-trimethyl-sphingosine		N-docosahexaenoyl glutamic acid			Oxaloglutarate
N,N-Dimethylamiloride		Nefazodone			Oxaziclomefone
N,O-Didesmethylverapamil		Nelfinavir			Oxethazaine
N-[(diphenylmethoxy)acetyl]-Glutamine		Neoraucarpanol			Oxitropium
N-1-Desalkylflurazepam		Neotame			Oxolucidine B
N2-Maltulosylarginine		Neotigogenin Acetate			oxy-Arachidonoyl Ethanolamide
N3'-Acetylgentamicin		Nepetaside			Oxycodone
N3'-Acetyltobramycin		Nepetin			Oxyphencyclimine
N5,N10-Methenyltetrahydrofolic acid		Neriifolin			PA(10:0/10:0)[U]
N5-Dinitrophenyl-L-ornithine methyl ester		N-Ethylammelide			PA(18:3(6Z,9Z,12Z)/17:0)
N6-Carbamoyl-DL-Lysine		Neu5Acα2-3[Galβ1-4GlcNAcβ]3-Sp			PA(18:3(9Z,12Z,15Z)/0:0)
NAC-Diketide		Neu5Acα2-8Neu5Acα2-3Galβ1-4Glcβ-Sp			PA(19:0/18:3(9Z,12Z,15Z))
N-Acetyl-2,6-diethylaniline		NeuAcalpha2-3Galbeta-Cer(d18:1/16:0)			PA(20:2(11Z,14Z)/18:3(6Z,9Z,12Z))
N-AcetylCilastatin		N-Formyl-4-amino-5-aminomethyl-2-methylpyrimidine			PA(20:5(5Z,8Z,11Z,14Z,17Z)/17:0)
N-Acetyl-D-glucosaminyl-N-acetylmuramoyl-L-Ala-D-glutamyl-6-carboxy-L-lysyl-D-alanine		NH-Phe(NMe)-Gly-OMe			PA(20:5(5Z,8Z,11Z,14Z,17Z)/17:2(9Z,12Z))
N-Acetyl-DL-methionine		Niazirin			PA(20:5(5Z,8Z,11Z,14Z,17Z)/18:3(9Z,12Z,15Z))
N-Acetylmuramoyl-Ala		Nicotine glucuronide			PA(22:0/0:0)
N-Acetylnorfloxacin		Nigakilactone C			PA(22:4(7Z,10Z,13Z,16Z)/12:0)
N-Acetyl-β-D-mannosamine		Nigellimine N-oxide			PA(22:4(7Z,10Z,13Z,16Z)/18:1(9Z))
N-Ac-Tyr-Val-Ala-Asp-CHO		Nilotinib			PA(22:4(7Z,10Z,13Z,16Z)/21:0)
Nafenopin		Nimodipine			PA(22:4(7Z,10Z,13Z,16Z)/22:1(11Z))
Nandrolone phenpropionate		Nisoldipine			PA(O-16:0/16:1(9Z))
Nap-Asn-OH		Nitazoxanide			PA(O-16:0/18:4(6Z,9Z,12Z,15Z))
Nap-Phe-OH		Nitrazepam			PA(O-20:0/22:6(4Z,7Z,10Z,13Z,16Z,19Z))
Nap-Ser-OH		Nitrendipine			PA(P-18:0/17:2(9Z,12Z))
N-arachidonoyl glutamine		Nitrothal-isopropyl			PA(P-18:0/22:6(4Z,7Z,10Z,13Z,16Z,19Z))
N-arachidonoyl taurine		N-Methyl-14-O-demethylepiporphyroxine			PA(P-20:0/16:0)
N-Arachidonoyl-L-Serine		N-Methylcalystegine B2			PA(P-20:0/22:1(11Z))
Nb-Methyltetrahydroharmol		n-Methylnicotinamide			Palmitoyl glucuronide
N-Butyl-beta-carboline-3-carboxylate		N-Methylolacrylamide			Palmitoyl Serotonin
N-Dealkylzuclopenthixol		N-Methylschinifoline			Palmitoyl thio-PC
n-decanohydroxamic acid		N-Monodesmethyldiltiazem			Palmyramide A
N-Desmethylclindamycin sulfoxide		N-Monomethyl-2-aminoethylphosphonate			Pangamic acid
N-desmethylimatinib		NNAL-N-glucuronide			Pantoic acid
N-Desmethylzolmitriptan		N'-Nitrosoanatabine			Pantothenic Acid
N-D-Glucosylarylamine		N-Nitrosothialdine			Pantoyllactone glucoside
N-docosahexaenoyl glutamic acid		Nonanoyl-CoA			para-Trifluoromethylphenol
Nefazodone		Norfloxacin			Parsonsine
Neotame		Norharman			Patuletin 3-(2''-apiosyl-[2'''-feruloylgentiobioside])
N-Ethylmaleimide-S-glutathione		Normetanephrine sulfate			PC(0:0/7:0)
Neu5Acα2-3[Galβ1-4GlcNAcβ]3-Sp		Norselic acid E			PC(0:0/8:0)[U]
Neu5Acα2-8Neu5Acα2-3Galβ1-4Glcβ-Sp		N-palmitoyl methionine			PC(10:0/18:2(9Z,12Z))
NeuAcalpha2-3Galbeta-Cer(d18:1/16:0)		NS-5			PC(11:1(10E)/16:0)[U]
N-gamma-Glutamyl-S-propylcysteine		N-stearoyl arginine			PC(12:0/22:1(11Z))
N-heptanoyl-homoserine lactone		N-stearoyl tryptophan			PC(13:0/22:1(11Z))
N-Hexadecyl-L-hydroxyproline		N-Succinyl-L-diaminopimelic acid			PC(15:1(9Z)/0:0)
NH-Phe(NMe)-Gly-OMe		Nuarimol			PC(16:0/13:0)
Nicotine glucuronide		Nummularine F			PC(16:0/23:5(8E,11E,14E,17E,20E))
Nigakilactone C		Nα-Acetyl-L-glutamine			PC(17:0/15:1(9Z))
Nilotinib		O-1,4-α-L-Dihydrostreptosyl-streptidine 6-phosphate			PC(17:0/16:1(9Z))
Nitralin		OA-6129 B1			PC(18:0/0:0)[S]
Nitrothal-isopropyl		Octadecanoic acid, 2-mercapto-; alpha-Mercaptostearic acid			PC(18:1(9E)/2:0)
Nizatidine		Octadecylphosphocholine			PC(18:3(6Z,9Z,12Z)/13:0)
N-Methylcalystegine B2		Octanol			PC(19:1(9Z)/0:0)
N-Methylindolo[3,2-b]-5alpha-cholest-2-ene		O-Demethylpuromycin			PC(20:0/18:4(6Z,9Z,12Z,15Z))
n-Methylnicotinamide		O-Desmethylverapamil			PC(20:3(8Z,11Z,14Z)/12:0)
N-methylphenylalanine		O-Feruloylgalactarate			PC(20:3(8Z,11Z,14Z)/17:2(9Z,12Z))
N-Methylputrescine		O-hexanoyl-adenosine monophosphate			PC(22:2(13Z,16Z)/20:3(5Z,8Z,11Z))
N-Methylschinifoline		Okadaic acid			PC(22:6(4Z,7Z,10Z,13Z,16Z,19Z)/0:0)
NNAL-N-glucuronide		Okanin 4-methyl ether 4'-O-(2''-O-caffeoyl-6''-O-acetylglucoside)			PC(22:6(4Z,7Z,10Z,13Z,16Z,19Z)/19:1(9Z))
N-Nitrosothialdine		Oleic Acid-biotin			PC(26:0/12:0)[U]
N-oleoyl histidine		Oleyl Anilide			PC(5:0/5:0)[U]
N-oleoyl tyrosine		O-Methylovaliflavanone C			PC(8:0/7:0)[U]
Norcapillene		O-Methylsomniferine			PC(9:0/5:0)
Norselic acid E		Oscillatoxin A			PC(9:0/9:0)[U]
Notoginsenoside T1		Oxaziclomefone			PC(O-1:0/2:0)[U]
N-palmitoyl GABA		Oxitropium			PC(O-14:0/16:0)
N-palmitoyl methionine		Oxolucidine B			PC(O-14:0/O-1:0)
N-palmitoyl threonine		Oxonic acid			PC(O-14:1(1E)/0:0)
N-Phosphohypotaurocyamine		Oxycodone			PC(O-16:0/17:0)
N-stearoyl taurine		Oxyphenonium			PC(O-16:0/O-1:0)[U]
N-stearoyl valine		p-[N-Propyl-N-(3-hydroxypropyl)sulfamoyl]benzoic acid			PC(O-16:2(9E,10E)/0:0)[U]
N-Succinyl-2-amino-6-ketopimelate		PA(12:0/12:0)[U]			PC(P-16:0/15:1(9Z))
N-tetradecanoyl-L-Homoserine lactone		PA(15:0/22:0)			PC(P-16:0/2:0)
N-tridecanoyl-L-Homserine lactone		PA(16:1(9Z)/0:0)			PC(P-16:0/22:1(11Z))
Nummularine F		PA(17:2(9Z,12Z)/0:0)			PC(P-18:0/0:0)
Nα-Acetyl-L-glutamine		PA(18:1(9Z)/17:0)			PC(P-18:1(9Z)/0:0)
O-1,4-α-L-Dihydrostreptosyl-streptidine 6-phosphate		PA(18:4(6Z,9Z,12Z,15Z)/0:0)			PE(14:1(9Z)/12:0)
O-Acetylcypholophine		PA(19:0/18:3(9Z,12Z,15Z))			PE(18:0/10:0)
Octhilinone		PA(19:3(10Z,13Z,16Z)/0:0)			PE(18:0/20:4(5Z,8Z,10E,14Z)(12OH[S]))
O-Deethylated candesartan		PA(20:2(11Z,14Z)/18:3(6Z,9Z,12Z))			PE(18:1(9Z)/13:0)
O-Desmethylverapamil		PA(20:5(5Z,8Z,11Z,14Z,17Z)/17:2(9Z,12Z))			PE(18:2(9Z,12Z)/13:0)
OH-Diaponeurosporene glucoside ester		PA(20:5(5Z,8Z,11Z,14Z,17Z)/18:1(9Z))			PE(18:3(9Z,12Z,15Z)/18:1(11Z))
O-hexanoyl-adenosine monophosphate		PA(21:0/0:0)			PE(18:4(6Z,9Z,12Z,15Z)/18:3(9Z,12Z,15Z))
Okadaic acid		PA(21:0/15:1(9Z))			PE(18:4(6Z,9Z,12Z,15Z)/18:4(6Z,9Z,12Z,15Z))
Okanin 4-methyl ether 4'-O-(2''-O-caffeoyl-6''-O-acetylglucoside)		PA(22:1(11Z)/15:0)			PE(19:0/0:0)
Oleandomycin		PA(22:2(13Z,16Z)/16:1(9Z))			PE(19:0/18:3(9Z,12Z,15Z))
Oleanolic Acid Acetate		PA(22:4(7Z,10Z,13Z,16Z)/22:1(11Z))			PE(19:1(9Z)/22:6(4Z,7Z,10Z,13Z,16Z,19Z))
Oleic Acid-biotin		PA(6:0/6:0)			PE(20:1(11Z)/24:1(15Z))
Oleoyl Ethanolamide		PA(O-18:0/20:3(8Z,11Z,14Z))			PE(20:3(8Z,11Z,14Z)/13:0)
Oleoyl-EA(d2)		PA(P-16:0/20:5(5Z,8Z,11Z,14Z,17Z))			PE(20:4(5Z,8Z,11Z,14Z)/18:3(6Z,9Z,12Z))
O-Methylovaliflavanone C		PA(P-18:0/18:2(9Z,12Z))			PE(20:4(5Z,8Z,11Z,14Z)/20:0)
Oryzanol A		PA(P-20:0/16:0)			PE(20:5(5Z,8Z,11Z,14Z,17Z)/15:0)
Ouabagenin		PA(P-20:0/19:1(9Z))			PE(21:0/19:0)[U]
Oxoglaucine		PA(P-20:0/22:1(11Z))			PE(22:1(11Z)/12:0)
Oxonic acid		PA(P-20:0/22:4(7Z,10Z,13Z,16Z))			PE(22:1(11Z)/18:2(9Z,12Z))
Oxyapramycin		Palmatoside G			PE(22:2(13Z,16Z)/14:1(9Z))
Oxyphenonium		Palmitic acid(d3)			PE(22:4(7Z,10Z,13Z,16Z)/13:0)
Oxypinnatanine		Palmitoyl 3-carbacyclic Phosphatidic Acid			PE(22:5(7Z,10Z,13Z,16Z,19Z)/20:3(8Z,11Z,14Z))
PA(12:0/12:0)[U]		Palmyramide A			PE(22:6(4Z,7Z,10Z,13Z,16Z,19Z)/19:0)
PA(12:0/15:1(9Z))		Pangamic acid			PE(22:6(4Z,7Z,10Z,13Z,16Z,19Z)/20:0)
PA(12:0/17:2(9Z,12Z))		Parishin B			PE(22:6(4Z,7Z,10Z,13Z,16Z,19Z)/22:2(13Z,16Z))
PA(12:0/18:2(9Z,12Z))		Parsonsine			PE(22:6(4Z,7Z,10Z,13Z,16Z,19Z)/24:1(15Z))
PA(12:0/18:4(6Z,9Z,12Z,15Z))		Patellamide A			PE(24:0/20:3(5Z,8Z,11Z))
PA(14:1(9Z)/14:1(9Z))		Paxilline			PE(O-20:0/0:0)
PA(15:0/22:0)		PC(0:0/7:0)			PE(O-20:0/19:0)
PA(15:1(9Z)/0:0)		PC(10:0/18:2(9Z,12Z))			PE(P-16:0/15:1(9Z))
PA(16:1(9Z)/0:0)		PC(10:2(2E,4E)/10:2(2E,4E))[S]			PE(P-16:0/17:0)
PA(16:1(9Z)/12:0)		PC(12:0/18:1(9Z))			PE(P-16:0/20:1(11Z))
PA(17:1(9Z)/0:0)		PC(12:0/20:5(5Z,8Z,11Z,14Z,17Z))			PE(P-18:0/17:2(9Z,12Z))
PA(17:1(9Z)/13:0)		PC(12:0/22:1(11Z))			PE(P-18:1(9Z)/14:0)
PA(17:1(9Z)/22:6(4Z,7Z,10Z,13Z,16Z,19Z))		PC(13:0/20:4(5Z,8Z,11Z,14Z))			PE(P-18:1(9Z)/18:4(6Z,9Z,12Z,15Z))
PA(18:1(9Z)/17:0)		PC(16:0/4:0)[U]			PE(P-20:0/0:0)
PA(18:2(9Z,12Z)/0:0)		PC(17:0/16:1(9Z))			PE(P-20:0/15:1(9Z))
PA(18:3(6Z,9Z,12Z)/22:6(4Z,7Z,10Z,13Z,16Z,19Z))		PC(17:1(9Z)/17:2(9Z,12Z))			PE(P-20:0/16:0)
PA(18:3(9Z,12Z,15Z)/17:2(9Z,12Z))		PC(17:2(9Z,12Z)/17:2(9Z,12Z))			PE(P-20:0/18:2(9Z,12Z))
PA(18:4(6Z,9Z,12Z,15Z)/0:0)		PC(17:2(9Z,12Z)/22:6(4Z,7Z,10Z,13Z,16Z,19Z))			PE-Cer(d14:1(4E)/20:1(11Z)(2OH))
PA(19:0/12:0)		PC(18:0/11:1(10E))			PE-Cer(d15:2(4E,6E)/18:0(2OH))
PA(19:1(9Z)/16:1(9Z))		PC(18:0/14:0)[U]			PE-Cer(d16:1(4E)/19:0)
PA(19:3(10Z,13Z,16Z)/0:0)		PC(18:3(9Z,12Z,15Z)/17:2(9Z,12Z))			PE-Cer(d16:2(4E,6E)/24:1(15Z))
PA(20:0/0:0)		PC(18:3(9Z,12Z,15Z)/20:2(11Z,14Z))			Pectenotoxin 1
PA(20:2(11Z,14Z)/22:6(4Z,7Z,10Z,13Z,16Z,19Z))		PC(18:4(6Z,9Z,12Z,15Z)/12:0)			Pelargonaldehyde
PA(20:4(5Z,8Z,11Z,14Z)/0:0)		PC(19:1(9Z)/0:0)			Pelargonidin 3-(6-(malonyl)glucoside)-7-(6-(4-(glucosyl)-p-hydroxybenzoyl)glucoside)
PA(20:4(5Z,8Z,11Z,14Z)/13:0)		PC(20:3(8Z,11Z,14Z)/13:0)			Pelargonidin 3-(6''-malonylglucoside)
PA(20:4(5Z,8Z,11Z,14Z)/22:6(4Z,7Z,10Z,13Z,16Z,19Z))		PC(20:3(8Z,11Z,14Z)/17:2(9Z,12Z))			Pemirolast
PA(20:5(5Z,8Z,11Z,14Z,17Z)/0:0)		PC(20:4(8Z,11Z,14Z,17Z)/20:4(8Z,11Z,14Z,17Z))			Penicilloic G acid
PA(20:5(5Z,8Z,11Z,14Z,17Z)/18:1(9Z))		PC(20:5(5Z,8Z,11Z,14Z,17Z)/14:0)			PE-NMe(20:0/20:0)[U]
PA(21:0/0:0)		PC(20:5(5Z,8Z,11Z,14Z,17Z)/18:3(9Z,12Z,15Z))			Penoxsulam
PA(21:0/15:1(9Z))		PC(20:5(5Z,8Z,11Z,14Z,17Z)/18:4(6Z,9Z,12Z,15Z))			Pentadecan-1-ol
PA(22:1(11Z)/15:0)		PC(21:4(6Z,9Z,12Z,15Z)/0:0)			Pentadecylic acid(d3)
PA(22:1(11Z)/16:0)		PC(22:2(13Z,16Z)/17:0)			Pentahydroxyflavanone
PA(22:2(13Z,16Z)/0:0)		PC(22:5(7Z,10Z,13Z,16Z,19Z)/22:5(7Z,10Z,13Z,16Z,19Z))			Pentasine
PA(22:2(13Z,16Z)/16:1(9Z))		PC(8:0/7:0)[U]			Pergolide sulfone
PA(22:4(7Z,10Z,13Z,16Z)/17:1(9Z))		PC(9:0/13:0)[U]			Periandrin V
PA(22:6(4Z,7Z,10Z,13Z,16Z,19Z)/14:1(9Z))		PC(O-18:0/0:0)			Perindoprilat glucuronide
PA(22:6(4Z,7Z,10Z,13Z,16Z,19Z)/16:1(9Z))		PC(O-18:0/2:0)[S]			Perindoprilat lactam A
PA(22:6(4Z,7Z,10Z,13Z,16Z,19Z)/22:6(4Z,7Z,10Z,13Z,16Z,19Z))		PC(O-19:0/2:0)[U]			PF-622
PA(6:0/6:0)		PC(P-15:0/0:0)			PG(12:0/14:1(9Z))
PA(O-16:0/21:0)		PC(P-18:0/0:0)			PG(12:0/15:1(9Z))
PA(O-18:0/13:0)		PC(P-18:0/20:4(8Z,11Z,14Z,17Z))			PG(12:0/18:3(6Z,9Z,12Z))
PA(O-18:0/20:3(8Z,11Z,14Z))		PC(P-18:1(9Z)/18:4(6Z,9Z,12Z,15Z))			PG(12:0/19:1(9Z))
PA(P-16:0/20:5(5Z,8Z,11Z,14Z,17Z))		PD 123177			PG(13:0/18:4(6Z,9Z,12Z,15Z))
PA(P-16:0/22:6(4Z,7Z,10Z,13Z,16Z,19Z))		PE(10:0/14:0)[U]			PG(15:0/0:0)
PA(P-18:0/18:2(9Z,12Z))		PE(12:0/15:1(9Z))			PG(17:1(9Z)/22:6(4Z,7Z,10Z,13Z,16Z,19Z))
PA(P-20:0/17:0)		PE(12:0/17:2(9Z,12Z))			PG(18:3(6Z,9Z,12Z)/22:6(4Z,7Z,10Z,13Z,16Z,19Z))
PA(P-20:0/18:3(9Z,12Z,15Z))		PE(14:1(9Z)/12:0)			PG(18:4(6Z,9Z,12Z,15Z)/20:1(11Z))
PA(P-20:0/19:1(9Z))		PE(14:1(9Z)/P-16:0)			PG(20:0/22:1(11Z))
PA(P-20:0/20:5(5Z,8Z,11Z,14Z,17Z))		PE(16:1(9Z)/12:0)			PG(20:2(11Z,14Z)/0:0)
PA(P-20:0/22:4(7Z,10Z,13Z,16Z))		PE(17:0/15:0)			PG(20:2(11Z,14Z)/22:6(4Z,7Z,10Z,13Z,16Z,19Z))
Pachymic acid		PE(17:2(9Z,12Z)/22:6(4Z,7Z,10Z,13Z,16Z,19Z))			PG(20:4(5Z,8Z,11Z,14Z)/16:1(9Z))
Palmatoside G		PE(18:0/17:0)[U]			PG(20:4(5Z,8Z,11Z,14Z)/18:3(9Z,12Z,15Z))
Palmitic acid(d3)		PE(18:1(9Z)/18:0)			PG(20:5(5Z,8Z,11Z,14Z,17Z)/18:3(9Z,12Z,15Z))
Palmitoyl 3-carbacyclic Phosphatidic Acid		PE(18:3(6Z,9Z,12Z)/20:5(5Z,8Z,11Z,14Z,17Z))			PG(22:0/12:0)
Panaxatriol		PE(18:3(9Z,12Z,15Z)/18:1(11Z))			PG(22:2(13Z,16Z)/20:1(11Z))
Panaxydol linoleate		PE(18:4(6Z,9Z,12Z,15Z)/15:1(9Z))			PG(22:6(4Z,7Z,10Z,13Z,16Z,19Z)/20:5(5Z,8Z,11Z,14Z,17Z))
Parishin B		PE(18:4(6Z,9Z,12Z,15Z)/18:4(6Z,9Z,12Z,15Z))			PG(O-16:0/0:0)
Patellamide A		PE(19:0/0:0)			PG(O-18:0/22:6(4Z,7Z,10Z,13Z,16Z,19Z))
Paxilline		PE(19:0/22:4(7Z,10Z,13Z,16Z))			PG(P-18:0/15:1(9Z))
PC(0:0/6:0)		PE(20:4(5Z,8Z,11Z,14Z)/14:1(9Z))			PG(P-18:0/17:2(9Z,12Z))
PC(10:2(2E,4E)/10:2(2E,4E))[S]		PE(20:4(5Z,8Z,11Z,14Z)/20:0)			PG(P-18:0/18:0)
PC(12:0/18:1(9Z))		PE(20:4(8Z,11Z,14Z,17Z)/20:3(8Z,11Z,14Z))			PG(P-18:0/20:5(5Z,8Z,11Z,14Z,17Z))
PC(12:0/20:5(5Z,8Z,11Z,14Z,17Z))		PE(20:5(5Z,8Z,11Z,14Z,17Z)/22:6(4Z,7Z,10Z,13Z,16Z,19Z))			PG(P-20:0/18:3(9Z,12Z,15Z))
PC(13:0/18:2(9Z,12Z))		PE(22:1(13Z)/20:1(11Z))			PG(P-20:0/18:4(6Z,9Z,12Z,15Z))
PC(13:0/20:4(5Z,8Z,11Z,14Z))		PE(22:4(7Z,10Z,13Z,16Z)/13:0)			PGPC
PC(14:0/11:0)[U]		PE(22:6(4Z,7Z,10Z,13Z,16Z,19Z)/20:0)			Phalluside-1
PC(14:1(9Z)/22:6(4Z,7Z,10Z,13Z,16Z,19Z))		PE(22:6(4Z,7Z,10Z,13Z,16Z,19Z)/22:2(13Z,16Z))			Phaseolotoxin
PC(16:0/4:0)[U]		PE(26:0/20:0)[U]			Phe Arg Asn
PC(17:0/22:6(4Z,7Z,10Z,13Z,16Z,19Z))		PE(O-20:0/19:1(9Z))			Phe Asn Asp
PC(17:1(10E)/17:1(10E))[U]		PE(P-16:0/13:0)			Phe Asp Ile
PC(17:1(9Z)/17:2(9Z,12Z))		PE(P-16:0/18:4(6Z,9Z,12Z,15Z))			Phe Gln Arg
PC(17:2(9Z,12Z)/17:2(9Z,12Z))		PE(P-18:0/0:0)			Phe Glu Glu
PC(17:2(9Z,12Z)/22:6(4Z,7Z,10Z,13Z,16Z,19Z))		PE(P-18:0/17:2(9Z,12Z))			Phe Gly Asp
PC(18:0/11:1(10E))		PE(P-18:1(11Z)/16:0)			Phe Gly Gly
PC(18:0/14:0)[U]		PE(P-20:0/15:0)			Phe Lys Leu
PC(18:0/18:3(9Z,12Z,15Z))[U]		PE(P-20:0/16:0)			Phe Met Phe
PC(18:1(7E)/18:1(7E))[U]		PE-Cer(d14:1(4E)/16:0)			Phe Phe Gly
PC(18:2(9Z,12Z)/12:0)		PE-Cer(d14:1(4E)/18:1(9Z))			Phe Phe Tyr
PC(18:3(9Z,12Z,15Z)/17:2(9Z,12Z))		PE-Cer(d14:1(4E)/20:0(2OH))			Phe Pro Asp
PC(18:3(9Z,12Z,15Z)/18:3(9Z,12Z,15Z))		PE-Cer(d14:1(4E)/20:1(11Z)(2OH))			Phe Ser His
PC(18:3(9Z,12Z,15Z)/20:2(11Z,14Z))		PE-Cer(d14:2(4E,6E)/16:0)			Phe Val Thr
PC(18:4(6Z,9Z,12Z,15Z)/12:0)		PE-Cer(d14:2(4E,6E)/26:0)			Phe4Cl-Phe4Cl-OH
PC(18:4(6Z,9Z,12Z,15Z)/15:1(9Z))		PE-Cer(d15:1(4E)/18:0)			Phenazocine
PC(18:4(6Z,9Z,12Z,15Z)/20:2(11Z,14Z))		PE-Cer(d15:1(4E)/20:0(2OH))			Phenicarbazide
PC(19:0/0:0)		PE-Cer(d15:2(4E,6E)/18:0(2OH))			Phenobenzuron
PC(20:2(11Z,14Z)/13:0)		PE-Cer(d16:1(4E)/16:0)			Phenylacetothiohydroximate
PC(20:3(8Z,11Z,14Z)/13:0)		PE-Cer(d16:2(4E,6E)/24:1(15Z))			Phenylephrine 3-O-glucuronide
PC(20:3(8Z,11Z,14Z)/20:3(5Z,8Z,11Z))		PE-NMe(16:0/18:1(9Z))			Phenylpyruvic acid
PC(20:4(8Z,11Z,14Z,17Z)/20:4(8Z,11Z,14Z,17Z))		PE-NMe2(17:0/17:0)[U]			Phoenicoxanthin/ Adonirubin/ 3-Hydroxycanthaxanthin
PC(20:5(5Z,8Z,11Z,14Z,17Z)/14:0)		PE-NMe2(O-14:0/O-14:0)			PHOME
PC(20:5(5Z,8Z,11Z,14Z,17Z)/18:3(9Z,12Z,15Z))		Pentadecan-1-ol			PHOP
PC(20:5(5Z,8Z,11Z,14Z,17Z)/18:4(6Z,9Z,12Z,15Z))		Pentadecylic acid(d3)			Phorbol Myristate Acetate
PC(21:4(6Z,9Z,12Z,15Z)/0:0)		Pentahydroxyflavanone			Phosfolan
PC(22:2(13Z,16Z)/17:0)		Pentasine			Phoslactomycin B
PC(22:5(7Z,10Z,13Z,16Z,19Z)/22:5(7Z,10Z,13Z,16Z,19Z))		Peonidin 3-galactoside			Phosphonoacetaldehyde
PC(22:6(4Z,7Z,10Z,13Z,16Z,19Z)/12:0)		Pepstatin			p-Hydroxyphenylbutazone glucuronide
PC(22:6(4Z,7Z,10Z,13Z,16Z,19Z)/13:0)		Periandrin V			Phylloquinone
PC(22:6(4Z,7Z,10Z,13Z,16Z,19Z)/17:1(9Z))		Perindoprilat lactam A			Physalin I
PC(6:0/6:0)[U]		Peroxyoctanoic acid			PI(12:0/0:0)
PC(9:0/14:0)[U]		Perseitol			PI(12:0/15:0)
PC(O-18:0/2:0)[S]		P-Fluorophenylalanine			PI(12:0/17:1(9Z))
PC(O-18:0/O-1:0)[U]		PG(12:0/15:1(9Z))			PI(17:0/14:0)
PC(O-19:0/2:0)[U]		PG(12:0/16:1(9Z))			PI(18:2(9Z,12Z)/13:0)
PC(O-3:1(1E)/O-18:1(9Z))[S]		PG(12:0/18:3(6Z,9Z,12Z))			PI(18:2(9Z,12Z)/16:1(9Z))
PC(O-7:0/O-7:0)		PG(13:0/18:4(6Z,9Z,12Z,15Z))			PI(19:0/22:4(7Z,10Z,13Z,16Z))
PC(O-8:0/2:0)		PG(14:1(9Z)/14:1(9Z))			PI(19:1(9Z)/12:0)
PC(P-18:0/20:4(8Z,11Z,14Z,17Z))		PG(16:1(9Z)/0:0)			PI(20:0/0:0)
PC(P-18:1(11Z)/20:5(5Z,8Z,11Z,14Z,17Z))		PG(17:1(9Z)/22:4(7Z,10Z,13Z,16Z))			PI(20:0/12:0)
PC(P-18:1(9Z)/18:4(6Z,9Z,12Z,15Z))		PG(18:0/22:2(13Z,16Z))			PI(20:3(8Z,11Z,14Z)/13:0)
PC(P-19:1(12Z)/0:0)		PG(18:4(6Z,9Z,12Z,15Z)/0:0)			PI(22:1(11Z)/0:0)
PD 123177		PG(18:4(6Z,9Z,12Z,15Z)/18:4(6Z,9Z,12Z,15Z))			PI(22:1(11Z)/19:1(9Z))
PE(10:0/14:0)[U]		PG(18:4(6Z,9Z,12Z,15Z)/20:1(11Z))			PI(22:1(11Z)/22:4(7Z,10Z,13Z,16Z))
PE(12:0/15:1(9Z))		PG(20:0/0:0)			PI(22:4(7Z,10Z,13Z,16Z)/20:0)
PE(12:0/17:2(9Z,12Z))		PG(20:2(11Z,14Z)/0:0)			PI(22:4(7Z,10Z,13Z,16Z)/22:0)
PE(12:0/18:3(6Z,9Z,12Z))		PG(20:5(5Z,8Z,11Z,14Z,17Z)/18:4(6Z,9Z,12Z,15Z))			PI(O-16:0/13:0)
PE(14:0/0:0)		PG(22:0/22:1(11Z))			PI(O-18:0/14:1(9Z))
PE(14:1(9Z)/14:1(9Z))		PG(22:0/22:4(7Z,10Z,13Z,16Z))			PI(O-20:0/18:3(9Z,12Z,15Z))
PE(14:1(9Z)/P-16:0)		PG(22:1(11Z)/14:0)			PI(O-20:0/22:6(4Z,7Z,10Z,13Z,16Z,19Z))
PE(14:1(9Z)/P-18:1(11Z))		PG(22:2(13Z,16Z)/15:1(9Z))			PI(P-16:0/18:4(6Z,9Z,12Z,15Z))
PE(16:1(9Z)/12:0)		PG(22:4(7Z,10Z,13Z,16Z)/17:2(9Z,12Z))			PI(P-18:0/0:0)
PE(17:0/15:0)		PG(22:6(4Z,7Z,10Z,13Z,16Z,19Z)/18:1(9Z))			PI(P-18:0/17:2(9Z,12Z))
PE(17:2(9Z,12Z)/0:0)		PG(22:6(4Z,7Z,10Z,13Z,16Z,19Z)/18:4(6Z,9Z,12Z,15Z))			PI(P-20:0/14:0)
PE(17:2(9Z,12Z)/22:6(4Z,7Z,10Z,13Z,16Z,19Z))		PG(6:0/6:0)			PI(P-20:0/17:2(9Z,12Z))
PE(18:0/17:0)[U]		PG(O-16:0/12:0)			PI(P-20:0/20:1(11Z))
PE(18:1(9Z)/16:1(9Z))		PG(O-16:0/18:2(9Z,12Z))			PI(P-20:0/20:4(5Z,8Z,11Z,14Z))
PE(18:1(9Z)/18:0)		PG(O-20:0/0:0)			PI-Cer(d20:0/18:0)
PE(18:3(6Z,9Z,12Z)/0:0)		PG(O-20:0/17:2(9Z,12Z))			Picrasin A
PE(18:4(6Z,9Z,12Z,15Z)/15:1(9Z))		PG(P-16:0/0:0)			Picrasin E
PE(18:4(6Z,9Z,12Z,15Z)/22:6(4Z,7Z,10Z,13Z,16Z,19Z))		PG(P-18:0/18:3(6Z,9Z,12Z))			Picrocrocin
PE(19:0/22:4(7Z,10Z,13Z,16Z))		PG(P-18:0/22:6(4Z,7Z,10Z,13Z,16Z,19Z))			Pimecrolimus
PE(20:3(5Z,8Z,11Z)/15:0)		PG(P-20:0/16:1(9Z))			Pipercitine
PE(20:3(5Z,8Z,11Z)/18:3(9Z,12Z,15Z))		PG(P-20:0/17:2(9Z,12Z))			Piperettine
PE(20:3(8Z,11Z,14Z)/19:0)		PG(P-20:0/18:4(6Z,9Z,12Z,15Z))			Pirenperone
PE(20:4(5Z,8Z,11Z,14Z)/20:1(11Z))		PGH2-EA			Pirimiphos-ethyl
PE(20:4(8Z,11Z,14Z,17Z)/20:3(8Z,11Z,14Z))		PGPC			piritramide
PE(20:5(5Z,8Z,11Z,14Z,17Z)/19:0)		Phaclofen			Piscidic Acid
PE(20:5(5Z,8Z,11Z,14Z,17Z)/22:6(4Z,7Z,10Z,13Z,16Z,19Z))		Phaseolotoxin			Pisumionoside
PE(22:0/17:0)		Phe Arg Asn			Poly-g-D-glutamate
PE(22:0/20:4(8Z,11Z,14Z,17Z))		Phe Asp Arg			Polysorbate 60
PE(22:1(13Z)/20:1(11Z))		Phe Asp Ile			Pondaplin
PE(22:2(13Z,16Z)/16:1(9Z))		Phe Gln Arg			Postin
PE(22:2(13Z,16Z)/19:1(9Z))		Phe Gln Phe			PPA(18:1(9Z)/18:1(9Z))
PE(22:2(13Z,16Z)/24:1(15Z))		Phe Glu Asn			pregnan-21-al
PE(22:4(7Z,10Z,13Z,16Z)/17:2(9Z,12Z))		Phe Glu Glu			Prenyl caffeate
PE(26:0/20:0)[U]		Phe Gly Asp			Pro Ala
PE(9:0/9:0)[U]		Phe His Ala			Pro Ala Glu
PE(O-16:0/15:0)		Phe Lys Leu			Pro Ala Pro
PE(O-16:0/O-16:0)		Phe Met Gln			Pro Asp
PE(O-18:0/12:0)		Phe Met Glu			Pro Cys Met
PE(O-18:0/20:5(5Z,8Z,11Z,14Z,17Z))		Phe Met Phe			Pro Gln Ala
PE(O-20:0/19:1(9Z))		Phe Phe			Pro Gly His
PE(P-16:0/0:0)		Phe Phe Val			Pro His Ala
PE(P-16:0/13:0)		Phe Ser His			Pro His Asn
PE(P-16:0/18:4(6Z,9Z,12Z,15Z))		Phe Trp Trp			Pro Lys Asp
PE(P-18:0/0:0)		Phe Val Thr			Pro Lys Cys
PE(P-18:0/16:0)		Phe4Cl-Phe4Cl-OH			Pro Lys Gly
PE(P-18:1(11Z)/15:0)		Phenazepam			Pro Met Gly
PE(P-18:1(11Z)/16:0)		Phenicarbazide			Pro Phe Phe
PE(P-18:1(9Z)/18:1(9Z))		Phenobenzuron			Pro Pro Phe
PE(P-20:0/15:0)		Phenylmethanesulfonyl fluoride			Pro Ser Ala
PE-Cer(d14:1(4E)/16:0)		Phenylpyruvic acid			Pro Ser Ser
PE-Cer(d14:1(4E)/20:0(2OH))		Phorbol Myristate Acetate			Pro Thr Lys
PE-Cer(d14:1(4E)/22:1(13Z)(2OH))		Phosfolan			Pro Trp Tyr
PE-Cer(d14:2(4E,6E)/16:0)		Phosphonoacetaldehyde			Pro Tyr Ala
PE-Cer(d14:2(4E,6E)/26:0)		Phthalazinone pyrazole			Prodiamine
PE-Cer(d15:1(4E)/18:0)		Phthalide			Prolyl-Arginine
PE-Cer(d15:1(4E)/20:0(2OH))		p-Hydroxytriamterene glucuronide			Propagermanium
PE-Cer(d15:1(4E)/22:0(2OH))		Phygrine			Propane-1,2-diol 1-phosphate
PE-Cer(d15:2(4E,6E)/20:0(2OH))		Physagulin A			Propyl 1-(propylsulfinyl)propyl disulfide
PE-Cer(d16:1(4E)/16:0)		Physagulin C			Prorepensin
Pederin		Physalin I			Proscillaridin A
Pefloxacine		Physalin M			Prostaglandin A1 ethyl ester
Penbutolol glucuronide		PI(14:1(9Z)/15:1(9Z))			Prostaglandin E2 p-acetamidophenyl ester
PE-NMe(16:0/18:1(9Z))		PI(15:0/0:0)			Protionamide sulfoxide
PE-NMe(18:2(9Z,12Z)/18:2(9Z,12Z))[U]		PI(15:1(9Z)/22:6(4Z,7Z,10Z,13Z,16Z,19Z))			PS(12:0/16:1(9Z))
PE-NMe(O-14:0/O-14:0)		PI(17:1(9Z)/22:6(4Z,7Z,10Z,13Z,16Z,19Z))			PS(12:0/17:2(9Z,12Z))
PE-NMe(O-16:0/O-16:0)		PI(18:0/16:2(9Z,12Z))			PS(12:0/18:3(6Z,9Z,12Z))
PE-NMe2(17:0/17:0)[U]		PI(18:3(9Z,12Z,15Z)/18:2(9Z,12Z))			PS(14:1(9Z)/22:6(4Z,7Z,10Z,13Z,16Z,19Z))
PE-NMe2(O-14:0/O-14:0)		PI(19:0/22:4(7Z,10Z,13Z,16Z))			PS(15:0/22:6(4Z,7Z,10Z,13Z,16Z,19Z))
Peonidin 3-galactoside		PI(20:0/0:0)			PS(15:1(9Z)/0:0)
Peposterol		PI(20:0/18:1(9Z))			PS(15:1(9Z)/22:6(4Z,7Z,10Z,13Z,16Z,19Z))
Pepstatin		PI(20:1(11Z)/17:0)			PS(17:1(9Z)/14:0)
Periconicin A		PI(20:1(11Z)/18:3(6Z,9Z,12Z))			PS(18:3(9Z,12Z,15Z)/0:0)
Peroxyoctanoic acid		PI(20:2(11Z,14Z)/13:0)			PS(18:3(9Z,12Z,15Z)/18:0)
Perseitol		PI(20:2(11Z,14Z)/15:1(9Z))			PS(18:4(6Z,9Z,12Z,15Z)/17:1(9Z))
Petasitenine		PI(20:2(11Z,14Z)/22:6(4Z,7Z,10Z,13Z,16Z,19Z))			PS(20:0/18:3(9Z,12Z,15Z))
P-Fluorophenylalanine		PI(20:3(8Z,11Z,14Z)/13:0)			PS(20:2(11Z,14Z)/0:0)
PG(12:0/12:0)[U]		PI(20:5(5Z,8Z,11Z,14Z,17Z)/18:3(6Z,9Z,12Z))			PS(20:4(5Z,8Z,11Z,14Z)/0:0)
PG(12:0/16:1(9Z))		PI(21:0/0:0)			PS(20:4(5Z,8Z,11Z,14Z)/13:0)
PG(12:0/18:0)		PI(22:1(11Z)/19:0)			PS(20:4(5Z,8Z,11Z,14Z)/21:0)
PG(14:1(9Z)/0:0)		PI(22:1(11Z)/19:1(9Z))			PS(21:0/13:0)
PG(14:1(9Z)/14:1(9Z))		PI(22:2(13Z,16Z)/18:0)			PS(21:0/18:3(6Z,9Z,12Z))
PG(15:1(9Z)/22:6(4Z,7Z,10Z,13Z,16Z,19Z))		PI(22:4(7Z,10Z,13Z,16Z)/20:0)			PS(21:0/22:6(4Z,7Z,10Z,13Z,16Z,19Z))
PG(17:1(9Z)/12:0)		PI(22:4(7Z,10Z,13Z,16Z)/22:6(4Z,7Z,10Z,13Z,16Z,19Z))			PS(22:1(11Z)/17:1(9Z))
PG(17:1(9Z)/22:4(7Z,10Z,13Z,16Z))		PI(22:6(4Z,7Z,10Z,13Z,16Z,19Z)/0:0)			PS(22:2(13Z,16Z)/15:1(9Z))
PG(17:2(9Z,12Z)/14:0)		PI(22:6(4Z,7Z,10Z,13Z,16Z,19Z)/15:0)			PS(22:4(7Z,10Z,13Z,16Z)/14:0)
PG(17:2(9Z,12Z)/15:0)		PI(O-16:0/0:0)			PS(22:4(7Z,10Z,13Z,16Z)/18:0)
PG(18:0/22:2(13Z,16Z))		PI(O-16:0/12:0)			PS(22:6(4Z,7Z,10Z,13Z,16Z,19Z)/17:1(9Z))
PG(18:2(9Z,12Z)/18:1(11Z))		PI(O-16:0/17:1(9Z))			PS(22:6(4Z,7Z,10Z,13Z,16Z,19Z)/18:1(9Z))
PG(18:3(9Z,12Z,15Z)/16:1(9Z))		PI(O-18:0/0:0)			PS(22:6(4Z,7Z,10Z,13Z,16Z,19Z)/22:0)
PG(18:4(6Z,9Z,12Z,15Z)/0:0)		PI(O-18:0/12:0)			PS(O-16:0/0:0)
PG(18:4(6Z,9Z,12Z,15Z)/18:4(6Z,9Z,12Z,15Z))		PI(O-18:0/22:1(11Z))			PS(O-16:0/17:1(9Z))
PG(19:0/22:6(4Z,7Z,10Z,13Z,16Z,19Z))		PI(P-18:0/0:0)			PS(O-16:0/19:1(9Z))
PG(19:1(9Z)/13:0)		PI(P-20:0/20:4(5Z,8Z,11Z,14Z))			PS(O-16:0/22:4(7Z,10Z,13Z,16Z))
PG(20:0/0:0)		PI(P-20:0/22:1(11Z))			PS(O-18:0/17:2(9Z,12Z))
PG(20:1(11Z)/13:0)		PI-Cer(d20:0/26:0(2OH))			PS(O-18:0/22:4(7Z,10Z,13Z,16Z))
PG(20:4(5Z,8Z,11Z,14Z)/13:0)		PI-Cer(t20:0/20:0)			PS(O-20:0/17:0)
PG(20:5(5Z,8Z,11Z,14Z,17Z)/18:4(6Z,9Z,12Z,15Z))		PI-Cer(t20:0/26:0(2OH))			PS(O-20:0/22:4(7Z,10Z,13Z,16Z))
PG(22:0/22:1(11Z))		Picrasin A			PS(P-16:0/14:1(9Z))
PG(22:0/22:4(7Z,10Z,13Z,16Z))		Picrasin G			PS(P-18:0/14:1(9Z))
PG(22:0/22:6(4Z,7Z,10Z,13Z,16Z,19Z))		PIP(18:2(9Z,12Z)/18:1(9Z))			PS(P-18:0/15:1(9Z))
PG(22:1(11Z)/0:0)		Pipecuronium			PS(P-18:0/17:2(9Z,12Z))
PG(22:1(11Z)/12:0)		Pipercitine			PS(P-20:0/14:0)
PG(22:1(11Z)/14:0)		Pirenperone			PS(P-20:0/16:0)
PG(22:2(13Z,16Z)/15:1(9Z))		Pirimiphos-ethyl			PS(P-20:0/17:0)
PG(22:2(13Z,16Z)/16:0)		Piriprost			PS(P-20:0/20:5(5Z,8Z,11Z,14Z,17Z))
PG(22:4(7Z,10Z,13Z,16Z)/15:0)		piritramide			PS(P-20:0/22:4(7Z,10Z,13Z,16Z))
PG(22:4(7Z,10Z,13Z,16Z)/17:2(9Z,12Z))		Piscidic Acid			PS-5
PG(22:6(4Z,7Z,10Z,13Z,16Z,19Z)/14:0)		Pisumionoside			Pseudaminic acid
PG(22:6(4Z,7Z,10Z,13Z,16Z,19Z)/18:4(6Z,9Z,12Z,15Z))		Plantagonine			Pseudoargiopinin III
PG(22:6(4Z,7Z,10Z,13Z,16Z,19Z)/20:4(5Z,8Z,11Z,14Z))		Pollenitin 8-butyrate			Pseudoecgonine
PG(6:0/6:0)		Poly-g-D-glutamate			Pseudomonine
PG(8:0/8:0)[U]		Populin			PtdIns-(1,2-dioctanoyl)
PG(O-16:0/12:0)		Postin			Pulcherosine
PG(O-20:0/0:0)		Pradimicinone I			Pulverochromenol
PG(O-20:0/17:2(9Z,12Z))		Pramanicin			punaglandin 2
PG(O-20:0/21:0)		Pravadoline			Pymetrozine
PG(P-16:0/0:0)		Prazosin			Pyraclofos
PG(P-18:0/18:2(9Z,12Z))		Pregnanalone sulfate (Allopregnanolone sulfate)			Pyributicarb
PG(P-18:0/18:3(6Z,9Z,12Z))		Prieuranin Acetate			Pyridinoline
PG(P-18:0/22:6(4Z,7Z,10Z,13Z,16Z,19Z))		Pristinamycin IC			Pyridostigmine
PG(P-20:0/16:1(9Z))		Pro Ala			Pyridoxal Phosphate
PG(P-20:0/17:2(9Z,12Z))		Pro Ala Pro			Pyrimidodiazepine
PG(P-20:0/22:4(7Z,10Z,13Z,16Z))		Pro Arg Pro			Pyriminobac-methyl
Phaclofen		Pro Gln Ala			Pyrohyperforin
Phe Arg Gly		Pro His Phe			Pyrrhoxanthinol
Phe Arg His		Pro Lys Asp			Quadranguloside
Phe Asp Arg		Pro Lys Cys			Quercetin 3,7,3',4'-tetra-O-sulfate
Phe Cys Asp		Pro Lys Gly			Queuine
Phe Gln Phe		Pro Met Asp			Queuosine
Phe Glu Asn		Pro Phe Cys			Quinagolide glucuronide
Phe His Ala		Pro Pro Ser			Quinalphos
Phe Met Gln		Pro Trp Tyr			R-1-Propenyl 1-propanesulfinothioate
Phe Met Glu		Pro Tyr Ala			R207910
Phe Phe		Prodiamine			R-95913
Phe Phe Ala		Prolyl-Arginine			Raloxifene-4'-glucuronide
Phe Pro Tyr		Prolyl-Lysine			Ramiprilat glucuronide
Phe Trp Asp		Propafenone glucuronide			Ranitidine
Phe Trp Trp		Propagermanium			Ranitidine S-oxide
Phe4Cl-Asp-OH		Propane-1,2-diol 1-phosphate			Ranunculin
Phenazepam		Propetamphos			Renilla luciferin
Phenthoate		Propicillan			Renillafoulin A
Phenylamil		Propofol glucuronide			Resorufin
Phenylmethanesulfonyl fluoride		Prorepensin			Retapamulin
Phorbol 12-tiglate 13-decanoate		Protionamide sulfoxide			RG-108
Phosphoenol-4-deoxy-3-tetrulosonate		Protodegalactotigonin			Rhamnocitrin 3-glucoside-4'-(3''-dihydrophaseoylglucoside)
Phospho-L-serine		Protoporphyrin			Rhubafuran
Phosphoric acid		Protoveratrine A			Ribavirin 5'-phosphate
Phthalazinone pyrazole		PS(12:0/17:2(9Z,12Z))			Rigin
Phthalide		PS(12:0/20:4(5Z,8Z,11Z,14Z))			Rilmenidine
p-Hydroxyfosinopril		PS(12:0/20:5(5Z,8Z,11Z,14Z,17Z))			Risperidone
p-Hydroxygliquidone		PS(13:0/18:4(6Z,9Z,12Z,15Z))			Ro 19-4603
p-Hydroxytriamterene glucuronide		PS(14:1(9Z)/22:6(4Z,7Z,10Z,13Z,16Z,19Z))			Rofecoxib
Phygrine		PS(15:1(9Z)/12:0)			Rolitetracycline
Phyllalbine		PS(16:0/22:0)			Roxarsone
Physagulin A		PS(17:1(9Z)/12:0)			Rubraflavone B
Physagulin C		PS(18:4(6Z,9Z,12Z,15Z)/0:0)			Rubraflavone D
Physalin M		PS(19:1(9Z)/22:2(13Z,16Z))			S32826
Physalin O		PS(20:0/18:3(9Z,12Z,15Z))			Salinomycin
PI(10:0/16:1(9Z))		PS(20:0/18:4(6Z,9Z,12Z,15Z))			Sarothralin
PI(13:0/20:4(5Z,8Z,11Z,14Z))		PS(20:1(11Z)/0:0)			SB 228357
PI(13:0/20:5(5Z,8Z,11Z,14Z,17Z))		PS(20:4(5Z,8Z,11Z,14Z)/0:0)			SC-66
PI(14:0/14:0)		PS(20:4(5Z,8Z,11Z,14Z)/13:0)			Scarlet Red
PI(15:1(9Z)/22:6(4Z,7Z,10Z,13Z,16Z,19Z))		PS(21:0/18:3(6Z,9Z,12Z))			Sceptrin
PI(17:0/22:0)		PS(22:0/13:0)			Secobarbital
PI(17:1(9Z)/22:6(4Z,7Z,10Z,13Z,16Z,19Z))		PS(22:0/15:0)			Sedanonic acid
PI(18:0/16:2(9Z,12Z))		PS(22:0/18:3(9Z,12Z,15Z))			Selamectin
PI(18:3(9Z,12Z,15Z)/18:2(9Z,12Z))		PS(22:1(11Z)/17:1(9Z))			Selenohomocystine
PI(18:4(6Z,9Z,12Z,15Z)/13:0)		PS(22:2(13Z,16Z)/15:1(9Z))			Ser Ala Glu
PI(19:0/0:0)		PS(22:4(7Z,10Z,13Z,16Z)/22:6(4Z,7Z,10Z,13Z,16Z,19Z))			Ser Asn Asn
PI(19:1(9Z)/0:0)		PS(22:6(4Z,7Z,10Z,13Z,16Z,19Z)/19:0)			Ser His Pro
PI(20:0/18:1(9Z))		PS(22:6(4Z,7Z,10Z,13Z,16Z,19Z)/19:1(9Z))			Ser Met Ala
PI(20:1(11Z)/17:0)		PS(O-16:0/0:0)			Ser Ser Ser
PI(20:1(11Z)/18:3(6Z,9Z,12Z))		PS(O-16:0/14:0)			Ser Val Val
PI(20:2(11Z,14Z)/13:0)		PS(O-16:0/17:1(9Z))			Sericoside
PI(20:2(11Z,14Z)/15:1(9Z))		PS(O-16:0/18:0)			Serinyl-Lysine
PI(20:2(11Z,14Z)/22:6(4Z,7Z,10Z,13Z,16Z,19Z))		PS(O-16:0/19:1(9Z))			Sertindole
PI(20:5(5Z,8Z,11Z,14Z,17Z)/0:0)		PS(O-16:0/20:5(5Z,8Z,11Z,14Z,17Z))			Sevoflurane
PI(20:5(5Z,8Z,11Z,14Z,17Z)/18:3(6Z,9Z,12Z))		PS(O-16:0/22:4(7Z,10Z,13Z,16Z))			S-Glutaryldihydrolipoamide
PI(21:0/0:0)		PS(O-18:0/22:2(13Z,16Z))			Shanzhiside
PI(22:1(11Z)/19:0)		PS(O-18:0/22:4(7Z,10Z,13Z,16Z))			Simonin I
PI(22:2(13Z,16Z)/18:0)		PS(O-20:0/17:0)			Simulanoquinoline
PI(22:4(7Z,10Z,13Z,16Z)/21:0)		PS(P-18:0/14:1(9Z))			Simvastatin acid
PI(22:6(4Z,7Z,10Z,13Z,16Z,19Z)/14:1(9Z))		PS(P-18:0/17:2(9Z,12Z))			Sinapine
PI(22:6(4Z,7Z,10Z,13Z,16Z,19Z)/17:2(9Z,12Z))		PS(P-20:0/17:0)			SM(d16:1/23:0)
PI(22:6(4Z,7Z,10Z,13Z,16Z,19Z)/21:0)		PS(P-20:0/18:2(9Z,12Z))			SM(d18:1/12:0)
PI(O-16:0/0:0)		Psilocin			S-Methyl hexanethioate
PI(O-16:0/17:1(9Z))		psychosine sulfate			S-Methyl-3-phospho-1-thio-D-glycerate
PI(O-16:0/17:2(9Z,12Z))		PtdIns-(1,2-dioctanoyl)			Solacapine
PI(O-16:0/19:0)		PtdIns-(4)-P1 (1,2-dioctanoyl) biotin			Sophoracoumestan B
PI(O-18:0/0:0)		Puerarin 6''-acetate			Sophoraflavanone E
PI(O-18:0/12:0)		Puerarin xyloside			Sorbitan stearate
PI(O-18:0/22:1(11Z))		Purifolin			Spenolimycin
PI(O-20:0/0:0)		Purmorphamine			Spermine NONOate
PI(P-16:0/15:1(9Z))		Pyranocyanin A			s-phenylmercapturic acid
PI(P-16:0/16:1(9Z))		Pyridinoline			Sphingofungin E
PI(P-18:0/20:0)		Pyrilamine			Spinoflavanone A
PI(P-20:0/22:1(11Z))		Pyrrhoxanthin			Spirolide B
pibutidine		Quercetin 3,7,3',4'-tetra-O-sulfate			Spirolide E
PI-Cer(d20:0/26:0(2OH))		Queuosine			Spirostane-3,6-dione
PI-Cer(t20:0/16:0(2OH))		Quillaic acid			SQ 26180
PI-Cer(t20:0/20:0)		Quinagolide glucuronide			SQDG(22:5(5Z,8Z,11Z,14Z,17Z)/16:1(13Z))
PI-Cer(t20:0/26:0(2OH))		Quinalphos			SQMG(0:0/16:1(11Z))
Picrasin G		Quinapril			SR 12813
Pilocarpidine		Quinaprilat			Starch acetate
Pimozide		Quinquenoside F1			Steroid O-sulfate
PIP(18:2(9Z,12Z)/18:1(9Z))		Quintozene			Streptothricin F
Pipecuronium		R-138727			Strophanthidin Semicarbazide
Plantagonine		Raloxifene			SU 5416
PM-toxin B		Raloxifene-4'-glucuronide			Suberic acid
Pollenitin 8-butyrate		Ramiprilat glucuronide			Sulfaguanidine
Poloxalene		Ranitidine			Sulfasalazine
Polygonolide		Ranunculin			Sulfated Dihydromenaquinone-9
Populin		Raphanatin			Sulfoacetyl-CoA
Pradimicinone I		Raucaffricine			Sulindac sulfide glucuronide
Pramanicin		Renilla luciferin			Sulprofos
Pravadoline		Renillafoulin A			Sunitinib
Prazosin		Repaglinide			Symlandine
Prieuranin Acetate		Retapamulin			Tacrolimus
Prifinium		Retinylphosphate mannose			Taprostene
Pristinamycin IC		RG-108			Taraxacolide 1-O-b-D-glucopyranoside
Pro Glu Lys		Ribavirin 5'-phosphate			Taxa-4(20),11(12)-dien-5α-yl acetate
Pro His Arg		Ribosylimidazoleacetic acid			Taxol C
Pro His Phe		Ridogrel			Tazarotene
Pro Leu		Rilmenidine			TDE
Pro Leu Asp		Risedronic acid			Tegafur
Pro Leu His		Ritanserin			Teinemine
Pro Lys Arg		Rivastigmine			Terazosin glucuronide
Pro Lys Asn		R-L3			tetracosanal
Pro Lys Pro		Ro 19-4603			tetracosatetraenoic acid n-6
Pro Met Asp		Rofecoxib			Tetrahydrocurcumin
Pro Met Leu		Rolitetracycline			Tetrahydrofolyl-[Glu](n)
Pro Phe Cys		Ronidazole			tetrahydro-L-Biopterin
Pro Phe Glu		Rose bengal			Tetrahydroneopterin
Pro Pro Ser		Rosmic acid			Tetrahydrotrimethylhispidin
Propafenone		Rubusoside			Tetrahymanol
Propafenone glucuronide		Ruscopine			Tetramisole
Propantheline		S 26191			Tfa-VAL-TYR-VAL-OH
Propetamphos		S-(2-Methylpropionyl)-dihydrolipoamide-E			TG(12:0/12:0/18:4(6Z,9Z,12Z,15Z))[iso3]
Propicillan		S-(Allylthio)-L-cysteine			TG(12:0/12:0/20:5(5Z,8Z,11Z,14Z,17Z))[iso3]
Propofol glucuronide		S-(Indolylmethylthiohydroximoyl)-L-cysteine			TG(12:0/18:4(6Z,9Z,12Z,15Z)/22:6(4Z,7Z,10Z,13Z,16Z,19Z))[iso6]
Propylene glycol mono- and diesters of fats and fatty acids		S1P Lyase Fluorogenic Substrate			TG(14:1(9Z)/17:1(9Z)/20:5(5Z,8Z,11Z,14Z,17Z))[iso6]
Prosulfocarb		S32826			TG(16:1(9Z)/16:1(9Z)/17:2(9Z,12Z))[iso3]
Protodegalactotigonin		Safficinolide			TG(18:3(6Z,9Z,12Z)/20:4(5Z,8Z,11Z,14Z)/20:4(5Z,8Z,11Z,14Z))[iso3]
Protoveratrine A		Sagecoumarin			TG(22:6(4Z,7Z,10Z,13Z,16Z,19Z)/20:5(5Z,8Z,11Z,14Z,17Z)/22:6(4Z,7Z,10Z,13Z,16Z,19Z))[iso3]
PS(12:0/12:0)[U]		Sambacin			Thalicoside A
PS(12:0/20:5(5Z,8Z,11Z,14Z,17Z))		Samin			Thalicsessine
PS(15:1(9Z)/12:0)		Saphenamycin			Thaspine
PS(16:0/22:0)		Sativic acid			Thaumatin b, recombinant
PS(17:0/12:0)		SB 242084			Theonellasterol D
PS(17:1(9Z)/12:0)		SB 415286			Thicyofen
PS(17:1(9Z)/16:0)		SC-1			Thiocarbohydrazide
PS(17:2(9Z,12Z)/22:6(4Z,7Z,10Z,13Z,16Z,19Z))		Sceptrin			Thiolactomycin
PS(18:4(6Z,9Z,12Z,15Z)/0:0)		Sch 59884			Thio-THIP
PS(18:4(6Z,9Z,12Z,15Z)/22:6(4Z,7Z,10Z,13Z,16Z,19Z))		Scopolamine			Thiourocanic acid
PS(19:0/0:0)		Scyphostatin A			Thioxolone
PS(19:0/12:0)		Secoeremopetasitolide B			Thr Arg Cys
PS(19:0/22:0)		Selenocystine			Thr Cys Lys
PS(19:0/22:1(11Z))		Selenohomocystine			Thr Gln Ser
PS(19:1(9Z)/22:2(13Z,16Z))		Sequoyitol			Thr Glu Arg
PS(20:0/12:0)		Ser Ala Ala			Thr Glu Asp
PS(20:0/14:1(9Z))		Ser Arg Met			Thr His Ala
PS(20:1(11Z)/0:0)		Ser Ile Leu			Thr His Arg
PS(20:2(11Z,14Z)/18:3(6Z,9Z,12Z))		Ser Ser Ser			Thr His Lys
PS(20:3(8Z,11Z,14Z)/18:3(6Z,9Z,12Z))		Ser Thr Glu			Thr Met Lys
PS(20:5(5Z,8Z,11Z,14Z,17Z)/18:3(9Z,12Z,15Z))		Ser Val Trp			Thr Phe His
PS(22:0/13:0)		S-Glutaryldihydrolipoamide			Thr Ser His
PS(22:0/15:0)		Shanzhiside			Thr-Met-OH
PS(22:0/18:3(9Z,12Z,15Z))		Sildenafil			Thyrotropin releasing hormone
PS(22:1(11Z)/0:0)		Silica aerogel			Ticagrelor
PS(22:1(11Z)/13:0)		Simmondsin			Timosaponin A-III
PS(22:2(13Z,16Z)/0:0)		Simplexoside			tiracizine
PS(22:4(7Z,10Z,13Z,16Z)/0:0)		Simulanoquinoline			Tirofiban
PS(22:4(7Z,10Z,13Z,16Z)/17:0)		Simvastatin acid			Tocophersolan
PS(22:4(7Z,10Z,13Z,16Z)/22:6(4Z,7Z,10Z,13Z,16Z,19Z))		Sintaxanthin			Tolfenamic Acid
PS(22:6(4Z,7Z,10Z,13Z,16Z,19Z)/16:1(9Z))		SM(d18:1/12:0)			Tolperisone
PS(22:6(4Z,7Z,10Z,13Z,16Z,19Z)/18:0)		SM(d18:2/16:0)			Topaquinone
PS(22:6(4Z,7Z,10Z,13Z,16Z,19Z)/19:0)		S-Methyl-3-phospho-1-thio-D-glycerate			Torosaflavone B
PS(22:6(4Z,7Z,10Z,13Z,16Z,19Z)/19:1(9Z))		sn-2,3-di-O-phytanyl-1-phosphoglycerol-3-phospho-sn-2,3-di-O-phytanylglycerol			Toxoflavine
PS(22:6(4Z,7Z,10Z,13Z,16Z,19Z)/22:2(13Z,16Z))		SN-38			trans-1,4-bis(2-Chlorobenzaminomethyl)cyclohexane
PS(O-16:0/13:0)		Sodium stibogluconate			trans-2-[(Dimethylamino)methylimino]-5-[2-(5-nitro-2- furyl)-vinyl]-1,3,4-oxadiazole
PS(O-16:0/14:0)		Solanesol			Trans-4-Hydroxy-L-proline
PS(O-16:0/16:0)		Sophoracoumestan B			trans-Anhydrotephrostachin
PS(O-16:0/22:2(13Z,16Z))		s-phenylmercapturic acid			Triacetin
PS(O-18:0/22:2(13Z,16Z))		Spinoflavanone A			Triamcinolone hexacetonide
PS(O-20:0/0:0)		Spinoside A			Triazolidinonethione
PS(O-20:0/19:1(9Z))		Spiramycin			Tricetin 7,3'-diglucuronide
PS(P-16:0/18:2(9Z,12Z))		Spirapril			tridecyl decanoate
PS(P-16:0/18:3(9Z,12Z,15Z))		Spirilloxanthin			Triethylene glycol diglycidyl ether
PS(P-20:0/12:0)		Spirolide C			Trifluoromethylphenylpropanediol
PS(P-20:0/19:1(9Z))		Spirolide E			Trimethoprim 1-N-oxide
Psilocin		Spirolide F			Tri-N-acetylchitotriose
psychosine sulfate		Spongipregnoloside D			Trinexapac-ethyl
Ptaquiloside		SQDG(16:0/14:0)			Triparanol
PtdIns-(4)-P1 (1,2-dioctanoyl) biotin		SQMG(0:0/16:1(11Z))			Triptolide Analog
Pterine		SR 12813			Trisjuglone
Puerarin 6''-acetate		S-Ribosyl-L-homocysteine			Tromethamine
Puerarin xyloside		SRT 1720			Trp Arg Ile
punaglandin 3		Ssioriside			Trp Arg Met
Purifolin		S-Succinyldihydrolipoamide			Trp Asn Glu
Purmorphamine		Stanolone benzoate			Trp Gln Arg
Purothionin AII		Starch acetate			Trp His Gln
Pyranocyanin A		Staurosporine			Trp Ile Ser
Pyridoxamine		Steroid O-sulfate			Trp Leu Leu
Pyrilamine		Steryl sulfate			Trp Lys Thr
Pyrophaeophorbide a		Stovaine			Trp Pro Gly
Pyrrhoxanthin		Streptomycin			Trp Thr Pro
Quillaic acid		Streptothricin F			Trp Trp Tyr
Quinaprilat		Succinylcholine			Trp-Ile-OH
Quinoline yellow		Succinylproline			Tryptophyl-Phenylalanine
Quinoxaline-2-carboxylic acid		Sufentanil			Tsangane L 3-glucoside
QYNAD		Sulfinpyrazone			Tumonoic Acid I
R-138727		Sulprofos			Tylactone
Racephedrine		Syringin			Tyr Gln Glu
Raloxifene		Tacrolimus metabolite M-VII			Tyr Gln Leu
Raphanatin		Talampanel			Tyr His Cys
Raucaffricine		Tanakine			Tyr Ile Gly
Red chlorophyll catabolite		Tangeraxanthin			Tyr Met Trp
Retinyl beta-glucuronide		Taprostene			Tyr Pro His
Retinylphosphate mannose		Taraxacolide 1-O-b-D-glucopyranoside			Tyr Thr Lys
Retusoquinone		Taurallocholic acid			Tyr Trp Gly
Rhizonin A		TCA-ethadyl			Tyr Tyr Tyr
Ribosylimidazoleacetic acid		Tegafur			Tyrindoxyl sulfate
Ridogrel		Teleocidin B-1			TyrMe-Leu-OH
Rifabutin		Telithromycin			Tyrosyl-Leucine
Risedronic acid		Tenovin-1			Tyrosyl-Threonine
Ritanserin		Tephrodin			U-83836E
Rivastigmine		Terazosin glucuronide			UDP-3-ketoglucose
Rizatriptan		Tetrachloroisophthalonitrile			Umanopterin
R-L3		Tetrahydrofolyl-[Glu](n)			UR-12947
Ro 31-6045		Tetrahydrogeranylgeranyl diphosphate			Uracil
Robustadial A		tetrahydro-L-Biopterin			Ursonic acid
Robustocin		Tetrodotoxin			Val Asn
Ronidazole		TG(13:0/13:0/18:4(6Z,9Z,12Z,15Z))[iso3]			Val Asn Gln
Rose bengal		TG(14:0/14:1(9Z)/14:1(9Z))[iso3]			Val Asn Phe
Rosuvastatin		TG(14:0/16:1(9Z)/14:0) (d5)			Val Gln Pro
Rubusoside		TG(14:1(9Z)/15:0/15:1(9Z))[iso6]			Val Lys Asn
S 26191		TG(14:1(9Z)/18:3(6Z,9Z,12Z)/18:4(6Z,9Z,12Z,15Z))[iso6]			Val Pro His
S-(2-Methylpropionyl)-dihydrolipoamide-E		TG(15:1(9Z)/16:1(9Z)/18:3(9Z,12Z,15Z))[iso6]			Val Thr Val
S-(Allylthio)-L-cysteine		TG(17:2(9Z,12Z)/18:4(6Z,9Z,12Z,15Z)/18:4(6Z,9Z,12Z,15Z))[iso3]			Val Tyr Glu
S-(Indolylmethylthiohydroximoyl)-L-cysteine		Thalassemine			Val Tyr Gly
S-(N-Hydroxy-N-methylcarbamoyl)glutathione		Thalicsessine			Val Val
S1P Lyase Fluorogenic Substrate		Thapsigargin			Val Val Phe
Saccharopine		Thaspine			Valacyclovir
Safficinolide		Theonellasterol D			Val-Nap-OH
Sagecoumarin		Thermozeaxanthin-15/ Zeaxanthin glucoside ester			Valrubicin
Sambacin		Thiamine aldehyde			Valsartan
Samin		Thicyofen			Vanillactic acid
Sandoricin		Thio-THIP			Vanillic acid 4-sulfate
Saphenamycin		Thioxolone			Vanillin 4-sulfate
Sarmentosin		Thr Asn Lys			Variabiloside D
Sarracine		Thr Cys Lys			Velcorin
Sativic acid		Thr Cys Pro			Verimol G
SB 242084		Thr Glu Arg			vesnarinone
SB 415286		Thr Glu Asp			Vetiveryl acetate
SC-1		Thr His Arg			Vinaginsenoside R1
Sch 59884		Thr His Lys			Voglibose
Schleicherastatin 5		Thr Ile Leu			Withaphysacarpin
Sclerotiorin		Thr Met Lys			WWL70
Scopolamine		Thr Pro Met			WYE-354
Scorzoside		Thr Tyr Tyr			Xanomeline
Sebacic acid		threo-Syringoylglycerol			Xanthopterin
Secoeremopetasitolide B		Thr-Met-OH			Xerocomic acid
Selenocystine		Tifluadom			xi-3-Heptanol
Semustine		Tigecycline			xi-Anomuricine
Seneciphylline		Timosaponin A-III			Ximelagatran
Senkirkine		Tinyatoxin			Xylitol
Sequoyitol		Tirofiban			YM-201636
Ser Ala Ala		Tolfenamic Acid			Yucalexin P8
Ser Arg Met		Tolperisone			Yuccaol A
Ser His Arg		Torvonin A			Zafirlukast
Ser Ile His		Tracheloside			Zizyphine A
Ser Ile Leu		TRAM-3			Zolazepam
Ser Thr Glu		Trandolapril lactam (RU 46178)			Zolpidem Metabolite X-2
Ser Tyr His		Trans-2, 3, 4-Trimethoxycinnamate			Zuclopenthixol sulfoxide
Serratine		trans-2-[(Dimethylamino)methylimino]-5-[2-(5-nitro-2- furyl)-vinyl]-1,3,4-oxadiazole			Zymostenol-d7
Ser-Thr-OH		trans-3-Feruloylcorosolic acid			α-Hydroxyhippuric acid
Sertraline		trans-Resveratrol-d4			β-Hydroxypentanoate
Sildenafil		trans-trismethoxy Resveratrol-d4
Silica aerogel		trans-Zeatin riboside monophosphate
Simmondsin		Triacetin
Sintaxanthin		Triazolidinonethione
SM(d18:0/12:0)		Triazophos
SM(d18:0/13:0)		Trichomycin A
SM(d18:0/14:0)		Trihydroxycoprostanoic acid
SM(d18:0/17:0)		Tri-N-acetylchitotriose
SM(d18:2/14:0)		Triparanol
SM(d18:2/16:0)		Triprolidine
sn-2,3-di-O-phytanyl-1-phosphoglycerol-3-phospho-sn-2,3-di-O-phytanylglycerol		Trp Arg Met
SN-38		Trp Asn Glu
sn-3-O-(geranylgeranyl)glycerol 1-phosphate		Trp Glu Trp
Sodium stibogluconate		Trp His Gln
Solacauline		Trp Lys Ser
Solanesol		Trp Met Ser
Solanine		Trp Pro Leu
Sophoraisoflavanone D		Trp Trp
Sorbitan oleate		Trp Trp Lys
Sorbitan palmitate		Trp Trp Tyr
Spergualin		Trp Tyr Val
Spermidine		Trp-Ile-OH
Sphingofungin A		Trp-P-1
Sphingofungin F		Tsugarioside B
Spinetoram		Tumonoic Acid A
Spinoside A		Tussilagine
Spinosyn A		Tyr Arg Ala
Spiramycin		Tyr Arg Asp
Spiramycin 2		Tyr Gln Glu
Spirapril		Tyr Gln Met
Spirilloxanthin		Tyr Gly Gln
Spirolide C		Tyr His Gly
Spirolide F		Tyr Ile Thr
Spironolactone		Tyr Met Pro
Spongipregnoloside D		Tyr Phe Asn
SQDG(16:0/14:0)		Tyr Pro His
S-Ribosyl-L-homocysteine		Tyr Thr Arg
SRT 1720		Tyr Tyr Leu
S-Succinyldihydrolipoamide		Tyr Tyr Tyr
Stanolone benzoate		Tyr-OEt
Steryl sulfate		Tyrosyl-Hydroxyproline
Stovaine		Tyr-Ser-OH
Streptomycin		Tyr-Thr-OH
Strychnine		UCM707
Styrene oxide		Undecaprenyl phosphate mannose
Succinylcholine		UR-12947
Succinylproline		Ursiniolide A
Sulfachlorpyridazine		Ursonic acid
Sulfadiazine		Ustilagic acid
Sulfaquinoxaline		Uvaricin
Sulfinpyrazone		Val Asn Pro
Sulpiride		Val Asp His
Syringin		Val Cys Asn
Tacrolimus metabolite M-VII		Val His Val
Talampanel		Val Ile His
Tanabalin		Val Ser Glu
Tanakine		Val Thr Val
Tangeraxanthin		Val Trp Glu
Tasosartan		Val Tyr Asp
Taurallocholic acid		Val Val
TCA-ethadyl		Val Val Ala
Teleocidin B-1		Val-HoPhe-OH
Telithromycin		Val-Nap-OH
Tenofovir		Valsartan
Tenovin-1		Valyl-Histidine
Tephrodin		Vanillic acid 4-sulfate
Tepraloxydim		Vanillin 4-sulfate
Teprenone		Vanilpyruvic acid
Terbinafine metabolite		Vecuronium
Tetrachloroisophthalonitrile		Verruculogen
Tetracosahexaenoic acid		vesnarinone
tetradecanyl heptadecanoate		Vetiveryl acetate
Tetradifon		Vignatic acid A
Tetrahydrogambogic Acid		Vignatic acid B
Tetrahydrogeranylgeranyl diphosphate		Vilazodone
Tetrodotoxin		Vinaginsenoside R11
TG(13:0/13:0/18:4(6Z,9Z,12Z,15Z))[iso3]		Vinclozolin
TG(14:0/16:1(9Z)/14:0) (d5)		Voacamine
TG(14:1(9Z)/14:1(9Z)/18:3(9Z,12Z,15Z))[iso3]		Wistin
TG(14:1(9Z)/15:0/15:1(9Z))[iso6]		WWL70
TG(14:1(9Z)/18:3(6Z,9Z,12Z)/18:4(6Z,9Z,12Z,15Z))[iso6]		Xerocomic acid
TG(15:1(9Z)/16:1(9Z)/18:3(9Z,12Z,15Z))[iso6]		xi-1-Ethoxy-1-hexyloxyethane
TG(17:2(9Z,12Z)/17:2(9Z,12Z)/17:2(9Z,12Z))		xi-3-Heptanol
TG(17:2(9Z,12Z)/18:4(6Z,9Z,12Z,15Z)/18:4(6Z,9Z,12Z,15Z))[iso3]		Xylitol
Thalmidine		YC-1
Thapsigargin		YM-201636
Theasapogenol A		YS121
Thelepin		Yuccaol A
Thermozeaxanthin-15/ Zeaxanthin glucoside ester		Zaprinast
Thiamine aldehyde		zeta-Carotene epoxide
Thioproperazine		Ziziphin
Thr Ala Trp		Zolazepam
Thr Asn Asn		Zuclopenthixol glucuronide
Thr Asn Gln		Zuclopenthixol sulfoxide
Thr Asn Lys		Zygadenine
Thr Cys Pro		α-Hydroxyhippuric acid
Thr Glu Thr		α-Linolenoyl Ethanolamide
Thr Ile Leu		α-Thiophenecarboxylic acid
Thr Ile Lys		β-Hydroxypentanoate
Thr Phe Gln
Thr Pro Met
Thr Tyr Tyr
Threoninyl-Aspartate
Threoninyl-Serine
tianeptine
Tifluadom
Tilmicosin
Tinyatoxin
tipredane
Tocoretinate
Todralazine
Tolclofos-methyl
Tolrestat
Toremifene
Torvonin A
Tos-Arg-CH2Cl
Totarol
Toxaphene
Tracheloside
Tralomethrin
TRAM-3
Trandolaprilat glucuronide
trans-1-ethyl-4-methycyclohexane
Trans-2, 3, 4-Trimethoxycinnamate
trans-3-Feruloylcorosolic acid
trans-9,10-Epoxynonadecane
trans-Dehydroandrosterone
trans-Resveratrol 4'-sulfate
trans-Resveratrol-d4
trans-trismethoxy Resveratrol-d4
trans-Zeatin riboside monophosphate
Triamiphos
Triazophos
Trichomycin A
Triciribine
[truncated: 116 more rows]
